# Supplementary material for: A pan-cancer analysis of ring finger protein 135 and its relationship to triple-negative breast cancer proliferation and metastasis
Source: Aging (Albany NY). 2022 Dec 10;14(23):9758–72. doi: 10.18632/aging.204429 (PMC9792201; doi:10.18632/aging.204429)
Supplement: Supplementary Table 1 [file aging-14-204429-s002.xlsx]

## Sheet: Sheet1
Supplementary Table 1. Clinical information and RNF135 gene expression for each patient.
	T	Expression	SampleName
CESC(T1=140,T2=71,T3=20,T4=10)	T2	3.3148	TCGA-EK-A2RE-01
CESC(T1=140,T2=71,T3=20,T4=10)	T1	4.6866	TCGA-IR-A3L7-01
CESC(T1=140,T2=71,T3=20,T4=10)	T1	2.2299	TCGA-C5-A1MF-01
CESC(T1=140,T2=71,T3=20,T4=10)	T1	3.8239	TCGA-ZJ-A8QQ-01
CESC(T1=140,T2=71,T3=20,T4=10)	T2	3.7072	TCGA-EX-A3L1-01
CESC(T1=140,T2=71,T3=20,T4=10)	T2	3.2915	TCGA-JW-A5VI-01
CESC(T1=140,T2=71,T3=20,T4=10)	T1	4.839	TCGA-EA-A1QT-01
CESC(T1=140,T2=71,T3=20,T4=10)	T3	3.5035	TCGA-UC-A7PG-01
CESC(T1=140,T2=71,T3=20,T4=10)	T1	3.4398	TCGA-EA-A97N-01
CESC(T1=140,T2=71,T3=20,T4=10)	T1	4.0926	TCGA-EA-A3QD-01
CESC(T1=140,T2=71,T3=20,T4=10)	T1	3.0602	TCGA-C5-A1ME-01
CESC(T1=140,T2=71,T3=20,T4=10)	T1	3.8983	TCGA-C5-A8YR-01
CESC(T1=140,T2=71,T3=20,T4=10)	T2	3.8571	TCGA-FU-A40J-01
CESC(T1=140,T2=71,T3=20,T4=10)	T2	4.2404	TCGA-VS-A9V5-01
CESC(T1=140,T2=71,T3=20,T4=10)	T1	4.0858	TCGA-DS-A0VL-01
CESC(T1=140,T2=71,T3=20,T4=10)	T2	3.4739	TCGA-VS-A9UU-01
CESC(T1=140,T2=71,T3=20,T4=10)	T1	3.836	TCGA-ZJ-AAXN-01
CESC(T1=140,T2=71,T3=20,T4=10)	T4	3.7039	TCGA-VS-A9U6-01
CESC(T1=140,T2=71,T3=20,T4=10)	T2	3.2018	TCGA-C5-A2LX-01
CESC(T1=140,T2=71,T3=20,T4=10)	T1	4.382	TCGA-C5-A1M8-01
CESC(T1=140,T2=71,T3=20,T4=10)	T2	3.9792	TCGA-C5-A7CJ-01
CESC(T1=140,T2=71,T3=20,T4=10)	T1	3.2885	TCGA-GH-A9DA-01
CESC(T1=140,T2=71,T3=20,T4=10)	T1	3.7614	TCGA-EA-A5O9-01
CESC(T1=140,T2=71,T3=20,T4=10)	T1	4.0251	TCGA-Q1-A73P-01
CESC(T1=140,T2=71,T3=20,T4=10)	T3	4.5392	TCGA-VS-A9UD-01
CESC(T1=140,T2=71,T3=20,T4=10)	T1	4.4423	TCGA-VS-A9V2-01
CESC(T1=140,T2=71,T3=20,T4=10)	T2	3.6849	TCGA-VS-A94Y-01
CESC(T1=140,T2=71,T3=20,T4=10)	T2	4.0575	TCGA-VS-A9UJ-01
CESC(T1=140,T2=71,T3=20,T4=10)	T2	3.7443	TCGA-ZJ-AAXI-01
CESC(T1=140,T2=71,T3=20,T4=10)	T1	4.215	TCGA-VS-A9UQ-01
CESC(T1=140,T2=71,T3=20,T4=10)	T1	3.5035	TCGA-VS-A8EG-01
CESC(T1=140,T2=71,T3=20,T4=10)	T1	3.7688	TCGA-EX-A69L-01
CESC(T1=140,T2=71,T3=20,T4=10)	T1	4.248	TCGA-EA-A5ZE-01
CESC(T1=140,T2=71,T3=20,T4=10)	T1	4.2343	TCGA-JX-A5QV-01
CESC(T1=140,T2=71,T3=20,T4=10)	T1	3.5337	TCGA-EK-A2R9-01
CESC(T1=140,T2=71,T3=20,T4=10)	T1	4.2119	TCGA-IR-A3LL-01
CESC(T1=140,T2=71,T3=20,T4=10)	T1	4.0722	TCGA-C5-A1M5-01
CESC(T1=140,T2=71,T3=20,T4=10)	T2	3.0092	TCGA-C5-A7X8-01
CESC(T1=140,T2=71,T3=20,T4=10)	T1	4.0278	TCGA-EA-A3HS-01
CESC(T1=140,T2=71,T3=20,T4=10)	T2	3.4556	TCGA-IR-A3LH-01
CESC(T1=140,T2=71,T3=20,T4=10)	T3	3.865	TCGA-C5-A1M9-01
CESC(T1=140,T2=71,T3=20,T4=10)	T1	2.7679	TCGA-DG-A2KJ-01
CESC(T1=140,T2=71,T3=20,T4=10)	T1	3.9856	TCGA-HG-A2PA-01
CESC(T1=140,T2=71,T3=20,T4=10)	T4	3.9901	TCGA-EA-A50E-01
CESC(T1=140,T2=71,T3=20,T4=10)	T1	3.4034	TCGA-EA-A556-01
CESC(T1=140,T2=71,T3=20,T4=10)	T4	3.3264	TCGA-VS-A9V3-01
CESC(T1=140,T2=71,T3=20,T4=10)	T4	3.1162	TCGA-VS-A9UH-01
CESC(T1=140,T2=71,T3=20,T4=10)	T1	3.6463	TCGA-JX-A3PZ-01
CESC(T1=140,T2=71,T3=20,T4=10)	T1	3.8954	TCGA-C5-A1MP-01
CESC(T1=140,T2=71,T3=20,T4=10)	T1	4.2728	TCGA-MU-A5YI-01
CESC(T1=140,T2=71,T3=20,T4=10)	T1	4.1069	TCGA-VS-A8QA-01
CESC(T1=140,T2=71,T3=20,T4=10)	T1	4.0549	TCGA-FU-A5XV-01
CESC(T1=140,T2=71,T3=20,T4=10)	T2	3.5124	TCGA-EX-A8YF-01
CESC(T1=140,T2=71,T3=20,T4=10)	T1	2.8661	TCGA-IR-A3LB-01
CESC(T1=140,T2=71,T3=20,T4=10)	T2	3.1245	TCGA-HM-A6W2-01
CESC(T1=140,T2=71,T3=20,T4=10)	T1	3.5899	TCGA-EK-A2IR-01
CESC(T1=140,T2=71,T3=20,T4=10)	T1	4.3177	TCGA-IR-A3LF-01
CESC(T1=140,T2=71,T3=20,T4=10)	T1	4.1724	TCGA-HM-A4S6-01
CESC(T1=140,T2=71,T3=20,T4=10)	T2	3.6289	TCGA-VS-AA62-01
CESC(T1=140,T2=71,T3=20,T4=10)	T1	3.6184	TCGA-DS-A5RQ-01
CESC(T1=140,T2=71,T3=20,T4=10)	T1	4.4938	TCGA-BI-A20A-01
CESC(T1=140,T2=71,T3=20,T4=10)	T2	3.5779	TCGA-EA-A3HU-01
CESC(T1=140,T2=71,T3=20,T4=10)	T1	4.1891	TCGA-DG-A2KK-01
CESC(T1=140,T2=71,T3=20,T4=10)	T1	4.1228	TCGA-C5-A1MI-01
CESC(T1=140,T2=71,T3=20,T4=10)	T2	3.1829	TCGA-JW-A852-01
CESC(T1=140,T2=71,T3=20,T4=10)	T2	3.6939	TCGA-EK-A2RA-01
CESC(T1=140,T2=71,T3=20,T4=10)	T1	3.5362	TCGA-C5-A1MJ-01
CESC(T1=140,T2=71,T3=20,T4=10)	T1	3.6509	TCGA-MY-A5BE-01
CESC(T1=140,T2=71,T3=20,T4=10)	T1	4.222	TCGA-C5-A1BE-01
CESC(T1=140,T2=71,T3=20,T4=10)	T3	3.5009	TCGA-ZJ-AAXT-01
CESC(T1=140,T2=71,T3=20,T4=10)	T2	2.8858	TCGA-LP-A7HU-01
CESC(T1=140,T2=71,T3=20,T4=10)	T2	4.245	TCGA-2W-A8YY-01
CESC(T1=140,T2=71,T3=20,T4=10)	T1	4.2661	TCGA-EA-A411-01
CESC(T1=140,T2=71,T3=20,T4=10)	T2	1.8119	TCGA-EA-A410-01
CESC(T1=140,T2=71,T3=20,T4=10)	T1	4.1962	TCGA-VS-A952-01
CESC(T1=140,T2=71,T3=20,T4=10)	T1	3.6849	TCGA-EK-A2IP-01
CESC(T1=140,T2=71,T3=20,T4=10)	T1	3.7656	TCGA-FU-A3YQ-01
CESC(T1=140,T2=71,T3=20,T4=10)	T1	3.8886	TCGA-DS-A1OB-01
CESC(T1=140,T2=71,T3=20,T4=10)	T2	4.2258	TCGA-VS-A959-01
CESC(T1=140,T2=71,T3=20,T4=10)	T1	3.1797	TCGA-EK-A2R7-01
CESC(T1=140,T2=71,T3=20,T4=10)	T2	4.2142	TCGA-JW-A5VJ-01
CESC(T1=140,T2=71,T3=20,T4=10)	T1	4.0287	TCGA-MA-AA3Z-01
CESC(T1=140,T2=71,T3=20,T4=10)	T2	4.3855	TCGA-VS-A9UR-01
CESC(T1=140,T2=71,T3=20,T4=10)	T3	2.9413	TCGA-DS-A3LQ-01
CESC(T1=140,T2=71,T3=20,T4=10)	T2	2.5288	TCGA-ZJ-AAXU-01
CESC(T1=140,T2=71,T3=20,T4=10)	T1	4.248	TCGA-VS-A9UY-01
CESC(T1=140,T2=71,T3=20,T4=10)	T1	3.6172	TCGA-ZJ-AAXA-01
CESC(T1=140,T2=71,T3=20,T4=10)	T1	3.7741	TCGA-DS-A0VM-01
CESC(T1=140,T2=71,T3=20,T4=10)	T2	4.6955	TCGA-EX-A1H5-01
CESC(T1=140,T2=71,T3=20,T4=10)	T2	3.4868	TCGA-FU-A3EO-01
CESC(T1=140,T2=71,T3=20,T4=10)	T1	3.66	TCGA-EK-A2RK-01
CESC(T1=140,T2=71,T3=20,T4=10)	T1	4.2803	TCGA-Q1-A73S-01
CESC(T1=140,T2=71,T3=20,T4=10)	T2	2.3732	TCGA-PN-A8MA-01
CESC(T1=140,T2=71,T3=20,T4=10)	T1	4.1351	TCGA-DS-A7WF-01
CESC(T1=140,T2=71,T3=20,T4=10)	T2	3.9719	TCGA-HM-A3JK-01
CESC(T1=140,T2=71,T3=20,T4=10)	T2	2.578	TCGA-ZJ-AAXJ-01
CESC(T1=140,T2=71,T3=20,T4=10)	T3	3.3221	TCGA-VS-A9V1-01
CESC(T1=140,T2=71,T3=20,T4=10)	T2	1.6045	TCGA-FU-A3HZ-01
CESC(T1=140,T2=71,T3=20,T4=10)	T1	3.5349	TCGA-EA-A78R-01
CESC(T1=140,T2=71,T3=20,T4=10)	T2	4.2017	TCGA-JW-A5VG-01
CESC(T1=140,T2=71,T3=20,T4=10)	T4	3.3759	TCGA-VS-A9UV-01
CESC(T1=140,T2=71,T3=20,T4=10)	T2	3.992	TCGA-VS-A958-01
CESC(T1=140,T2=71,T3=20,T4=10)	T2	4.0816	TCGA-VS-A8EL-01
CESC(T1=140,T2=71,T3=20,T4=10)	T2	3.6254	TCGA-ZJ-AB0I-01
CESC(T1=140,T2=71,T3=20,T4=10)	T3	2.872	TCGA-VS-A950-01
CESC(T1=140,T2=71,T3=20,T4=10)	T1	3.5535	TCGA-IR-A3LK-01
CESC(T1=140,T2=71,T3=20,T4=10)	T1	4.4277	TCGA-DS-A1OC-01
CESC(T1=140,T2=71,T3=20,T4=10)	T1	3.1426	TCGA-C5-A3HE-01
CESC(T1=140,T2=71,T3=20,T4=10)	T1	3.5742	TCGA-MA-AA3W-01
CESC(T1=140,T2=71,T3=20,T4=10)	T3	4.1194	TCGA-VS-A9UL-01
CESC(T1=140,T2=71,T3=20,T4=10)	T2	3.3731	TCGA-VS-A9UO-01
CESC(T1=140,T2=71,T3=20,T4=10)	T1	4.2563	TCGA-FU-A3NI-01
CESC(T1=140,T2=71,T3=20,T4=10)	T2	3.0217	TCGA-EA-A439-01
CESC(T1=140,T2=71,T3=20,T4=10)	T1	2.7594	TCGA-VS-A9V0-01
CESC(T1=140,T2=71,T3=20,T4=10)	T1	3.5766	TCGA-EK-A3GK-01
CESC(T1=140,T2=71,T3=20,T4=10)	T1	4.2571	TCGA-C5-A7CG-01
CESC(T1=140,T2=71,T3=20,T4=10)	T1	3.4517	TCGA-HM-A3JJ-01
CESC(T1=140,T2=71,T3=20,T4=10)	T1	2.9929	TCGA-C5-A7UI-01
CESC(T1=140,T2=71,T3=20,T4=10)	T3	3.3435	TCGA-ZJ-AAXD-01
CESC(T1=140,T2=71,T3=20,T4=10)	T1	3.3993	TCGA-EK-A2R8-01
CESC(T1=140,T2=71,T3=20,T4=10)	T2	3.0995	TCGA-VS-A9UP-01
CESC(T1=140,T2=71,T3=20,T4=10)	T1	4.222	TCGA-EX-A69M-01
CESC(T1=140,T2=71,T3=20,T4=10)	T1	4.2396	TCGA-EA-A5ZD-01
CESC(T1=140,T2=71,T3=20,T4=10)	T3	3.5124	TCGA-JX-A3Q0-01
CESC(T1=140,T2=71,T3=20,T4=10)	T1	2.9765	TCGA-BI-A0VS-01
CESC(T1=140,T2=71,T3=20,T4=10)	T2	4.3972	TCGA-VS-A8EJ-01
CESC(T1=140,T2=71,T3=20,T4=10)	T1	3.8451	TCGA-DR-A0ZL-01
CESC(T1=140,T2=71,T3=20,T4=10)	T2	3.4291	TCGA-MA-AA41-01
CESC(T1=140,T2=71,T3=20,T4=10)	T2	3.695	TCGA-EA-A3HQ-01
CESC(T1=140,T2=71,T3=20,T4=10)	T2	2.9674	TCGA-LP-A5U2-01
CESC(T1=140,T2=71,T3=20,T4=10)	T1	3.1112	TCGA-EA-A43B-01
CESC(T1=140,T2=71,T3=20,T4=10)	T2	4.0445	TCGA-IR-A3LI-01
CESC(T1=140,T2=71,T3=20,T4=10)	T3	4.0688	TCGA-VS-A8EI-01
CESC(T1=140,T2=71,T3=20,T4=10)	T1	3.3549	TCGA-EA-A4BA-01
CESC(T1=140,T2=71,T3=20,T4=10)	T1	3.9719	TCGA-C5-A3HL-01
CESC(T1=140,T2=71,T3=20,T4=10)	T1	2.7444	TCGA-EA-A3Y4-01
CESC(T1=140,T2=71,T3=20,T4=10)	T1	3.6148	TCGA-UC-A7PF-01
CESC(T1=140,T2=71,T3=20,T4=10)	T2	3.5994	TCGA-VS-A9UB-01
CESC(T1=140,T2=71,T3=20,T4=10)	T1	4.5772	TCGA-UC-A7PI-01
CESC(T1=140,T2=71,T3=20,T4=10)	T2	3.6509	TCGA-DG-A2KL-01
CESC(T1=140,T2=71,T3=20,T4=10)	T1	4.3903	TCGA-JW-AAVH-01
CESC(T1=140,T2=71,T3=20,T4=10)	T2	3.3307	TCGA-MY-A5BF-01
CESC(T1=140,T2=71,T3=20,T4=10)	T1	4.222	TCGA-Q1-A5R1-01
CESC(T1=140,T2=71,T3=20,T4=10)	T1	4.1211	TCGA-FU-A57G-01
CESC(T1=140,T2=71,T3=20,T4=10)	T1	3.87	TCGA-C5-A2M1-01
CESC(T1=140,T2=71,T3=20,T4=10)	T1	3.8964	TCGA-R2-A69V-01
CESC(T1=140,T2=71,T3=20,T4=10)	T1	3.9185	TCGA-EA-A5ZF-01
CESC(T1=140,T2=71,T3=20,T4=10)	T2	3.7302	TCGA-FU-A23L-01
CESC(T1=140,T2=71,T3=20,T4=10)	T1	3.8954	TCGA-DS-A1OA-01
CESC(T1=140,T2=71,T3=20,T4=10)	T2	3.7149	TCGA-LP-A4AU-01
CESC(T1=140,T2=71,T3=20,T4=10)	T1	4.0515	TCGA-VS-A9U7-01
CESC(T1=140,T2=71,T3=20,T4=10)	T1	4.3965	TCGA-C5-A2LS-01
CESC(T1=140,T2=71,T3=20,T4=10)	T1	2.7029	TCGA-MA-AA3Y-01
CESC(T1=140,T2=71,T3=20,T4=10)	T1	3.7635	TCGA-DG-A2KM-01
CESC(T1=140,T2=71,T3=20,T4=10)	T1	3.1701	TCGA-C5-A2LT-01
CESC(T1=140,T2=71,T3=20,T4=10)	T1	3.7836	TCGA-C5-A1BK-01
CESC(T1=140,T2=71,T3=20,T4=10)	T1	4.018	TCGA-UC-A7PD-01
CESC(T1=140,T2=71,T3=20,T4=10)	T2	3.2313	TCGA-MY-A5BD-01
CESC(T1=140,T2=71,T3=20,T4=10)	T1	4.839	TCGA-VS-A9UZ-01
CESC(T1=140,T2=71,T3=20,T4=10)	T1	3.3549	TCGA-DS-A1OD-01
CESC(T1=140,T2=71,T3=20,T4=10)	T1	4.2833	TCGA-C5-A8XH-01
CESC(T1=140,T2=71,T3=20,T4=10)	T1	4.431	TCGA-JX-A3Q8-01
CESC(T1=140,T2=71,T3=20,T4=10)	T1	4.5711	TCGA-JW-A5VL-01
CESC(T1=140,T2=71,T3=20,T4=10)	T2	2.9469	TCGA-DS-A7WI-01
CESC(T1=140,T2=71,T3=20,T4=10)	T4	1.7273	TCGA-VS-A953-01
CESC(T1=140,T2=71,T3=20,T4=10)	T2	4.9246	TCGA-EA-A44S-01
CESC(T1=140,T2=71,T3=20,T4=10)	T1	4.1161	TCGA-VS-A957-01
CESC(T1=140,T2=71,T3=20,T4=10)	T4	1.8323	TCGA-JW-A5VH-01
CESC(T1=140,T2=71,T3=20,T4=10)	T2	4.2533	TCGA-EA-A3HR-01
CESC(T1=140,T2=71,T3=20,T4=10)	T1	4.1899	TCGA-EA-A3QE-01
CESC(T1=140,T2=71,T3=20,T4=10)	T1	3.2811	TCGA-WL-A834-01
CESC(T1=140,T2=71,T3=20,T4=10)	T1	4.4758	TCGA-JW-A69B-01
CESC(T1=140,T2=71,T3=20,T4=10)	T1	3.9992	TCGA-FU-A3HY-01
CESC(T1=140,T2=71,T3=20,T4=10)	T4	2.7615	TCGA-VS-A9V4-01
CESC(T1=140,T2=71,T3=20,T4=10)	T1	3.6042	TCGA-VS-A8Q8-01
CESC(T1=140,T2=71,T3=20,T4=10)	T1	2.9032	TCGA-DS-A0VN-01
CESC(T1=140,T2=71,T3=20,T4=10)	T1	3.1491	TCGA-MU-A8JM-01
CESC(T1=140,T2=71,T3=20,T4=10)	T1	4.5066	TCGA-C5-A2LY-01
CESC(T1=140,T2=71,T3=20,T4=10)	T1	2.4727	TCGA-FU-A23K-01
CESC(T1=140,T2=71,T3=20,T4=10)	T1	3.6277	TCGA-EA-A6QX-01
CESC(T1=140,T2=71,T3=20,T4=10)	T2	2.8779	TCGA-EK-A2RN-01
CESC(T1=140,T2=71,T3=20,T4=10)	T1	3.9515	TCGA-EK-A2RJ-01
CESC(T1=140,T2=71,T3=20,T4=10)	T2	3.449	TCGA-C5-A1BM-01
CESC(T1=140,T2=71,T3=20,T4=10)	T1	0.6517	TCGA-DS-A7WH-01
CESC(T1=140,T2=71,T3=20,T4=10)	T2	4.4654	TCGA-ZJ-AAX4-01
CESC(T1=140,T2=71,T3=20,T4=10)	T4	3.2297	TCGA-VS-A8EK-01
CESC(T1=140,T2=71,T3=20,T4=10)	T1	3.4868	TCGA-EA-A1QS-01
CESC(T1=140,T2=71,T3=20,T4=10)	T2	4.0918	TCGA-FU-A3WB-01
CESC(T1=140,T2=71,T3=20,T4=10)	T2	3.9992	TCGA-FU-A3TQ-01
CESC(T1=140,T2=71,T3=20,T4=10)	T1	4.0136	TCGA-C5-A8XI-01
CESC(T1=140,T2=71,T3=20,T4=10)	T1	3.4881	TCGA-IR-A3LA-01
CESC(T1=140,T2=71,T3=20,T4=10)	T2	2.7805	TCGA-VS-A94X-01
CESC(T1=140,T2=71,T3=20,T4=10)	T2	4.0765	TCGA-MA-AA42-01
CESC(T1=140,T2=71,T3=20,T4=10)	T3	3.4765	TCGA-ZJ-AB0H-01
CESC(T1=140,T2=71,T3=20,T4=10)	T2	3.9487	TCGA-VS-A9U5-01
CESC(T1=140,T2=71,T3=20,T4=10)	T1	3.6497	TCGA-C5-A1M7-01
CESC(T1=140,T2=71,T3=20,T4=10)	T1	3.9543	TCGA-C5-A905-01
CESC(T1=140,T2=71,T3=20,T4=10)	T1	3.9166	TCGA-EK-A3GJ-01
CESC(T1=140,T2=71,T3=20,T4=10)	T2	4.245	TCGA-MU-A51Y-01
CESC(T1=140,T2=71,T3=20,T4=10)	T1	3.154	TCGA-DG-A2KH-01
CESC(T1=140,T2=71,T3=20,T4=10)	T3	3.7028	TCGA-VS-A8EB-01
CESC(T1=140,T2=71,T3=20,T4=10)	T1	4.8345	TCGA-LP-A4AX-01
CESC(T1=140,T2=71,T3=20,T4=10)	T2	4.2304	TCGA-VS-A94Z-01
CESC(T1=140,T2=71,T3=20,T4=10)	T1	1.766	TCGA-ZJ-AAXB-01
CESC(T1=140,T2=71,T3=20,T4=10)	T2	2.8422	TCGA-C5-A1MQ-01
CESC(T1=140,T2=71,T3=20,T4=10)	T1	4.0807	TCGA-EX-A1H6-01
CESC(T1=140,T2=71,T3=20,T4=10)	T2	3.9002	TCGA-ZJ-AAXF-01
CESC(T1=140,T2=71,T3=20,T4=10)	T3	4.404	TCGA-VS-A9UM-01
CESC(T1=140,T2=71,T3=20,T4=10)	T3	4.2335	TCGA-VS-A8EH-01
CESC(T1=140,T2=71,T3=20,T4=10)	T2	3.7083	TCGA-BI-A0VR-01
CESC(T1=140,T2=71,T3=20,T4=10)	T1	3.6148	TCGA-EA-A5FO-01
CESC(T1=140,T2=71,T3=20,T4=10)	T2	3.3148	TCGA-DR-A0ZM-01
CESC(T1=140,T2=71,T3=20,T4=10)	T3	3.772	TCGA-MA-AA43-01
CESC(T1=140,T2=71,T3=20,T4=10)	T1	2.6715	TCGA-C5-A7UC-01
CESC(T1=140,T2=71,T3=20,T4=10)	T1	4.2541	TCGA-C5-A7XC-01
CESC(T1=140,T2=71,T3=20,T4=10)	T1	4.4516	TCGA-LP-A5U3-01
CESC(T1=140,T2=71,T3=20,T4=10)	T4	3.9691	TCGA-DS-A1O9-01
CESC(T1=140,T2=71,T3=20,T4=10)	T1	3.2988	TCGA-EA-A3HT-01
CESC(T1=140,T2=71,T3=20,T4=10)	T1	4.1804	TCGA-IR-A3LC-01
CESC(T1=140,T2=71,T3=20,T4=10)	T2	3.3675	TCGA-FU-A770-01
CESC(T1=140,T2=71,T3=20,T4=10)	T3	4.5886	TCGA-VS-A8EC-01
CESC(T1=140,T2=71,T3=20,T4=10)	T1	2.828	TCGA-4J-AA1J-01
CESC(T1=140,T2=71,T3=20,T4=10)	T1	2.8422	TCGA-LP-A4AV-01
CESC(T1=140,T2=71,T3=20,T4=10)	T1	3.7678	TCGA-EK-A2RL-01
CESC(T1=140,T2=71,T3=20,T4=10)	T2	3.8249	TCGA-VS-A9UC-01
CESC(T1=140,T2=71,T3=20,T4=10)	T1	3.7269	TCGA-FU-A2QG-01
CESC(T1=140,T2=71,T3=20,T4=10)	T1	4.327	TCGA-DS-A0VK-01
CESC(T1=140,T2=71,T3=20,T4=10)	T2	3.7028	TCGA-VS-A94W-01
CESC(T1=140,T2=71,T3=20,T4=10)	T1	3.2359	TCGA-C5-A0TN-01
CESC(T1=140,T2=71,T3=20,T4=10)	T2	3.2752	TCGA-VS-A9UI-01
CESC(T1=140,T2=71,T3=20,T4=10)	T1	3.4648	TCGA-FU-A3TX-01
CESC(T1=140,T2=71,T3=20,T4=10)	T1	4.479	TCGA-Q1-A6DV-01
CESC(T1=140,T2=71,T3=20,T4=10)	T3	2.4492	TCGA-VS-A954-01
CESC(T1=140,T2=71,T3=20,T4=10)	T1	4.2366	TCGA-XS-A8TJ-01
CESC(T1=140,T2=71,T3=20,T4=10)	T1	4.1053	TCGA-LP-A4AW-01
CESC(T1=140,T2=71,T3=20,T4=10)	T1	3.0978	TCGA-JW-A5VK-01
CESC(T1=140,T2=71,T3=20,T4=10)	T1	4.6206	TCGA-EX-A449-01
CESC(T1=140,T2=71,T3=20,T4=10)	T3	3.0411	TCGA-MA-AA3X-01
CESC(T1=140,T2=71,T3=20,T4=10)	T1	2.0111	TCGA-C5-A2LV-01
CESC(T1=140,T2=71,T3=20,T4=10)	T1	3.4517	TCGA-VS-A9UT-01
CESC(T1=140,T2=71,T3=20,T4=10)	T3	3.6793	TCGA-ZJ-AAX8-01
LUAD(T1=169,T2=276,T3=47,T4=18)	T1	3.6703	TCGA-44-6778-01
LUAD(T1=169,T2=276,T3=47,T4=18)	T2	2.9655	TCGA-05-4420-01
LUAD(T1=169,T2=276,T3=47,T4=18)	T1	4.6041	TCGA-64-1679-01
LUAD(T1=169,T2=276,T3=47,T4=18)	T2	4.4283	TCGA-49-6744-01
LUAD(T1=169,T2=276,T3=47,T4=18)	T2	3.6335	TCGA-55-6982-01
LUAD(T1=169,T2=276,T3=47,T4=18)	T2	4.4337	TCGA-NJ-A4YI-01
LUAD(T1=169,T2=276,T3=47,T4=18)	T1	4.3807	TCGA-73-4666-01
LUAD(T1=169,T2=276,T3=47,T4=18)	T2	4.4516	TCGA-MN-A4N1-01
LUAD(T1=169,T2=276,T3=47,T4=18)	T1	3.794	TCGA-55-7911-01
LUAD(T1=169,T2=276,T3=47,T4=18)	T1	4.7187	TCGA-55-A4DG-01
LUAD(T1=169,T2=276,T3=47,T4=18)	T3	3.832	TCGA-L9-A5IP-01
LUAD(T1=169,T2=276,T3=47,T4=18)	T1	4.3548	TCGA-73-4662-01
LUAD(T1=169,T2=276,T3=47,T4=18)	T2	3.907	TCGA-55-6712-01
LUAD(T1=169,T2=276,T3=47,T4=18)	T1	4.1547	TCGA-97-7553-01
LUAD(T1=169,T2=276,T3=47,T4=18)	T1	3.6916	TCGA-49-AARE-01
LUAD(T1=169,T2=276,T3=47,T4=18)	T1	4.2072	TCGA-50-8460-01
LUAD(T1=169,T2=276,T3=47,T4=18)	T4	4.6101	TCGA-50-5933-01
LUAD(T1=169,T2=276,T3=47,T4=18)	T1	3.5839	TCGA-44-6774-01
LUAD(T1=169,T2=276,T3=47,T4=18)	T2	3.838	TCGA-73-4670-01
LUAD(T1=169,T2=276,T3=47,T4=18)	T1	4.6634	TCGA-55-A48Z-01
LUAD(T1=169,T2=276,T3=47,T4=18)	T2	3.928	TCGA-75-7031-01
LUAD(T1=169,T2=276,T3=47,T4=18)	T2	4.664	TCGA-44-A47A-01
LUAD(T1=169,T2=276,T3=47,T4=18)	T4	4.863	TCGA-05-4398-01
LUAD(T1=169,T2=276,T3=47,T4=18)	T2	3.1765	TCGA-67-3773-01
LUAD(T1=169,T2=276,T3=47,T4=18)	T2	3.927	TCGA-64-5781-01
LUAD(T1=169,T2=276,T3=47,T4=18)	T2	3.9506	TCGA-97-7552-01
LUAD(T1=169,T2=276,T3=47,T4=18)	T1	4.306	TCGA-49-AARN-01
LUAD(T1=169,T2=276,T3=47,T4=18)	T1	4.6445	TCGA-44-3919-01
LUAD(T1=169,T2=276,T3=47,T4=18)	T1	2.685	TCGA-99-8032-01
LUAD(T1=169,T2=276,T3=47,T4=18)	T1	4.3321	TCGA-55-8299-01
LUAD(T1=169,T2=276,T3=47,T4=18)	T1	3.8013	TCGA-55-A491-01
LUAD(T1=169,T2=276,T3=47,T4=18)	T2	4.2235	TCGA-50-6595-01
LUAD(T1=169,T2=276,T3=47,T4=18)	T2	3.1987	TCGA-95-A4VP-01
LUAD(T1=169,T2=276,T3=47,T4=18)	T2	4.7698	TCGA-55-8302-01
LUAD(T1=169,T2=276,T3=47,T4=18)	T2	2.71391	TCGA-44-4112-01
LUAD(T1=169,T2=276,T3=47,T4=18)	T2	4.0943	TCGA-05-4430-01
LUAD(T1=169,T2=276,T3=47,T4=18)	T2	3.5608	TCGA-75-7027-01
LUAD(T1=169,T2=276,T3=47,T4=18)	T2	2.64332	TCGA-44-2668-01
LUAD(T1=169,T2=276,T3=47,T4=18)	T1	4.2699	TCGA-55-8507-01
LUAD(T1=169,T2=276,T3=47,T4=18)	T2	3.5324	TCGA-69-8254-01
LUAD(T1=169,T2=276,T3=47,T4=18)	T1	3.2557	TCGA-78-8640-01
LUAD(T1=169,T2=276,T3=47,T4=18)	T2	4.0943	TCGA-69-7979-01
LUAD(T1=169,T2=276,T3=47,T4=18)	T1	4.073	TCGA-55-7573-01
LUAD(T1=169,T2=276,T3=47,T4=18)	T2	3.6497	TCGA-49-4506-01
LUAD(T1=169,T2=276,T3=47,T4=18)	T2	4.6358	TCGA-05-4402-01
LUAD(T1=169,T2=276,T3=47,T4=18)	T3	2.791	TCGA-44-8119-01
LUAD(T1=169,T2=276,T3=47,T4=18)	T2	4.2404	TCGA-55-7724-01
LUAD(T1=169,T2=276,T3=47,T4=18)	T1	4.5192	TCGA-44-6776-01
LUAD(T1=169,T2=276,T3=47,T4=18)	T1	3.3061	TCGA-49-4514-01
LUAD(T1=169,T2=276,T3=47,T4=18)	T4	3.6669	TCGA-05-4396-01
LUAD(T1=169,T2=276,T3=47,T4=18)	T2	3.8729	TCGA-55-8204-01
LUAD(T1=169,T2=276,T3=47,T4=18)	T1	5.0926	TCGA-L4-A4E6-01
LUAD(T1=169,T2=276,T3=47,T4=18)	T2	4.9026	TCGA-75-6205-01
LUAD(T1=169,T2=276,T3=47,T4=18)	T2	4.1563	TCGA-62-A46O-01
LUAD(T1=169,T2=276,T3=47,T4=18)	T2	4.891	TCGA-78-7155-01
LUAD(T1=169,T2=276,T3=47,T4=18)	T3	4.7666	TCGA-62-A472-01
LUAD(T1=169,T2=276,T3=47,T4=18)	T1	3.1278	TCGA-NJ-A55R-01
LUAD(T1=169,T2=276,T3=47,T4=18)	T3	4.5299	TCGA-62-8395-01
LUAD(T1=169,T2=276,T3=47,T4=18)	T2	4.1676	TCGA-95-7567-01
LUAD(T1=169,T2=276,T3=47,T4=18)	T2	2.5213	TCGA-50-5051-01
LUAD(T1=169,T2=276,T3=47,T4=18)	T2	3.9204	TCGA-55-A48Y-01
LUAD(T1=169,T2=276,T3=47,T4=18)	T1	4.7528	TCGA-86-A456-01
LUAD(T1=169,T2=276,T3=47,T4=18)	T2	2.6805	TCGA-50-5068-01
LUAD(T1=169,T2=276,T3=47,T4=18)	T2	4.511	TCGA-NJ-A55A-01
LUAD(T1=169,T2=276,T3=47,T4=18)	T1	5.2388	TCGA-J2-A4AG-01
LUAD(T1=169,T2=276,T3=47,T4=18)	T2	4.717	TCGA-05-4405-01
LUAD(T1=169,T2=276,T3=47,T4=18)	T1	4.5632	TCGA-50-5944-01
LUAD(T1=169,T2=276,T3=47,T4=18)	T2	4.0001	TCGA-86-7955-01
LUAD(T1=169,T2=276,T3=47,T4=18)	T1	4.585	TCGA-50-6673-01
LUAD(T1=169,T2=276,T3=47,T4=18)	T1	4.9584	TCGA-55-7727-01
LUAD(T1=169,T2=276,T3=47,T4=18)	T2	4.7704	TCGA-55-8510-01
LUAD(T1=169,T2=276,T3=47,T4=18)	T2	4.1732	TCGA-MP-A4T8-01
LUAD(T1=169,T2=276,T3=47,T4=18)	T2	4.248	TCGA-86-8279-01
LUAD(T1=169,T2=276,T3=47,T4=18)	T2	3.9645	TCGA-55-A494-01
LUAD(T1=169,T2=276,T3=47,T4=18)	T2	2.04649	TCGA-44-3917-01
LUAD(T1=169,T2=276,T3=47,T4=18)	T2	4.4887	TCGA-75-5125-01
LUAD(T1=169,T2=276,T3=47,T4=18)	T3	4.0153	TCGA-55-8615-01
LUAD(T1=169,T2=276,T3=47,T4=18)	T2	4.0287	TCGA-MP-A4TF-01
LUAD(T1=169,T2=276,T3=47,T4=18)	T2	4.2235	TCGA-55-6979-01
LUAD(T1=169,T2=276,T3=47,T4=18)	T3	4.4673	TCGA-86-A4JF-01
LUAD(T1=169,T2=276,T3=47,T4=18)	T2	2.6232	TCGA-86-7701-01
LUAD(T1=169,T2=276,T3=47,T4=18)	T2	4.0722	TCGA-62-8398-01
LUAD(T1=169,T2=276,T3=47,T4=18)	T1	5.5289	TCGA-L9-A443-01
LUAD(T1=169,T2=276,T3=47,T4=18)	T2	4.6259	TCGA-78-8660-01
LUAD(T1=169,T2=276,T3=47,T4=18)	T2	4.431	TCGA-78-7148-01
LUAD(T1=169,T2=276,T3=47,T4=18)	T2	4.0601	TCGA-67-6215-01
LUAD(T1=169,T2=276,T3=47,T4=18)	T2	4.1128	TCGA-55-A490-01
LUAD(T1=169,T2=276,T3=47,T4=18)	T2	5.1607	TCGA-69-7974-01
LUAD(T1=169,T2=276,T3=47,T4=18)	T2	4.5311	TCGA-49-AAR4-01
LUAD(T1=169,T2=276,T3=47,T4=18)	T3	4.1636	TCGA-05-4418-01
LUAD(T1=169,T2=276,T3=47,T4=18)	T1	4.1692	TCGA-35-4123-01
LUAD(T1=169,T2=276,T3=47,T4=18)	T2	2.8562	TCGA-55-6969-01
LUAD(T1=169,T2=276,T3=47,T4=18)	T1	3.9137	TCGA-91-8497-01
LUAD(T1=169,T2=276,T3=47,T4=18)	T2	4.232	TCGA-62-A470-01
LUAD(T1=169,T2=276,T3=47,T4=18)	T2	4.0028	TCGA-53-A4EZ-01
LUAD(T1=169,T2=276,T3=47,T4=18)	T1	4.235	TCGA-78-7162-01
LUAD(T1=169,T2=276,T3=47,T4=18)	T2	4.5491	TCGA-62-A46Y-01
LUAD(T1=169,T2=276,T3=47,T4=18)	T2	5.1827	TCGA-62-A46R-01
LUAD(T1=169,T2=276,T3=47,T4=18)	T2	4.6271	TCGA-05-4244-01
LUAD(T1=169,T2=276,T3=47,T4=18)	T2	3.4894	TCGA-L9-A8F4-01
LUAD(T1=169,T2=276,T3=47,T4=18)	T1	4.5072	TCGA-55-7726-01
LUAD(T1=169,T2=276,T3=47,T4=18)	T2	4.4713	TCGA-49-4512-01
LUAD(T1=169,T2=276,T3=47,T4=18)	T3	3.4543	TCGA-73-A9RS-01
LUAD(T1=169,T2=276,T3=47,T4=18)	T2	4.5934	TCGA-MP-A4TD-01
LUAD(T1=169,T2=276,T3=47,T4=18)	T2	3.836	TCGA-75-5147-01
LUAD(T1=169,T2=276,T3=47,T4=18)	T2	4.9769	TCGA-44-7671-01
LUAD(T1=169,T2=276,T3=47,T4=18)	T2	3.623	TCGA-38-4631-01
LUAD(T1=169,T2=276,T3=47,T4=18)	T1	3.6207	TCGA-NJ-A55O-01
LUAD(T1=169,T2=276,T3=47,T4=18)	T2	3.755	TCGA-75-6211-01
LUAD(T1=169,T2=276,T3=47,T4=18)	T2	2.6624	TCGA-05-5420-01
LUAD(T1=169,T2=276,T3=47,T4=18)	T2	3.0305	TCGA-55-1594-01
LUAD(T1=169,T2=276,T3=47,T4=18)	T2	3.9719	TCGA-64-5774-01
LUAD(T1=169,T2=276,T3=47,T4=18)	T2	4.7323	TCGA-50-5941-01
LUAD(T1=169,T2=276,T3=47,T4=18)	T2	3.53163	TCGA-44-2662-01
LUAD(T1=169,T2=276,T3=47,T4=18)	T1	4.3709	TCGA-97-A4M2-01
LUAD(T1=169,T2=276,T3=47,T4=18)	T1	4.4582	TCGA-55-7995-01
LUAD(T1=169,T2=276,T3=47,T4=18)	T1	3.9847	TCGA-95-7043-01
LUAD(T1=169,T2=276,T3=47,T4=18)	T2	4.2548	TCGA-NJ-A4YP-01
LUAD(T1=169,T2=276,T3=47,T4=18)	T1	4.1828	TCGA-97-A4M1-01
LUAD(T1=169,T2=276,T3=47,T4=18)	T4	4.2676	TCGA-78-7149-01
LUAD(T1=169,T2=276,T3=47,T4=18)	T1	4.1002	TCGA-MP-A4TC-01
LUAD(T1=169,T2=276,T3=47,T4=18)	T1	4.3786	TCGA-97-A4M5-01
LUAD(T1=169,T2=276,T3=47,T4=18)	T1	3.6961	TCGA-99-8028-01
LUAD(T1=169,T2=276,T3=47,T4=18)	T2	4.1899	TCGA-67-6217-01
LUAD(T1=169,T2=276,T3=47,T4=18)	T2	3.867	TCGA-44-A47B-01
LUAD(T1=169,T2=276,T3=47,T4=18)	T2	4.4088	TCGA-38-4628-01
LUAD(T1=169,T2=276,T3=47,T4=18)	T3	4.6994	TCGA-05-4250-01
LUAD(T1=169,T2=276,T3=47,T4=18)	T2	3.6849	TCGA-67-3774-01
LUAD(T1=169,T2=276,T3=47,T4=18)	T1	3.6748	TCGA-80-5608-01
LUAD(T1=169,T2=276,T3=47,T4=18)	T1	4.1474	TCGA-05-4389-01
LUAD(T1=169,T2=276,T3=47,T4=18)	T2	4.2631	TCGA-75-6203-01
LUAD(T1=169,T2=276,T3=47,T4=18)	T1	4.4751	TCGA-55-6981-01
LUAD(T1=169,T2=276,T3=47,T4=18)	T1	4.9996	TCGA-55-7903-01
LUAD(T1=169,T2=276,T3=47,T4=18)	T4	4.7104	TCGA-62-8394-01
LUAD(T1=169,T2=276,T3=47,T4=18)	T1	4.3126	TCGA-49-4488-01
LUAD(T1=169,T2=276,T3=47,T4=18)	T2	3.8177	TCGA-78-7537-01
LUAD(T1=169,T2=276,T3=47,T4=18)	T2	5.4296	TCGA-80-5611-01
LUAD(T1=169,T2=276,T3=47,T4=18)	T2	3.0163	TCGA-55-6972-01
LUAD(T1=169,T2=276,T3=47,T4=18)	T2	1.7786	TCGA-86-A4D0-01
LUAD(T1=169,T2=276,T3=47,T4=18)	T1	3.9608	TCGA-97-7941-01
LUAD(T1=169,T2=276,T3=47,T4=18)	T1	4.0497	TCGA-91-6840-01
LUAD(T1=169,T2=276,T3=47,T4=18)	T2	4.7214	TCGA-69-7978-01
LUAD(T1=169,T2=276,T3=47,T4=18)	T2	3.5911	TCGA-50-5930-01
LUAD(T1=169,T2=276,T3=47,T4=18)	T2	4.5123	TCGA-93-8067-01
LUAD(T1=169,T2=276,T3=47,T4=18)	T2	3.8239	TCGA-44-A479-01
LUAD(T1=169,T2=276,T3=47,T4=18)	T2	4.4364	TCGA-55-8087-01
LUAD(T1=169,T2=276,T3=47,T4=18)	T2	4.6815	TCGA-86-6562-01
LUAD(T1=169,T2=276,T3=47,T4=18)	T2	4.4556	TCGA-05-4425-01
LUAD(T1=169,T2=276,T3=47,T4=18)	T2	4.9416	TCGA-MP-A4SW-01
LUAD(T1=169,T2=276,T3=47,T4=18)	T1	3.8827	TCGA-55-8512-01
LUAD(T1=169,T2=276,T3=47,T4=18)	T1	4.5355	TCGA-67-3770-01
LUAD(T1=169,T2=276,T3=47,T4=18)	T2	4.5497	TCGA-50-6592-01
LUAD(T1=169,T2=276,T3=47,T4=18)	T2	3.9137	TCGA-55-6975-01
LUAD(T1=169,T2=276,T3=47,T4=18)	T1	2.5437	TCGA-S2-AA1A-01
LUAD(T1=169,T2=276,T3=47,T4=18)	T2	4.8115	TCGA-55-8511-01
LUAD(T1=169,T2=276,T3=47,T4=18)	T4	4.4667	TCGA-05-4434-01
LUAD(T1=169,T2=276,T3=47,T4=18)	T3	3.6266	TCGA-55-8092-01
LUAD(T1=169,T2=276,T3=47,T4=18)	T1	5.061	TCGA-L9-A50W-01
LUAD(T1=169,T2=276,T3=47,T4=18)	T2	4.3723	TCGA-44-7661-01
LUAD(T1=169,T2=276,T3=47,T4=18)	T2	4.3385	TCGA-05-4426-01
LUAD(T1=169,T2=276,T3=47,T4=18)	T2	3.6428	TCGA-05-4390-01
LUAD(T1=169,T2=276,T3=47,T4=18)	T2	4.3392	TCGA-64-5815-01
LUAD(T1=169,T2=276,T3=47,T4=18)	T2	3.8798	TCGA-69-7761-01
LUAD(T1=169,T2=276,T3=47,T4=18)	T2	3.6335	TCGA-55-8301-01
LUAD(T1=169,T2=276,T3=47,T4=18)	T1	4.3256	TCGA-44-A4SU-01
LUAD(T1=169,T2=276,T3=47,T4=18)	T4	3.6289	TCGA-69-7765-01
LUAD(T1=169,T2=276,T3=47,T4=18)	T2	4.2366	TCGA-05-4433-01
LUAD(T1=169,T2=276,T3=47,T4=18)	T2	2.9167	TCGA-55-8508-01
LUAD(T1=169,T2=276,T3=47,T4=18)	T4	3.2856	TCGA-50-5044-01
LUAD(T1=169,T2=276,T3=47,T4=18)	T2	4.3119	TCGA-05-4384-01
LUAD(T1=169,T2=276,T3=47,T4=18)	T1	4.856	TCGA-O1-A52J-01
LUAD(T1=169,T2=276,T3=47,T4=18)	T2	3.5791	TCGA-78-7220-01
LUAD(T1=169,T2=276,T3=47,T4=18)	T2	3.9251	TCGA-05-4422-01
LUAD(T1=169,T2=276,T3=47,T4=18)	T2	3.8136	TCGA-44-6779-01
LUAD(T1=169,T2=276,T3=47,T4=18)	T3	4.0532	TCGA-86-8672-01
LUAD(T1=169,T2=276,T3=47,T4=18)	T2	4.1277	TCGA-55-6983-01
LUAD(T1=169,T2=276,T3=47,T4=18)	T1	2.081	TCGA-91-8499-01
LUAD(T1=169,T2=276,T3=47,T4=18)	T2	3.8983	TCGA-91-6836-01
LUAD(T1=169,T2=276,T3=47,T4=18)	T1	3.6018	TCGA-38-7271-01
LUAD(T1=169,T2=276,T3=47,T4=18)	T2	4.4344	TCGA-NJ-A4YG-01
LUAD(T1=169,T2=276,T3=47,T4=18)	T2	4.6826	TCGA-73-4658-01
LUAD(T1=169,T2=276,T3=47,T4=18)	T1	3.5621	TCGA-86-8076-01
LUAD(T1=169,T2=276,T3=47,T4=18)	T1	3.6872	TCGA-55-6987-01
LUAD(T1=169,T2=276,T3=47,T4=18)	T2	3.3293	TCGA-78-7152-01
LUAD(T1=169,T2=276,T3=47,T4=18)	T2	3.7898	TCGA-55-8096-01
LUAD(T1=169,T2=276,T3=47,T4=18)	T2	4.3075	TCGA-75-5122-01
LUAD(T1=169,T2=276,T3=47,T4=18)	T2	4.2126	TCGA-50-5931-01
LUAD(T1=169,T2=276,T3=47,T4=18)	T1	4.423	TCGA-49-AARO-01
LUAD(T1=169,T2=276,T3=47,T4=18)	T1	4.1318	TCGA-44-2655-01
LUAD(T1=169,T2=276,T3=47,T4=18)	T2	3.9496	TCGA-73-4668-01
LUAD(T1=169,T2=276,T3=47,T4=18)	T2	3.3911	TCGA-91-6831-01
LUAD(T1=169,T2=276,T3=47,T4=18)	T1	4.3807	TCGA-L9-A444-01
LUAD(T1=169,T2=276,T3=47,T4=18)	T2	3.4945	TCGA-05-5425-01
LUAD(T1=169,T2=276,T3=47,T4=18)	T2	3.74248	TCGA-44-6775-01
LUAD(T1=169,T2=276,T3=47,T4=18)	T2	4.3421	TCGA-75-7025-01
LUAD(T1=169,T2=276,T3=47,T4=18)	T3	2.8096	TCGA-05-5429-01
LUAD(T1=169,T2=276,T3=47,T4=18)	T4	4.3625	TCGA-99-7458-01
LUAD(T1=169,T2=276,T3=47,T4=18)	T1	3.9626	TCGA-97-7546-01
LUAD(T1=169,T2=276,T3=47,T4=18)	T2	3.5911	TCGA-67-3772-01
LUAD(T1=169,T2=276,T3=47,T4=18)	T4	4.2056	TCGA-05-4395-01
LUAD(T1=169,T2=276,T3=47,T4=18)	T3	3.2988	TCGA-91-7771-01
LUAD(T1=169,T2=276,T3=47,T4=18)	T2	2.8562	TCGA-55-6984-01
LUAD(T1=169,T2=276,T3=47,T4=18)	T1	3.06885	TCGA-44-3918-01
LUAD(T1=169,T2=276,T3=47,T4=18)	T3	3.9012	TCGA-50-8459-01
LUAD(T1=169,T2=276,T3=47,T4=18)	T1	4.1939	TCGA-69-7980-01
LUAD(T1=169,T2=276,T3=47,T4=18)	T2	4.6306	TCGA-50-5939-01
LUAD(T1=169,T2=276,T3=47,T4=18)	T2	5.1069	TCGA-78-7143-01
LUAD(T1=169,T2=276,T3=47,T4=18)	T3	4.6376	TCGA-75-5126-01
LUAD(T1=169,T2=276,T3=47,T4=18)	T3	3.9089	TCGA-50-6594-01
LUAD(T1=169,T2=276,T3=47,T4=18)	T2	3.8441	TCGA-MP-A5C7-01
LUAD(T1=169,T2=276,T3=47,T4=18)	T1	3.04049	TCGA-44-5645-01
LUAD(T1=169,T2=276,T3=47,T4=18)	T1	4.6399	TCGA-50-5935-01
LUAD(T1=169,T2=276,T3=47,T4=18)	T1	3.8239	TCGA-55-7914-01
LUAD(T1=169,T2=276,T3=47,T4=18)	T2	4.6905	TCGA-55-7576-01
LUAD(T1=169,T2=276,T3=47,T4=18)	T2	2.91541	TCGA-44-2666-01
LUAD(T1=169,T2=276,T3=47,T4=18)	T3	4.402	TCGA-55-7284-01
LUAD(T1=169,T2=276,T3=47,T4=18)	T2	3.551	TCGA-73-4676-01
LUAD(T1=169,T2=276,T3=47,T4=18)	T2	3.3119	TCGA-78-7166-01
LUAD(T1=169,T2=276,T3=47,T4=18)	T1	4.079	TCGA-83-5908-01
LUAD(T1=169,T2=276,T3=47,T4=18)	T2	3.4945	TCGA-50-5049-01
LUAD(T1=169,T2=276,T3=47,T4=18)	T2	4.3213	TCGA-44-3396-01
LUAD(T1=169,T2=276,T3=47,T4=18)	T2	4.2578	TCGA-97-8172-01
LUAD(T1=169,T2=276,T3=47,T4=18)	T2	4.6053	TCGA-50-6597-01
LUAD(T1=169,T2=276,T3=47,T4=18)	T1	3.5621	TCGA-69-8255-01
LUAD(T1=169,T2=276,T3=47,T4=18)	T2	4.6	TCGA-62-A46U-01
LUAD(T1=169,T2=276,T3=47,T4=18)	T3	4.5085	TCGA-97-8176-01
LUAD(T1=169,T2=276,T3=47,T4=18)	T2	2.5087	TCGA-86-8358-01
LUAD(T1=169,T2=276,T3=47,T4=18)	T4	4.7442	TCGA-05-4415-01
LUAD(T1=169,T2=276,T3=47,T4=18)	T1	4.1587	TCGA-55-7281-01
LUAD(T1=169,T2=276,T3=47,T4=18)	T3	4.085	TCGA-78-7161-01
LUAD(T1=169,T2=276,T3=47,T4=18)	T3	3.7762	TCGA-49-4507-01
LUAD(T1=169,T2=276,T3=47,T4=18)	T1	4.2381	TCGA-55-8621-01
LUAD(T1=169,T2=276,T3=47,T4=18)	T2	3.8279	TCGA-55-6970-01
LUAD(T1=169,T2=276,T3=47,T4=18)	T2	5.7996	TCGA-75-6207-01
LUAD(T1=169,T2=276,T3=47,T4=18)	T2	4.5559	TCGA-55-8205-01
LUAD(T1=169,T2=276,T3=47,T4=18)	T1	3.8116	TCGA-69-7763-01
LUAD(T1=169,T2=276,T3=47,T4=18)	T1	4.2181	TCGA-55-7913-01
LUAD(T1=169,T2=276,T3=47,T4=18)	T3	2.9893	TCGA-62-8397-01
LUAD(T1=169,T2=276,T3=47,T4=18)	T2	3.3869	TCGA-73-4659-01
LUAD(T1=169,T2=276,T3=47,T4=18)	T2	3.3605	TCGA-91-A4BC-01
LUAD(T1=169,T2=276,T3=47,T4=18)	T2	5.0648	TCGA-97-8547-01
LUAD(T1=169,T2=276,T3=47,T4=18)	T2	3.9571	TCGA-97-8175-01
LUAD(T1=169,T2=276,T3=47,T4=18)	T2	4.7565	TCGA-86-8075-01
LUAD(T1=169,T2=276,T3=47,T4=18)	T2	4.3119	TCGA-55-6985-01
LUAD(T1=169,T2=276,T3=47,T4=18)	T1	4.3068	TCGA-55-A48X-01
LUAD(T1=169,T2=276,T3=47,T4=18)	T2	3.4411	TCGA-44-2657-01
LUAD(T1=169,T2=276,T3=47,T4=18)	T2	3.551	TCGA-95-7562-01
LUAD(T1=169,T2=276,T3=47,T4=18)	T1	4.0488	TCGA-55-7725-01
LUAD(T1=169,T2=276,T3=47,T4=18)	T3	3.9393	TCGA-69-A59K-01
LUAD(T1=169,T2=276,T3=47,T4=18)	T2	5	TCGA-05-5715-01
LUAD(T1=169,T2=276,T3=47,T4=18)	T1	4.3917	TCGA-55-A492-01
LUAD(T1=169,T2=276,T3=47,T4=18)	T4	5.3252	TCGA-78-7145-01
LUAD(T1=169,T2=276,T3=47,T4=18)	T2	4.3075	TCGA-86-8278-01
LUAD(T1=169,T2=276,T3=47,T4=18)	T3	4.0994	TCGA-69-8453-01
LUAD(T1=169,T2=276,T3=47,T4=18)	T1	4.425	TCGA-MN-A4N5-01
LUAD(T1=169,T2=276,T3=47,T4=18)	T2	3.7464	TCGA-64-5778-01
LUAD(T1=169,T2=276,T3=47,T4=18)	T3	4.5243	TCGA-J2-8194-01
LUAD(T1=169,T2=276,T3=47,T4=18)	T1	4.5814	TCGA-55-A57B-01
LUAD(T1=169,T2=276,T3=47,T4=18)	T1	4.2921	TCGA-38-4627-01
LUAD(T1=169,T2=276,T3=47,T4=18)	T2	3.5608	TCGA-86-7711-01
LUAD(T1=169,T2=276,T3=47,T4=18)	T2	3.4224	TCGA-05-5423-01
LUAD(T1=169,T2=276,T3=47,T4=18)	T2	3.0637	TCGA-91-8496-01
LUAD(T1=169,T2=276,T3=47,T4=18)	T2	4.0952	TCGA-86-8280-01
LUAD(T1=169,T2=276,T3=47,T4=18)	T3	2.34513	TCGA-44-6146-01
LUAD(T1=169,T2=276,T3=47,T4=18)	T2	3.6782	TCGA-78-7146-01
LUAD(T1=169,T2=276,T3=47,T4=18)	T1	3.1344	TCGA-35-4122-01
LUAD(T1=169,T2=276,T3=47,T4=18)	T3	3.6242	TCGA-78-8648-01
LUAD(T1=169,T2=276,T3=47,T4=18)	T1	4.5717	TCGA-86-7953-01
LUAD(T1=169,T2=276,T3=47,T4=18)	T2	4.1384	TCGA-44-5643-01
LUAD(T1=169,T2=276,T3=47,T4=18)	T1	4.2736	TCGA-73-7498-01
LUAD(T1=169,T2=276,T3=47,T4=18)	T2	4.5772	TCGA-75-6214-01
LUAD(T1=169,T2=276,T3=47,T4=18)	T1	4.2825	TCGA-93-7348-01
LUAD(T1=169,T2=276,T3=47,T4=18)	T2	4.2289	TCGA-97-8174-01
LUAD(T1=169,T2=276,T3=47,T4=18)	T1	1.674	TCGA-55-8620-01
LUAD(T1=169,T2=276,T3=47,T4=18)	T2	3.1491	TCGA-62-8399-01
LUAD(T1=169,T2=276,T3=47,T4=18)	T2	3.9534	TCGA-80-5607-01
LUAD(T1=169,T2=276,T3=47,T4=18)	T2	3.6691	TCGA-49-AAR2-01
LUAD(T1=169,T2=276,T3=47,T4=18)	T1	4.1907	TCGA-55-6543-01
LUAD(T1=169,T2=276,T3=47,T4=18)	T2	4.3126	TCGA-49-4501-01
LUAD(T1=169,T2=276,T3=47,T4=18)	T4	5.0211	TCGA-78-7156-01
LUAD(T1=169,T2=276,T3=47,T4=18)	T2	4.0636	TCGA-62-A46S-01
LUAD(T1=169,T2=276,T3=47,T4=18)	T2	3.3577	TCGA-49-AARQ-01
LUAD(T1=169,T2=276,T3=47,T4=18)	T2	3.9682	TCGA-93-A4JN-01
LUAD(T1=169,T2=276,T3=47,T4=18)	T2	3.5851	TCGA-91-6847-01
LUAD(T1=169,T2=276,T3=47,T4=18)	T2	3.2647	TCGA-55-6642-01
LUAD(T1=169,T2=276,T3=47,T4=18)	T1	3.5645	TCGA-55-8203-01
LUAD(T1=169,T2=276,T3=47,T4=18)	T1	3.9079	TCGA-44-7670-01
LUAD(T1=169,T2=276,T3=47,T4=18)	T1	3.6646	TCGA-MP-A4TJ-01
LUAD(T1=169,T2=276,T3=47,T4=18)	T2	4.4764	TCGA-38-6178-01
LUAD(T1=169,T2=276,T3=47,T4=18)	T1	4.4317	TCGA-86-8074-01
LUAD(T1=169,T2=276,T3=47,T4=18)	T2	3.9682	TCGA-55-8616-01
LUAD(T1=169,T2=276,T3=47,T4=18)	T2	4.5392	TCGA-97-A4M0-01
LUAD(T1=169,T2=276,T3=47,T4=18)	T3	4.597	TCGA-49-6767-01
LUAD(T1=169,T2=276,T3=47,T4=18)	T1	4.8455	TCGA-55-1595-01
LUAD(T1=169,T2=276,T3=47,T4=18)	T1	3.8249	TCGA-49-AARR-01
LUAD(T1=169,T2=276,T3=47,T4=18)	T2	5.1696	TCGA-MP-A4T9-01
LUAD(T1=169,T2=276,T3=47,T4=18)	T1	3.24451	TCGA-44-6147-01
LUAD(T1=169,T2=276,T3=47,T4=18)	T2	5.1579	TCGA-86-8073-01
LUAD(T1=169,T2=276,T3=47,T4=18)	T1	4.5274	TCGA-MN-A4N4-01
LUAD(T1=169,T2=276,T3=47,T4=18)	T1	4.0782	TCGA-97-A4M3-01
LUAD(T1=169,T2=276,T3=47,T4=18)	T1	4.3442	TCGA-86-7714-01
LUAD(T1=169,T2=276,T3=47,T4=18)	T1	3.637	TCGA-49-4487-01
LUAD(T1=169,T2=276,T3=47,T4=18)	T2	3.7061	TCGA-78-7542-01
LUAD(T1=169,T2=276,T3=47,T4=18)	T2	4.4196	TCGA-95-A4VK-01
LUAD(T1=169,T2=276,T3=47,T4=18)	T3	4.8856	TCGA-55-7994-01
LUAD(T1=169,T2=276,T3=47,T4=18)	T2	4.848	TCGA-49-6742-01
LUAD(T1=169,T2=276,T3=47,T4=18)	T1	5.2227	TCGA-MP-A4T6-01
LUAD(T1=169,T2=276,T3=47,T4=18)	T3	4.5687	TCGA-55-8506-01
LUAD(T1=169,T2=276,T3=47,T4=18)	T1	4.6428	TCGA-MP-A4TA-01
LUAD(T1=169,T2=276,T3=47,T4=18)	T2	3.7127	TCGA-55-8091-01
LUAD(T1=169,T2=276,T3=47,T4=18)	T1	4.0627	TCGA-91-6828-01
LUAD(T1=169,T2=276,T3=47,T4=18)	T2	2.5437	TCGA-35-5375-01
LUAD(T1=169,T2=276,T3=47,T4=18)	T1	4.6571	TCGA-97-A4M7-01
LUAD(T1=169,T2=276,T3=47,T4=18)	T2	4.5386	TCGA-78-7539-01
LUAD(T1=169,T2=276,T3=47,T4=18)	T2	4.5374	TCGA-J2-8192-01
LUAD(T1=169,T2=276,T3=47,T4=18)	T2	3.5779	TCGA-86-7713-01
LUAD(T1=169,T2=276,T3=47,T4=18)	T1	4.3737	TCGA-67-6216-01
LUAD(T1=169,T2=276,T3=47,T4=18)	T1	4.5583	TCGA-44-A47G-01
LUAD(T1=169,T2=276,T3=47,T4=18)	T2	4.7971	TCGA-78-7147-01
LUAD(T1=169,T2=276,T3=47,T4=18)	T1	3.3563	TCGA-44-3398-01
LUAD(T1=169,T2=276,T3=47,T4=18)	T2	4.001	TCGA-78-7633-01
LUAD(T1=169,T2=276,T3=47,T4=18)	T1	4.2751	TCGA-86-A4P8-01
LUAD(T1=169,T2=276,T3=47,T4=18)	T2	4.0366	TCGA-78-7535-01
LUAD(T1=169,T2=276,T3=47,T4=18)	T2	4.3017	TCGA-86-8671-01
LUAD(T1=169,T2=276,T3=47,T4=18)	T1	4.9284	TCGA-91-6835-01
LUAD(T1=169,T2=276,T3=47,T4=18)	T2	3.3364	TCGA-35-3615-01
LUAD(T1=169,T2=276,T3=47,T4=18)	T1	4.5589	TCGA-55-6980-01
LUAD(T1=169,T2=276,T3=47,T4=18)	T2	4.3392	TCGA-50-5936-01
LUAD(T1=169,T2=276,T3=47,T4=18)	T3	4.5398	TCGA-73-4675-01
LUAD(T1=169,T2=276,T3=47,T4=18)	T2	4.8475	TCGA-50-5932-01
LUAD(T1=169,T2=276,T3=47,T4=18)	T1	3.6207	TCGA-93-A4JO-01
LUAD(T1=169,T2=276,T3=47,T4=18)	T2	4.2158	TCGA-49-AAR3-01
LUAD(T1=169,T2=276,T3=47,T4=18)	T3	4.943	TCGA-78-7154-01
LUAD(T1=169,T2=276,T3=47,T4=18)	T2	2.3843	TCGA-55-7910-01
LUAD(T1=169,T2=276,T3=47,T4=18)	T1	2.8034	TCGA-4B-A93V-01
LUAD(T1=169,T2=276,T3=47,T4=18)	T2	3.6771	TCGA-91-6849-01
LUAD(T1=169,T2=276,T3=47,T4=18)	T2	4.0713	TCGA-MP-A4SY-01
LUAD(T1=169,T2=276,T3=47,T4=18)	T2	4.7049	TCGA-MP-A4SV-01
LUAD(T1=169,T2=276,T3=47,T4=18)	T3	4.1724	TCGA-55-8513-01
LUAD(T1=169,T2=276,T3=47,T4=18)	T2	4.551	TCGA-MP-A4T4-01
LUAD(T1=169,T2=276,T3=47,T4=18)	T2	5.1453	TCGA-71-8520-01
LUAD(T1=169,T2=276,T3=47,T4=18)	T1	3.8561	TCGA-44-7672-01
LUAD(T1=169,T2=276,T3=47,T4=18)	T1	5.1583	TCGA-50-6593-01
LUAD(T1=169,T2=276,T3=47,T4=18)	T2	3.8033	TCGA-69-7973-01
LUAD(T1=169,T2=276,T3=47,T4=18)	T1	4.2396	TCGA-67-3771-01
LUAD(T1=169,T2=276,T3=47,T4=18)	T2	4.429	TCGA-91-6848-01
LUAD(T1=169,T2=276,T3=47,T4=18)	T2	4.1724	TCGA-38-A44F-01
LUAD(T1=169,T2=276,T3=47,T4=18)	T2	3.29	TCGA-44-7660-01
LUAD(T1=169,T2=276,T3=47,T4=18)	T3	4.1891	TCGA-69-7760-01
LUAD(T1=169,T2=276,T3=47,T4=18)	T1	4.1318	TCGA-69-7764-01
LUAD(T1=169,T2=276,T3=47,T4=18)	T2	3.13381	TCGA-44-2665-01
LUAD(T1=169,T2=276,T3=47,T4=18)	T1	4.1547	TCGA-55-8505-01
LUAD(T1=169,T2=276,T3=47,T4=18)	T1	3.5608	TCGA-95-7944-01
LUAD(T1=169,T2=276,T3=47,T4=18)	T2	4.1169	TCGA-L9-A7SV-01
LUAD(T1=169,T2=276,T3=47,T4=18)	T1	3.8729	TCGA-55-8089-01
LUAD(T1=169,T2=276,T3=47,T4=18)	T3	4.8881	TCGA-55-7283-01
LUAD(T1=169,T2=276,T3=47,T4=18)	T2	3.5596	TCGA-44-8117-01
LUAD(T1=169,T2=276,T3=47,T4=18)	T1	4.2533	TCGA-53-7626-01
LUAD(T1=169,T2=276,T3=47,T4=18)	T2	4.4542	TCGA-86-8673-01
LUAD(T1=169,T2=276,T3=47,T4=18)	T2	5.054	TCGA-95-8494-01
LUAD(T1=169,T2=276,T3=47,T4=18)	T2	4.2381	TCGA-97-8171-01
LUAD(T1=169,T2=276,T3=47,T4=18)	T1	4.5405	TCGA-50-7109-01
LUAD(T1=169,T2=276,T3=47,T4=18)	T1	3.4726	TCGA-44-6145-01
LUAD(T1=169,T2=276,T3=47,T4=18)	T1	4.1836	TCGA-55-8085-01
LUAD(T1=169,T2=276,T3=47,T4=18)	T1	3.7992	TCGA-NJ-A4YF-01
LUAD(T1=169,T2=276,T3=47,T4=18)	T4	3.9118	TCGA-NJ-A7XG-01
LUAD(T1=169,T2=276,T3=47,T4=18)	T2	3.4237	TCGA-05-4403-01
LUAD(T1=169,T2=276,T3=47,T4=18)	T1	4.3723	TCGA-55-8097-01
LUAD(T1=169,T2=276,T3=47,T4=18)	T1	4.0357	TCGA-NJ-A4YQ-01
LUAD(T1=169,T2=276,T3=47,T4=18)	T2	3.9099	TCGA-97-7547-01
LUAD(T1=169,T2=276,T3=47,T4=18)	T1	2.3479	TCGA-55-5899-01
LUAD(T1=169,T2=276,T3=47,T4=18)	T2	4.7735	TCGA-05-4397-01
LUAD(T1=169,T2=276,T3=47,T4=18)	T2	4.4996	TCGA-44-6777-01
LUAD(T1=169,T2=276,T3=47,T4=18)	T2	4.63	TCGA-55-7815-01
LUAD(T1=169,T2=276,T3=47,T4=18)	T1	4.641	TCGA-91-6830-01
LUAD(T1=169,T2=276,T3=47,T4=18)	T1	4.5736	TCGA-44-A4SS-01
LUAD(T1=169,T2=276,T3=47,T4=18)	T1	4.2419	TCGA-44-7659-01
LUAD(T1=169,T2=276,T3=47,T4=18)	T4	3.8847	TCGA-53-7813-01
LUAD(T1=169,T2=276,T3=47,T4=18)	T2	4.1867	TCGA-05-4382-01
LUAD(T1=169,T2=276,T3=47,T4=18)	T1	4.3709	TCGA-93-A4JQ-01
LUAD(T1=169,T2=276,T3=47,T4=18)	T1	2.9413	TCGA-05-5428-01
LUAD(T1=169,T2=276,T3=47,T4=18)	T2	4.1277	TCGA-55-6986-01
LUAD(T1=169,T2=276,T3=47,T4=18)	T1	3.9506	TCGA-91-A4BD-01
LUAD(T1=169,T2=276,T3=47,T4=18)	T2	1.7744	TCGA-50-5066-01
LUAD(T1=169,T2=276,T3=47,T4=18)	T3	3.1669	TCGA-49-AAR9-01
LUAD(T1=169,T2=276,T3=47,T4=18)	T2	4.1859	TCGA-55-7907-01
LUAD(T1=169,T2=276,T3=47,T4=18)	T3	5.5943	TCGA-95-7039-01
LUAD(T1=169,T2=276,T3=47,T4=18)	T2	3.9543	TCGA-64-1680-01
LUAD(T1=169,T2=276,T3=47,T4=18)	T1	3.5851	TCGA-J2-A4AE-01
LUAD(T1=169,T2=276,T3=47,T4=18)	T3	4.2936	TCGA-86-8359-01
LUAD(T1=169,T2=276,T3=47,T4=18)	T2	3.644	TCGA-55-8614-01
LUAD(T1=169,T2=276,T3=47,T4=18)	T2	3.8621	TCGA-55-7574-01
LUAD(T1=169,T2=276,T3=47,T4=18)	T2	3.9883	TCGA-44-5644-01
LUAD(T1=169,T2=276,T3=47,T4=18)	T2	4.2899	TCGA-MP-A4TI-01
LUAD(T1=169,T2=276,T3=47,T4=18)	T2	4.6148	TCGA-95-7948-01
LUAD(T1=169,T2=276,T3=47,T4=18)	T2	4.1978	TCGA-73-4677-01
LUAD(T1=169,T2=276,T3=47,T4=18)	T1	3.6006	TCGA-50-5942-01
LUAD(T1=169,T2=276,T3=47,T4=18)	T2	4.4777	TCGA-78-7167-01
LUAD(T1=169,T2=276,T3=47,T4=18)	T2	5.1069	TCGA-78-8662-01
LUAD(T1=169,T2=276,T3=47,T4=18)	T2	4.1708	TCGA-86-8585-01
LUAD(T1=169,T2=276,T3=47,T4=18)	T2	4.3421	TCGA-50-6591-01
LUAD(T1=169,T2=276,T3=47,T4=18)	T2	4.2721	TCGA-MP-A4TK-01
LUAD(T1=169,T2=276,T3=47,T4=18)	T1	2.299	TCGA-55-7570-01
LUAD(T1=169,T2=276,T3=47,T4=18)	T2	4.2064	TCGA-78-7163-01
LUAD(T1=169,T2=276,T3=47,T4=18)	T2	3.9746	TCGA-05-4417-01
LUAD(T1=169,T2=276,T3=47,T4=18)	T1	4.6335	TCGA-78-8655-01
LUAD(T1=169,T2=276,T3=47,T4=18)	T2	4.3024	TCGA-97-7554-01
LUAD(T1=169,T2=276,T3=47,T4=18)	T2	3.944	TCGA-49-4505-01
LUAD(T1=169,T2=276,T3=47,T4=18)	T1	3.5337	TCGA-86-8669-01
LUAD(T1=169,T2=276,T3=47,T4=18)	T1	4.2899	TCGA-55-8208-01
LUAD(T1=169,T2=276,T3=47,T4=18)	T2	4.38	TCGA-75-6206-01
LUAD(T1=169,T2=276,T3=47,T4=18)	T2	3.2915	TCGA-55-6971-01
LUAD(T1=169,T2=276,T3=47,T4=18)	T2	5.2947	TCGA-05-4410-01
LUAD(T1=169,T2=276,T3=47,T4=18)	T2	4.1579	TCGA-55-8207-01
LUAD(T1=169,T2=276,T3=47,T4=18)	T2	3.06629	TCGA-38-4625-01
LUAD(T1=169,T2=276,T3=47,T4=18)	T1	3.2112	TCGA-55-6968-01
LUAD(T1=169,T2=276,T3=47,T4=18)	T1	4.7549	TCGA-L4-A4E5-01
LUAD(T1=169,T2=276,T3=47,T4=18)	T1	4.0705	TCGA-93-7347-01
LUAD(T1=169,T2=276,T3=47,T4=18)	T2	3.9755	TCGA-62-A471-01
LUAD(T1=169,T2=276,T3=47,T4=18)	T2	3.7507	TCGA-97-8177-01
LUAD(T1=169,T2=276,T3=47,T4=18)	T4	4.8635	TCGA-78-7160-01
LUAD(T1=169,T2=276,T3=47,T4=18)	T1	4.425	TCGA-97-7938-01
LUAD(T1=169,T2=276,T3=47,T4=18)	T2	2.1606	TCGA-64-1677-01
LUAD(T1=169,T2=276,T3=47,T4=18)	T1	4.0331	TCGA-69-8253-01
LUAD(T1=169,T2=276,T3=47,T4=18)	T1	3.6089	TCGA-78-7159-01
LUAD(T1=169,T2=276,T3=47,T4=18)	T2	4.4377	TCGA-97-7937-01
LUAD(T1=169,T2=276,T3=47,T4=18)	T2	2.75085	TCGA-44-2656-01
LUAD(T1=169,T2=276,T3=47,T4=18)	T1	4.9477	TCGA-J2-A4AD-01
LUAD(T1=169,T2=276,T3=47,T4=18)	T2	4.562	TCGA-97-A4LX-01
LUAD(T1=169,T2=276,T3=47,T4=18)	T2	4.0696	TCGA-62-A46P-01
LUAD(T1=169,T2=276,T3=47,T4=18)	T2	1.7097	TCGA-64-1678-01
LUAD(T1=169,T2=276,T3=47,T4=18)	T2	4.3484	TCGA-55-7728-01
LUAD(T1=169,T2=276,T3=47,T4=18)	T2	3.7248	TCGA-49-4510-01
LUAD(T1=169,T2=276,T3=47,T4=18)	T2	4.533	TCGA-55-A493-01
LUAD(T1=169,T2=276,T3=47,T4=18)	T2	3.3492	TCGA-MP-A4TE-01
LUAD(T1=169,T2=276,T3=47,T4=18)	T1	4.0593	TCGA-44-2659-01
LUAD(T1=169,T2=276,T3=47,T4=18)	T3	3.449	TCGA-75-7030-01
LUAD(T1=169,T2=276,T3=47,T4=18)	T3	4.0994	TCGA-55-7227-01
LUAD(T1=169,T2=276,T3=47,T4=18)	T2	3.449	TCGA-38-4630-01
LUAD(T1=169,T2=276,T3=47,T4=18)	T2	4.1899	TCGA-55-1592-01
LUAD(T1=169,T2=276,T3=47,T4=18)	T2	3.7561	TCGA-75-5146-01
LUAD(T1=169,T2=276,T3=47,T4=18)	T2	2.5163	TCGA-64-5779-01
LUAD(T1=169,T2=276,T3=47,T4=18)	T3	3.7783	TCGA-67-4679-01
LUAD(T1=169,T2=276,T3=47,T4=18)	T2	4.0019	TCGA-44-7662-01
LUAD(T1=169,T2=276,T3=47,T4=18)	T2	4.2001	TCGA-38-4626-01
LUAD(T1=169,T2=276,T3=47,T4=18)	T2	2.299	TCGA-86-8054-01
LUAD(T1=169,T2=276,T3=47,T4=18)	T2	3.9002	TCGA-55-1596-01
LUAD(T1=169,T2=276,T3=47,T4=18)	T1	3.9938	TCGA-86-6851-01
LUAD(T1=169,T2=276,T3=47,T4=18)	T4	2.9839	TCGA-64-5775-01
LUAD(T1=169,T2=276,T3=47,T4=18)	T1	3.6254	TCGA-64-1676-01
LUAD(T1=169,T2=276,T3=47,T4=18)	T3	3.6646	TCGA-44-7667-01
LUAD(T1=169,T2=276,T3=47,T4=18)	T3	4.309	TCGA-38-4629-01
LUAD(T1=169,T2=276,T3=47,T4=18)	T3	3.9393	TCGA-55-8619-01
LUAD(T1=169,T2=276,T3=47,T4=18)	T1	4.4745	TCGA-86-8281-01
LUAD(T1=169,T2=276,T3=47,T4=18)	T1	4.427	TCGA-44-6148-01
LUAD(T1=169,T2=276,T3=47,T4=18)	T1	4.8871	TCGA-97-8179-01
LUAD(T1=169,T2=276,T3=47,T4=18)	T2	3.4583	TCGA-78-7153-01
LUAD(T1=169,T2=276,T3=47,T4=18)	T1	2.3536	TCGA-44-7669-01
LUAD(T1=169,T2=276,T3=47,T4=18)	T2	4.711	TCGA-86-8055-01
LUAD(T1=169,T2=276,T3=47,T4=18)	T2	4.7523	TCGA-95-A4VN-01
LUAD(T1=169,T2=276,T3=47,T4=18)	T3	4.4913	TCGA-49-4494-01
LUAD(T1=169,T2=276,T3=47,T4=18)	T2	4.2892	TCGA-49-6745-01
LUAD(T1=169,T2=276,T3=47,T4=18)	T2	4.5784	TCGA-73-7499-01
LUAD(T1=169,T2=276,T3=47,T4=18)	T4	4.427	TCGA-78-7158-01
LUAD(T1=169,T2=276,T3=47,T4=18)	T2	5.2891	TCGA-71-6725-01
LUAD(T1=169,T2=276,T3=47,T4=18)	T2	4.3534	TCGA-50-6590-01
LUAD(T1=169,T2=276,T3=47,T4=18)	T1	3.8973	TCGA-55-A4DF-01
LUAD(T1=169,T2=276,T3=47,T4=18)	T2	4.4135	TCGA-86-7954-01
LUAD(T1=169,T2=276,T3=47,T4=18)	T2	3.9983	TCGA-L9-A743-01
LUAD(T1=169,T2=276,T3=47,T4=18)	T1	4.4588	TCGA-55-8206-01
LUAD(T1=169,T2=276,T3=47,T4=18)	T2	4.6236	TCGA-86-A4P7-01
LUAD(T1=169,T2=276,T3=47,T4=18)	T1	4.9496	TCGA-95-8039-01
LUAD(T1=169,T2=276,T3=47,T4=18)	T2	3.4843	TCGA-75-6212-01
LUAD(T1=169,T2=276,T3=47,T4=18)	T1	3.5349	TCGA-50-5055-01
LUAD(T1=169,T2=276,T3=47,T4=18)	T2	4.2773	TCGA-78-7150-01
LUAD(T1=169,T2=276,T3=47,T4=18)	T2	4.0523	TCGA-55-6978-01
LUAD(T1=169,T2=276,T3=47,T4=18)	T2	3.2313	TCGA-78-7536-01
LUAD(T1=169,T2=276,T3=47,T4=18)	T1	4.2048	TCGA-64-1681-01
LUAD(T1=169,T2=276,T3=47,T4=18)	T1	4.1186	TCGA-97-8552-01
LUAD(T1=169,T2=276,T3=47,T4=18)	T1	3.3979	TCGA-49-AAR0-01
LUAD(T1=169,T2=276,T3=47,T4=18)	T1	4.9194	TCGA-86-8668-01
LUAD(T1=169,T2=276,T3=47,T4=18)	T2	4.0748	TCGA-53-7624-01
LUAD(T1=169,T2=276,T3=47,T4=18)	T1	3.7464	TCGA-44-2661-01
LUAD(T1=169,T2=276,T3=47,T4=18)	T3	4.8535	TCGA-49-4490-01
LUAD(T1=169,T2=276,T3=47,T4=18)	T1	4.3009	TCGA-50-5946-01
LUAD(T1=169,T2=276,T3=47,T4=18)	T1	3.6184	TCGA-MP-A4TH-01
LUAD(T1=169,T2=276,T3=47,T4=18)	T2	4.0471	TCGA-91-6829-01
LUAD(T1=169,T2=276,T3=47,T4=18)	T2	3.9636	TCGA-78-7540-01
LUAD(T1=169,T2=276,T3=47,T4=18)	T3	4.3009	TCGA-99-8025-01
LUAD(T1=169,T2=276,T3=47,T4=18)	T2	4.1069	TCGA-44-8120-01
LUAD(T1=169,T2=276,T3=47,T4=18)	T1	3.2557	TCGA-49-4486-01
LUAD(T1=169,T2=276,T3=47,T4=18)	T2	3.9079	TCGA-55-8094-01
LUAD(T1=169,T2=276,T3=47,T4=18)	T1	5.3089	TCGA-49-6743-01
LUAD(T1=169,T2=276,T3=47,T4=18)	T1	3.9108	TCGA-99-AA5R-01
LUAD(T1=169,T2=276,T3=47,T4=18)	T2	3.6277	TCGA-MP-A4T7-01
LUAD(T1=169,T2=276,T3=47,T4=18)	T1	4.197	TCGA-55-8090-01
LUAD(T1=169,T2=276,T3=47,T4=18)	T1	4.9435	TCGA-97-A4M6-01
LUAD(T1=169,T2=276,T3=47,T4=18)	T2	4.5255	TCGA-05-4427-01
LUAD(T1=169,T2=276,T3=47,T4=18)	T2	4.7367	TCGA-55-8514-01
LUAD(T1=169,T2=276,T3=47,T4=18)	T2	3.4945	TCGA-62-8402-01
LUAD(T1=169,T2=276,T3=47,T4=18)	T3	3.9012	TCGA-05-4424-01
LUAD(T1=169,T2=276,T3=47,T4=18)	T2	3.5199	TCGA-38-4632-01
LUAD(T1=169,T2=276,T3=47,T4=18)	T1	4.4536	TCGA-49-6761-01
LUAD(T1=169,T2=276,T3=47,T4=18)	T2	3.3163	TCGA-05-4432-01
LUAD(T1=169,T2=276,T3=47,T4=18)	T1	4.3972	TCGA-49-AAQV-01
LUAD(T1=169,T2=276,T3=47,T4=18)	T2	5.0246	TCGA-50-5072-01
LUAD(T1=169,T2=276,T3=47,T4=18)	T2	3.4984	TCGA-50-5045-01
LUAD(T1=169,T2=276,T3=47,T4=18)	T2	4.0765	TCGA-86-8674-01
LUAD(T1=169,T2=276,T3=47,T4=18)	T1	4.2072	TCGA-50-8457-01
LUAD(T1=169,T2=276,T3=47,T4=18)	T1	4.5053	TCGA-95-7947-01
COAD(T1=6,T2=44,T3=196,T4=40)	T3	3.1604	TCGA-F4-6854-01
COAD(T1=6,T2=44,T3=196,T4=40)	T3	3.1278	TCGA-D5-5538-01
COAD(T1=6,T2=44,T3=196,T4=40)	T4	3.3478	TCGA-AA-3511-01
COAD(T1=6,T2=44,T3=196,T4=40)	T3	3.9801	TCGA-QG-A5YX-01
COAD(T1=6,T2=44,T3=196,T4=40)	T3	3.3177	TCGA-G4-6320-01
COAD(T1=6,T2=44,T3=196,T4=40)	T3	3.4569	TCGA-CM-6164-01
COAD(T1=6,T2=44,T3=196,T4=40)	T3	3.1261	TCGA-A6-A567-01
COAD(T1=6,T2=44,T3=196,T4=40)	T3	2.7868	TCGA-DM-A0X9-01
COAD(T1=6,T2=44,T3=196,T4=40)	T3	2.7227	TCGA-AY-A69D-01
COAD(T1=6,T2=44,T3=196,T4=40)	T3	1.6964	TCGA-AY-A8YK-01
COAD(T1=6,T2=44,T3=196,T4=40)	T3	3.9506	TCGA-5M-AAT4-01
COAD(T1=6,T2=44,T3=196,T4=40)	T3	4.0304	TCGA-CM-6167-01
COAD(T1=6,T2=44,T3=196,T4=40)	T3	3.2328	TCGA-CM-6168-01
COAD(T1=6,T2=44,T3=196,T4=40)	T3	3.2496	TCGA-AA-3697-01
COAD(T1=6,T2=44,T3=196,T4=40)	T3	3.6827	TCGA-AZ-4615-01
COAD(T1=6,T2=44,T3=196,T4=40)	T3	2.7636	TCGA-AZ-6598-01
COAD(T1=6,T2=44,T3=196,T4=40)	T2	3.47	TCGA-A6-6653-01
COAD(T1=6,T2=44,T3=196,T4=40)	T3	3.7291	TCGA-NH-A50V-01
COAD(T1=6,T2=44,T3=196,T4=40)	T4	3.8105	TCGA-AD-6899-01
COAD(T1=6,T2=44,T3=196,T4=40)	T3	3.9865	TCGA-G4-6311-01
COAD(T1=6,T2=44,T3=196,T4=40)	T4	2.0218	TCGA-NH-A6GC-01
COAD(T1=6,T2=44,T3=196,T4=40)	T3	3.927	TCGA-F4-6570-01
COAD(T1=6,T2=44,T3=196,T4=40)	T3	3.9175	TCGA-G4-6627-01
COAD(T1=6,T2=44,T3=196,T4=40)	T3	3.573	TCGA-CM-6679-01
COAD(T1=6,T2=44,T3=196,T4=40)	T3	3.3506	TCGA-A6-4105-01
COAD(T1=6,T2=44,T3=196,T4=40)	T3	3.9108	TCGA-D5-6924-01
COAD(T1=6,T2=44,T3=196,T4=40)	T4	4.2281	TCGA-AD-6965-01
COAD(T1=6,T2=44,T3=196,T4=40)	T4	3.7539	TCGA-D5-6931-01
COAD(T1=6,T2=44,T3=196,T4=40)	T2	3.3211	TCGA-A6-5656-01
COAD(T1=6,T2=44,T3=196,T4=40)	T3	3.2572	TCGA-DM-A1DA-01
COAD(T1=6,T2=44,T3=196,T4=40)	T4	2.5036	TCGA-F4-6461-01
COAD(T1=6,T2=44,T3=196,T4=40)	T3	3.4583	TCGA-F4-6703-01
COAD(T1=6,T2=44,T3=196,T4=40)	T3	4.1228	TCGA-AA-3492-01
COAD(T1=6,T2=44,T3=196,T4=40)	T3	3.8249	TCGA-G4-6293-01
COAD(T1=6,T2=44,T3=196,T4=40)	T3	3.0252	TCGA-AA-3496-01
COAD(T1=6,T2=44,T3=196,T4=40)	T3	3.7593	TCGA-G4-6625-01
COAD(T1=6,T2=44,T3=196,T4=40)	T3	2.9893	TCGA-DM-A28E-01
COAD(T1=6,T2=44,T3=196,T4=40)	T3	3.5779	TCGA-CK-6747-01
COAD(T1=6,T2=44,T3=196,T4=40)	T3	3.3119	TCGA-CA-5255-01
COAD(T1=6,T2=44,T3=196,T4=40)	T4	3.74	TCGA-CK-4947-01
COAD(T1=6,T2=44,T3=196,T4=40)	T3	4.0269	TCGA-AD-6888-01
COAD(T1=6,T2=44,T3=196,T4=40)	T3	3.705	TCGA-F4-6809-01
COAD(T1=6,T2=44,T3=196,T4=40)	T3	2.8219	TCGA-CK-5914-01
COAD(T1=6,T2=44,T3=196,T4=40)	T3	3.7193	TCGA-D5-6532-01
COAD(T1=6,T2=44,T3=196,T4=40)	T2	4.3227	TCGA-3L-AA1B-01
COAD(T1=6,T2=44,T3=196,T4=40)	T3	1.5266	TCGA-G4-6588-01
COAD(T1=6,T2=44,T3=196,T4=40)	T2	4.2862	TCGA-A6-6138-01
COAD(T1=6,T2=44,T3=196,T4=40)	T1	3.8085	TCGA-F4-6808-01
COAD(T1=6,T2=44,T3=196,T4=40)	T3	4.4101	TCGA-G4-6317-01
COAD(T1=6,T2=44,T3=196,T4=40)	T4	2.9262	TCGA-CK-4952-01
COAD(T1=6,T2=44,T3=196,T4=40)	T3	2.7007	TCGA-G4-6309-01
COAD(T1=6,T2=44,T3=196,T4=40)	T4	3.5923	TCGA-CM-5868-01
COAD(T1=6,T2=44,T3=196,T4=40)	T4	3.3633	TCGA-AD-6964-01
COAD(T1=6,T2=44,T3=196,T4=40)	T3	2.1957	TCGA-G4-6295-01
COAD(T1=6,T2=44,T3=196,T4=40)	T3	2.8858	TCGA-NH-A50T-01
COAD(T1=6,T2=44,T3=196,T4=40)	T3	3.8876	TCGA-D5-5539-01
COAD(T1=6,T2=44,T3=196,T4=40)	T3	3.4344	TCGA-AZ-4315-01
COAD(T1=6,T2=44,T3=196,T4=40)	T2	4.3965	TCGA-AA-3506-01
COAD(T1=6,T2=44,T3=196,T4=40)	T3	3.2811	TCGA-G4-6314-01
COAD(T1=6,T2=44,T3=196,T4=40)	T2	3.1377	TCGA-AU-6004-01
COAD(T1=6,T2=44,T3=196,T4=40)	T3	3.4804	TCGA-AY-6386-01
COAD(T1=6,T2=44,T3=196,T4=40)	T3	1.04568	TCGA-A6-5661-01
COAD(T1=6,T2=44,T3=196,T4=40)	T3	3.9865	TCGA-CA-5797-01
COAD(T1=6,T2=44,T3=196,T4=40)	T3	3.0515	TCGA-A6-5662-01
COAD(T1=6,T2=44,T3=196,T4=40)	T3	3.695	TCGA-AA-3489-01
COAD(T1=6,T2=44,T3=196,T4=40)	T3	3.4088	TCGA-DM-A1D8-01
COAD(T1=6,T2=44,T3=196,T4=40)	T2	4.1161	TCGA-AZ-6599-01
COAD(T1=6,T2=44,T3=196,T4=40)	T3	4.2419	TCGA-G4-6299-01
COAD(T1=6,T2=44,T3=196,T4=40)	T2	3.1588	TCGA-AD-5900-01
COAD(T1=6,T2=44,T3=196,T4=40)	T4	2.3451	TCGA-A6-5666-01
COAD(T1=6,T2=44,T3=196,T4=40)	T3	3.5645	TCGA-DM-A1D7-01
COAD(T1=6,T2=44,T3=196,T4=40)	T2	3.8157	TCGA-AA-A02Y-01
COAD(T1=6,T2=44,T3=196,T4=40)	T2	4.3793	TCGA-CM-6676-01
COAD(T1=6,T2=44,T3=196,T4=40)	T3	4.3548	TCGA-G4-6626-01
COAD(T1=6,T2=44,T3=196,T4=40)	T3	3.417	TCGA-AA-3660-01
COAD(T1=6,T2=44,T3=196,T4=40)	T3	3.9901	TCGA-NH-A8F7-01
COAD(T1=6,T2=44,T3=196,T4=40)	T3	4.4404	TCGA-AA-3712-01
COAD(T1=6,T2=44,T3=196,T4=40)	T3	2.578	TCGA-CM-4743-01
COAD(T1=6,T2=44,T3=196,T4=40)	T3	3.2526	TCGA-G4-6315-01
COAD(T1=6,T2=44,T3=196,T4=40)	T4	3.616	TCGA-CM-4747-01
COAD(T1=6,T2=44,T3=196,T4=40)	T4	3.1409	TCGA-AZ-6606-01
COAD(T1=6,T2=44,T3=196,T4=40)	T3	4.1883	TCGA-DM-A285-01
COAD(T1=6,T2=44,T3=196,T4=40)	T3	2.9875	TCGA-A6-6142-01
COAD(T1=6,T2=44,T3=196,T4=40)	T2	2.7487	TCGA-CM-6171-01
COAD(T1=6,T2=44,T3=196,T4=40)	T3	3.7635	TCGA-A6-2675-01
COAD(T1=6,T2=44,T3=196,T4=40)	T4	3.4765	TCGA-G4-6298-01
COAD(T1=6,T2=44,T3=196,T4=40)	T1	4.149	TCGA-CM-6163-01
COAD(T1=6,T2=44,T3=196,T4=40)	T3	2.3797	TCGA-A6-6650-01
COAD(T1=6,T2=44,T3=196,T4=40)	T4	4.8635	TCGA-AM-5820-01
COAD(T1=6,T2=44,T3=196,T4=40)	T3	3.1245	TCGA-A6-6654-01
COAD(T1=6,T2=44,T3=196,T4=40)	T2	2.7784	TCGA-CK-5912-01
COAD(T1=6,T2=44,T3=196,T4=40)	T3	3.6961	TCGA-CM-5349-01
COAD(T1=6,T2=44,T3=196,T4=40)	T3	3.4264	TCGA-DM-A28A-01
COAD(T1=6,T2=44,T3=196,T4=40)	T3	3.4687	TCGA-WS-AB45-01
COAD(T1=6,T2=44,T3=196,T4=40)	T3	2.6325	TCGA-CM-6677-01
COAD(T1=6,T2=44,T3=196,T4=40)	T2	3.5803	TCGA-AD-6548-01
COAD(T1=6,T2=44,T3=196,T4=40)	T3	4.0488	TCGA-AA-3509-01
COAD(T1=6,T2=44,T3=196,T4=40)	T4	3.506	TCGA-D5-6926-01
COAD(T1=6,T2=44,T3=196,T4=40)	T3	3.0842	TCGA-AZ-4616-01
COAD(T1=6,T2=44,T3=196,T4=40)	T4	4.8182	TCGA-AA-A02K-01
COAD(T1=6,T2=44,T3=196,T4=40)	T2	4.0357	TCGA-D5-6898-01
COAD(T1=6,T2=44,T3=196,T4=40)	T3	3.8421	TCGA-A6-2685-01
COAD(T1=6,T2=44,T3=196,T4=40)	T3	3.7888	TCGA-DM-A1HA-01
COAD(T1=6,T2=44,T3=196,T4=40)	T3	3.6771	TCGA-DM-A280-01
COAD(T1=6,T2=44,T3=196,T4=40)	T3	4.061	TCGA-AA-3713-01
COAD(T1=6,T2=44,T3=196,T4=40)	T2	3.6555	TCGA-AA-3502-01
COAD(T1=6,T2=44,T3=196,T4=40)	T3	3.0002	TCGA-CK-5913-01
COAD(T1=6,T2=44,T3=196,T4=40)	T4	4.468	TCGA-4N-A93T-01
COAD(T1=6,T2=44,T3=196,T4=40)	T3	3.9079	TCGA-F4-6855-01
COAD(T1=6,T2=44,T3=196,T4=40)	T4	3.2328	TCGA-QG-A5YV-01
COAD(T1=6,T2=44,T3=196,T4=40)	T2	4.0366	TCGA-CM-6166-01
COAD(T1=6,T2=44,T3=196,T4=40)	T2	3.8451	TCGA-G4-6321-01
COAD(T1=6,T2=44,T3=196,T4=40)	T3	3.8095	TCGA-D5-6539-01
COAD(T1=6,T2=44,T3=196,T4=40)	T3	4.6136	TCGA-CM-5344-01
COAD(T1=6,T2=44,T3=196,T4=40)	T3	1.31089	TCGA-A6-2674-01
COAD(T1=6,T2=44,T3=196,T4=40)	T3	3.2587	TCGA-D5-6536-01
COAD(T1=6,T2=44,T3=196,T4=40)	T3	3.8126	TCGA-A6-6140-01
COAD(T1=6,T2=44,T3=196,T4=40)	T4	3.7182	TCGA-A6-A566-01
COAD(T1=6,T2=44,T3=196,T4=40)	T3	3.7028	TCGA-A6-6141-01
COAD(T1=6,T2=44,T3=196,T4=40)	T3	4.1269	TCGA-D5-5541-01
COAD(T1=6,T2=44,T3=196,T4=40)	T3	2.5163	TCGA-AM-5821-01
COAD(T1=6,T2=44,T3=196,T4=40)	T3	3.2826	TCGA-AD-6901-01
COAD(T1=6,T2=44,T3=196,T4=40)	T2	3.1458	TCGA-CM-6161-01
COAD(T1=6,T2=44,T3=196,T4=40)	T3	2.4753	TCGA-CK-6748-01
COAD(T1=6,T2=44,T3=196,T4=40)	T2	2.6602	TCGA-D5-6540-01
COAD(T1=6,T2=44,T3=196,T4=40)	T3	3.3336	TCGA-AZ-4684-01
COAD(T1=6,T2=44,T3=196,T4=40)	T4	4.1844	TCGA-5M-AAT6-01
COAD(T1=6,T2=44,T3=196,T4=40)	T3	3.6474	TCGA-G4-6302-01
COAD(T1=6,T2=44,T3=196,T4=40)	T3	3.5124	TCGA-G4-6310-01
COAD(T1=6,T2=44,T3=196,T4=40)	T4	4.7165	TCGA-NH-A6GA-01
COAD(T1=6,T2=44,T3=196,T4=40)	T3	4.1335	TCGA-AA-3655-01
COAD(T1=6,T2=44,T3=196,T4=40)	T3	3.9947	TCGA-A6-6652-01
COAD(T1=6,T2=44,T3=196,T4=40)	T3	3.9356	TCGA-CM-5863-01
COAD(T1=6,T2=44,T3=196,T4=40)	T4	3.5009	TCGA-CM-6678-01
COAD(T1=6,T2=44,T3=196,T4=40)	T3	3.8935	TCGA-D5-6529-01
COAD(T1=6,T2=44,T3=196,T4=40)	T3	4.0171	TCGA-T9-A92H-01
COAD(T1=6,T2=44,T3=196,T4=40)	T3	4.4384	TCGA-A6-5657-01
COAD(T1=6,T2=44,T3=196,T4=40)	T3	2.5263	TCGA-D5-6930-01
COAD(T1=6,T2=44,T3=196,T4=40)	T2	2.8897	TCGA-QL-A97D-01
COAD(T1=6,T2=44,T3=196,T4=40)	T2	3.7094	TCGA-D5-7000-01
COAD(T1=6,T2=44,T3=196,T4=40)	T3	3.5523	TCGA-D5-5537-01
COAD(T1=6,T2=44,T3=196,T4=40)	T3	3.034	TCGA-CM-5860-01
COAD(T1=6,T2=44,T3=196,T4=40)	T3	3.9783	TCGA-AA-A01P-01
COAD(T1=6,T2=44,T3=196,T4=40)	T3	3.6612	TCGA-CK-4950-01
COAD(T1=6,T2=44,T3=196,T4=40)	T4	1.2696	TCGA-SS-A7HO-01
COAD(T1=6,T2=44,T3=196,T4=40)	T3	4.2676	TCGA-D5-6537-01
COAD(T1=6,T2=44,T3=196,T4=40)	T3	3.9892	TCGA-CA-5254-01
COAD(T1=6,T2=44,T3=196,T4=40)	T2	3.0774	TCGA-AD-A5EK-01
COAD(T1=6,T2=44,T3=196,T4=40)	T4	3.1212	TCGA-CK-6746-01
COAD(T1=6,T2=44,T3=196,T4=40)	T3	3.506	TCGA-CA-6718-01
COAD(T1=6,T2=44,T3=196,T4=40)	T3	3.245	TCGA-AY-5543-01
COAD(T1=6,T2=44,T3=196,T4=40)	T3	3.2722	TCGA-F4-6807-01
COAD(T1=6,T2=44,T3=196,T4=40)	T2	3.728	TCGA-CK-5915-01
COAD(T1=6,T2=44,T3=196,T4=40)	T3	1.84842	TCGA-A6-3810-01
COAD(T1=6,T2=44,T3=196,T4=40)	T4	2.484	TCGA-A6-6781-01
COAD(T1=6,T2=44,T3=196,T4=40)	T4	4.1111	TCGA-NH-A50U-01
COAD(T1=6,T2=44,T3=196,T4=40)	T3	4.5318	TCGA-AU-3779-01
COAD(T1=6,T2=44,T3=196,T4=40)	T3	3.8391	TCGA-DM-A1D4-01
COAD(T1=6,T2=44,T3=196,T4=40)	T4	3.3814	TCGA-G4-6304-01
COAD(T1=6,T2=44,T3=196,T4=40)	T3	4.1724	TCGA-CA-6717-01
COAD(T1=6,T2=44,T3=196,T4=40)	T3	4.5429	TCGA-DM-A1D0-01
COAD(T1=6,T2=44,T3=196,T4=40)	T3	4.4523	TCGA-CM-6675-01
COAD(T1=6,T2=44,T3=196,T4=40)	T1	3.1311	TCGA-AZ-4313-01
COAD(T1=6,T2=44,T3=196,T4=40)	T3	3.8571	TCGA-G4-6307-01
COAD(T1=6,T2=44,T3=196,T4=40)	T3	3.2752	TCGA-AZ-5403-01
COAD(T1=6,T2=44,T3=196,T4=40)	T3	3.7083	TCGA-CM-5861-01
COAD(T1=6,T2=44,T3=196,T4=40)	T3	3.8915	TCGA-CA-5796-01
COAD(T1=6,T2=44,T3=196,T4=40)	T4	3.1653	TCGA-AZ-4323-01
COAD(T1=6,T2=44,T3=196,T4=40)	T3	3.7302	TCGA-D5-6928-01
COAD(T1=6,T2=44,T3=196,T4=40)	T3	2.874	TCGA-AA-3685-01
COAD(T1=6,T2=44,T3=196,T4=40)	T4	3.4817	TCGA-A6-5664-01
COAD(T1=6,T2=44,T3=196,T4=40)	T1	3.9552	TCGA-AZ-5407-01
COAD(T1=6,T2=44,T3=196,T4=40)	T3	4.0739	TCGA-AY-6196-01
COAD(T1=6,T2=44,T3=196,T4=40)	T3	3.2143	TCGA-D5-6920-01
COAD(T1=6,T2=44,T3=196,T4=40)	T3	3.7656	TCGA-G4-6297-01
COAD(T1=6,T2=44,T3=196,T4=40)	T3	3.6578	TCGA-A6-2686-01
COAD(T1=6,T2=44,T3=196,T4=40)	T3	4.0019	TCGA-DM-A28F-01
COAD(T1=6,T2=44,T3=196,T4=40)	T3	2.1313	TCGA-CA-5256-01
COAD(T1=6,T2=44,T3=196,T4=40)	T4	3.6543	TCGA-A6-2682-01
COAD(T1=6,T2=44,T3=196,T4=40)	T2	3.5572	TCGA-AZ-6608-01
COAD(T1=6,T2=44,T3=196,T4=40)	T2	3.7226	TCGA-G4-6306-01
COAD(T1=6,T2=44,T3=196,T4=40)	T3	4.4938	TCGA-D5-6922-01
COAD(T1=6,T2=44,T3=196,T4=40)	T1	2.9948	TCGA-CK-5916-01
COAD(T1=6,T2=44,T3=196,T4=40)	T3	3.7815	TCGA-DM-A288-01
COAD(T1=6,T2=44,T3=196,T4=40)	T3	2.3871	TCGA-DM-A1HB-01
COAD(T1=6,T2=44,T3=196,T4=40)	T2	3.74	TCGA-CM-6170-01
COAD(T1=6,T2=44,T3=196,T4=40)	T3	4.63	TCGA-CK-4948-01
COAD(T1=6,T2=44,T3=196,T4=40)	T4	3.1813	TCGA-AA-3662-01
COAD(T1=6,T2=44,T3=196,T4=40)	T3	4.0251	TCGA-CM-6165-01
COAD(T1=6,T2=44,T3=196,T4=40)	T2	3.3293	TCGA-F4-6856-01
COAD(T1=6,T2=44,T3=196,T4=40)	T2	3.8411	TCGA-F4-6569-01
COAD(T1=6,T2=44,T3=196,T4=40)	T3	4.5053	TCGA-D5-6535-01
COAD(T1=6,T2=44,T3=196,T4=40)	T2	3.1491	TCGA-AA-3526-01
COAD(T1=6,T2=44,T3=196,T4=40)	T3	3.7269	TCGA-AD-6895-01
COAD(T1=6,T2=44,T3=196,T4=40)	T4	3.2236	TCGA-NH-A8F8-01
COAD(T1=6,T2=44,T3=196,T4=40)	T3	3.8259	TCGA-D5-6929-01
COAD(T1=6,T2=44,T3=196,T4=40)	T3	4.0952	TCGA-A6-5667-01
COAD(T1=6,T2=44,T3=196,T4=40)	T3	3.4945	TCGA-CM-6169-01
COAD(T1=6,T2=44,T3=196,T4=40)	T3	3.7226	TCGA-CM-6680-01
COAD(T1=6,T2=44,T3=196,T4=40)	T3	2.7826	TCGA-AA-3663-01
COAD(T1=6,T2=44,T3=196,T4=40)	T3	4.3562	TCGA-A6-6648-01
COAD(T1=6,T2=44,T3=196,T4=40)	T3	2.9747	TCGA-RU-A8FL-01
COAD(T1=6,T2=44,T3=196,T4=40)	T3	4.1111	TCGA-CA-6719-01
COAD(T1=6,T2=44,T3=196,T4=40)	T3	3.7421	TCGA-A6-6649-01
COAD(T1=6,T2=44,T3=196,T4=40)	T3	2.8622	TCGA-NH-A6GB-01
COAD(T1=6,T2=44,T3=196,T4=40)	T4	3.7898	TCGA-AZ-4614-01
COAD(T1=6,T2=44,T3=196,T4=40)	T4	0.619183	TCGA-A6-3809-01
COAD(T1=6,T2=44,T3=196,T4=40)	T2	2.1894	TCGA-CM-5864-01
COAD(T1=6,T2=44,T3=196,T4=40)	T3	3.2988	TCGA-D5-6927-01
COAD(T1=6,T2=44,T3=196,T4=40)	T3	3.3032	TCGA-QG-A5YW-01
COAD(T1=6,T2=44,T3=196,T4=40)	T2	3.9393	TCGA-AA-A01X-01
COAD(T1=6,T2=44,T3=196,T4=40)	T3	3.38	TCGA-D5-6538-01
COAD(T1=6,T2=44,T3=196,T4=40)	T3	4.0366	TCGA-CM-6172-01
COAD(T1=6,T2=44,T3=196,T4=40)	T4	4.0584	TCGA-D5-6533-01
COAD(T1=6,T2=44,T3=196,T4=40)	T3	3.6759	TCGA-DM-A28H-01
COAD(T1=6,T2=44,T3=196,T4=40)	T3	3.0252	TCGA-F4-6460-01
COAD(T1=6,T2=44,T3=196,T4=40)	T3	2.3135	TCGA-D5-5540-01
COAD(T1=6,T2=44,T3=196,T4=40)	T3	1.24852	TCGA-A6-2672-01
COAD(T1=6,T2=44,T3=196,T4=40)	T3	3.8561	TCGA-F4-6463-01
COAD(T1=6,T2=44,T3=196,T4=40)	T4	4.2312	TCGA-AZ-6600-01
COAD(T1=6,T2=44,T3=196,T4=40)	T2	3.5621	TCGA-D5-6530-01
COAD(T1=6,T2=44,T3=196,T4=40)	T3	4.1547	TCGA-G4-6303-01
COAD(T1=6,T2=44,T3=196,T4=40)	T2	3.6928	TCGA-D5-6923-01
COAD(T1=6,T2=44,T3=196,T4=40)	T3	3.0893	TCGA-AZ-4682-01
COAD(T1=6,T2=44,T3=196,T4=40)	T3	3.4424	TCGA-G4-6586-01
COAD(T1=6,T2=44,T3=196,T4=40)	T1	4.1708	TCGA-AD-6890-01
COAD(T1=6,T2=44,T3=196,T4=40)	T3	2.2603	TCGA-AD-6889-01
COAD(T1=6,T2=44,T3=196,T4=40)	T3	2.8199	TCGA-DM-A28K-01
COAD(T1=6,T2=44,T3=196,T4=40)	T2	3.6589	TCGA-QG-A5Z2-01
COAD(T1=6,T2=44,T3=196,T4=40)	T3	3.7171	TCGA-G4-6294-01
COAD(T1=6,T2=44,T3=196,T4=40)	T3	3.421	TCGA-QG-A5Z1-01
COAD(T1=6,T2=44,T3=196,T4=40)	T2	4.2103	TCGA-G4-6628-01
COAD(T1=6,T2=44,T3=196,T4=40)	T3	4.1474	TCGA-D5-6534-01
COAD(T1=6,T2=44,T3=196,T4=40)	T3	4.3527	TCGA-DM-A1DB-01
COAD(T1=6,T2=44,T3=196,T4=40)	T2	2.68052	TCGA-A6-5659-01
COAD(T1=6,T2=44,T3=196,T4=40)	T3	3.7017	TCGA-A6-5660-01
COAD(T1=6,T2=44,T3=196,T4=40)	T3	2.3871	TCGA-CM-5862-01
COAD(T1=6,T2=44,T3=196,T4=40)	T3	3.7237	TCGA-F4-6805-01
COAD(T1=6,T2=44,T3=196,T4=40)	T3	4.1571	TCGA-CK-4951-01
COAD(T1=6,T2=44,T3=196,T4=40)	T3	3.7496	TCGA-F4-6704-01
COAD(T1=6,T2=44,T3=196,T4=40)	T2	3.5935	TCGA-CK-6751-01
COAD(T1=6,T2=44,T3=196,T4=40)	T3	2.6418	TCGA-AD-A5EJ-01
COAD(T1=6,T2=44,T3=196,T4=40)	T3	2.872	TCGA-CA-6716-01
COAD(T1=6,T2=44,T3=196,T4=40)	T3	3.5399	TCGA-AA-A01Z-01
COAD(T1=6,T2=44,T3=196,T4=40)	T2	3.8157	TCGA-F4-6806-01
COAD(T1=6,T2=44,T3=196,T4=40)	T3	3.1212	TCGA-D5-6531-01
COAD(T1=6,T2=44,T3=196,T4=40)	T3	3.4237	TCGA-DM-A1D9-01
COAD(T1=6,T2=44,T3=196,T4=40)	T3	3.4451	TCGA-DM-A0XF-01
COAD(T1=6,T2=44,T3=196,T4=40)	T2	3.6347	TCGA-AZ-6603-01
COAD(T1=6,T2=44,T3=196,T4=40)	T3	3.6905	TCGA-A6-A5ZU-01
COAD(T1=6,T2=44,T3=196,T4=40)	T3	3.5312	TCGA-NH-A5IV-01
COAD(T1=6,T2=44,T3=196,T4=40)	T3	3.5399	TCGA-A6-6651-01
COAD(T1=6,T2=44,T3=196,T4=40)	T3	2.9929	TCGA-CA-6715-01
COAD(T1=6,T2=44,T3=196,T4=40)	T3	3.3731	TCGA-CM-6674-01
COAD(T1=6,T2=44,T3=196,T4=40)	T3	2.4544	TCGA-D5-6932-01
COAD(T1=6,T2=44,T3=196,T4=40)	T3	4.4437	TCGA-A6-6137-01
COAD(T1=6,T2=44,T3=196,T4=40)	T3	4.2929	TCGA-DM-A28M-01
COAD(T1=6,T2=44,T3=196,T4=40)	T3	3.5935	TCGA-F4-6459-01
COAD(T1=6,T2=44,T3=196,T4=40)	T2	2.03244	TCGA-A6-2684-01
COAD(T1=6,T2=44,T3=196,T4=40)	T3	3.13329	TCGA-A6-6780-01
COAD(T1=6,T2=44,T3=196,T4=40)	T4	4.2281	TCGA-AZ-6607-01
COAD(T1=6,T2=44,T3=196,T4=40)	T3	2.6232	TCGA-G4-6322-01
COAD(T1=6,T2=44,T3=196,T4=40)	T3	2.9839	TCGA-A6-A565-01
COAD(T1=6,T2=44,T3=196,T4=40)	T3	3.0637	TCGA-A6-A56B-01
COAD(T1=6,T2=44,T3=196,T4=40)	T2	3.0428	TCGA-AY-A54L-01
COAD(T1=6,T2=44,T3=196,T4=40)	T2	4.0037	TCGA-AA-3495-01
COAD(T1=6,T2=44,T3=196,T4=40)	T3	2.28617	TCGA-A6-5665-01
COAD(T1=6,T2=44,T3=196,T4=40)	T3	1.72512	TCGA-A6-2677-01
COAD(T1=6,T2=44,T3=196,T4=40)	T3	3.6172	TCGA-CM-6162-01
COAD(T1=6,T2=44,T3=196,T4=40)	T3	3.928	TCGA-AD-6963-01
COAD(T1=6,T2=44,T3=196,T4=40)	T3	3.2297	TCGA-AY-6197-01
COAD(T1=6,T2=44,T3=196,T4=40)	T3	3.831	TCGA-D5-6541-01
COAD(T1=6,T2=44,T3=196,T4=40)	T3	4.1061	TCGA-CM-5348-01
COAD(T1=6,T2=44,T3=196,T4=40)	T3	3.4713	TCGA-4T-AA8H-01
COAD(T1=6,T2=44,T3=196,T4=40)	T3	3.8739	TCGA-DM-A28G-01
COAD(T1=6,T2=44,T3=196,T4=40)	T3	3.0944	TCGA-5M-AATE-01
COAD(T1=6,T2=44,T3=196,T4=40)	T3	3.6066	TCGA-DM-A28C-01
COAD(T1=6,T2=44,T3=196,T4=40)	T3	3.4843	TCGA-DM-A0XD-01
COAD(T1=6,T2=44,T3=196,T4=40)	T3	3.755	TCGA-DM-A282-01
COAD(T1=6,T2=44,T3=196,T4=40)	T2	3.1908	TCGA-CM-4744-01
COAD(T1=6,T2=44,T3=196,T4=40)	T4	3.7127	TCGA-AZ-6605-01
COAD(T1=6,T2=44,T3=196,T4=40)	T3	4.0144	TCGA-AZ-6601-01
COAD(T1=6,T2=44,T3=196,T4=40)	T2	3.9261	TCGA-AY-A71X-01
COAD(T1=6,T2=44,T3=196,T4=40)	T3	3.2034	TCGA-AA-3675-01
COAD(T1=6,T2=44,T3=196,T4=40)	T4	3.3689	TCGA-A6-6782-01
COAD(T1=6,T2=44,T3=196,T4=40)	T3	3.838	TCGA-CM-4751-01
COADREAD(T1=10,T2=57,T3=259,T4=50)	T3	3.1604	TCGA-F4-6854-01
COADREAD(T1=10,T2=57,T3=259,T4=50)	T3	3.1278	TCGA-D5-5538-01
COADREAD(T1=10,T2=57,T3=259,T4=50)	T4	3.3478	TCGA-AA-3511-01
COADREAD(T1=10,T2=57,T3=259,T4=50)	T3	3.1955	TCGA-EI-6512-01
COADREAD(T1=10,T2=57,T3=259,T4=50)	T3	3.9801	TCGA-QG-A5YX-01
COADREAD(T1=10,T2=57,T3=259,T4=50)	T3	3.3177	TCGA-G4-6320-01
COADREAD(T1=10,T2=57,T3=259,T4=50)	T3	3.4569	TCGA-CM-6164-01
COADREAD(T1=10,T2=57,T3=259,T4=50)	T3	3.1261	TCGA-A6-A567-01
COADREAD(T1=10,T2=57,T3=259,T4=50)	T4	3.3842	TCGA-F5-6863-01
COADREAD(T1=10,T2=57,T3=259,T4=50)	T3	2.7868	TCGA-DM-A0X9-01
COADREAD(T1=10,T2=57,T3=259,T4=50)	T3	2.7227	TCGA-AY-A69D-01
COADREAD(T1=10,T2=57,T3=259,T4=50)	T3	1.6964	TCGA-AY-A8YK-01
COADREAD(T1=10,T2=57,T3=259,T4=50)	T3	3.9506	TCGA-5M-AAT4-01
COADREAD(T1=10,T2=57,T3=259,T4=50)	T3	4.0304	TCGA-CM-6167-01
COADREAD(T1=10,T2=57,T3=259,T4=50)	T1	2.8582	TCGA-DC-5337-01
COADREAD(T1=10,T2=57,T3=259,T4=50)	T3	3.2328	TCGA-CM-6168-01
COADREAD(T1=10,T2=57,T3=259,T4=50)	T3	3.2496	TCGA-AA-3697-01
COADREAD(T1=10,T2=57,T3=259,T4=50)	T3	3.6827	TCGA-AZ-4615-01
COADREAD(T1=10,T2=57,T3=259,T4=50)	T3	2.7636	TCGA-AZ-6598-01
COADREAD(T1=10,T2=57,T3=259,T4=50)	T2	3.47	TCGA-A6-6653-01
COADREAD(T1=10,T2=57,T3=259,T4=50)	T3	3.7291	TCGA-NH-A50V-01
COADREAD(T1=10,T2=57,T3=259,T4=50)	T4	3.8105	TCGA-AD-6899-01
COADREAD(T1=10,T2=57,T3=259,T4=50)	T3	3.5199	TCGA-DC-6682-01
COADREAD(T1=10,T2=57,T3=259,T4=50)	T3	3.9865	TCGA-G4-6311-01
COADREAD(T1=10,T2=57,T3=259,T4=50)	T3	1.9188	TCGA-CI-6619-01
COADREAD(T1=10,T2=57,T3=259,T4=50)	T3	3.6928	TCGA-AF-3911-01
COADREAD(T1=10,T2=57,T3=259,T4=50)	T4	2.9674	TCGA-CI-6622-01
COADREAD(T1=10,T2=57,T3=259,T4=50)	T4	2.0218	TCGA-NH-A6GC-01
COADREAD(T1=10,T2=57,T3=259,T4=50)	T3	3.927	TCGA-F4-6570-01
COADREAD(T1=10,T2=57,T3=259,T4=50)	T3	3.9175	TCGA-G4-6627-01
COADREAD(T1=10,T2=57,T3=259,T4=50)	T3	3.573	TCGA-CM-6679-01
COADREAD(T1=10,T2=57,T3=259,T4=50)	T2	3.3966	TCGA-DC-6157-01
COADREAD(T1=10,T2=57,T3=259,T4=50)	T3	3.3506	TCGA-A6-4105-01
COADREAD(T1=10,T2=57,T3=259,T4=50)	T2	4.1111	TCGA-DC-6158-01
COADREAD(T1=10,T2=57,T3=259,T4=50)	T3	3.9108	TCGA-D5-6924-01
COADREAD(T1=10,T2=57,T3=259,T4=50)	T4	4.2281	TCGA-AD-6965-01
COADREAD(T1=10,T2=57,T3=259,T4=50)	T4	3.7539	TCGA-D5-6931-01
COADREAD(T1=10,T2=57,T3=259,T4=50)	T2	3.3211	TCGA-A6-5656-01
COADREAD(T1=10,T2=57,T3=259,T4=50)	T3	3.3478	TCGA-EI-6884-01
COADREAD(T1=10,T2=57,T3=259,T4=50)	T3	3.2572	TCGA-DM-A1DA-01
COADREAD(T1=10,T2=57,T3=259,T4=50)	T4	2.5036	TCGA-F4-6461-01
COADREAD(T1=10,T2=57,T3=259,T4=50)	T3	3.4583	TCGA-F4-6703-01
COADREAD(T1=10,T2=57,T3=259,T4=50)	T3	4.1228	TCGA-AA-3492-01
COADREAD(T1=10,T2=57,T3=259,T4=50)	T3	3.8249	TCGA-G4-6293-01
COADREAD(T1=10,T2=57,T3=259,T4=50)	T3	3.0252	TCGA-AA-3496-01
COADREAD(T1=10,T2=57,T3=259,T4=50)	T3	3.7593	TCGA-G4-6625-01
COADREAD(T1=10,T2=57,T3=259,T4=50)	T3	2.9893	TCGA-DM-A28E-01
COADREAD(T1=10,T2=57,T3=259,T4=50)	T3	3.5779	TCGA-CK-6747-01
COADREAD(T1=10,T2=57,T3=259,T4=50)	T3	3.4156	TCGA-F5-6702-01
COADREAD(T1=10,T2=57,T3=259,T4=50)	T3	3.3119	TCGA-CA-5255-01
COADREAD(T1=10,T2=57,T3=259,T4=50)	T4	3.74	TCGA-CK-4947-01
COADREAD(T1=10,T2=57,T3=259,T4=50)	T3	3.5249	TCGA-G5-6233-01
COADREAD(T1=10,T2=57,T3=259,T4=50)	T3	4.0269	TCGA-AD-6888-01
COADREAD(T1=10,T2=57,T3=259,T4=50)	T3	3.705	TCGA-F4-6809-01
COADREAD(T1=10,T2=57,T3=259,T4=50)	T3	2.8219	TCGA-CK-5914-01
COADREAD(T1=10,T2=57,T3=259,T4=50)	T3	3.7193	TCGA-D5-6532-01
COADREAD(T1=10,T2=57,T3=259,T4=50)	T2	4.3227	TCGA-3L-AA1B-01
COADREAD(T1=10,T2=57,T3=259,T4=50)	T2	3.8778	TCGA-EI-6510-01
COADREAD(T1=10,T2=57,T3=259,T4=50)	T3	1.5266	TCGA-G4-6588-01
COADREAD(T1=10,T2=57,T3=259,T4=50)	T1	3.0944	TCGA-AG-3742-01
COADREAD(T1=10,T2=57,T3=259,T4=50)	T2	4.2862	TCGA-A6-6138-01
COADREAD(T1=10,T2=57,T3=259,T4=50)	T1	3.8085	TCGA-F4-6808-01
COADREAD(T1=10,T2=57,T3=259,T4=50)	T3	4.4101	TCGA-G4-6317-01
COADREAD(T1=10,T2=57,T3=259,T4=50)	T4	2.9262	TCGA-CK-4952-01
COADREAD(T1=10,T2=57,T3=259,T4=50)	T3	2.7007	TCGA-G4-6309-01
COADREAD(T1=10,T2=57,T3=259,T4=50)	T4	3.5923	TCGA-CM-5868-01
COADREAD(T1=10,T2=57,T3=259,T4=50)	T4	3.9318	TCGA-DC-6156-01
COADREAD(T1=10,T2=57,T3=259,T4=50)	T3	4.6497	TCGA-AG-4021-01
COADREAD(T1=10,T2=57,T3=259,T4=50)	T4	3.3633	TCGA-AD-6964-01
COADREAD(T1=10,T2=57,T3=259,T4=50)	T3	2.1957	TCGA-G4-6295-01
COADREAD(T1=10,T2=57,T3=259,T4=50)	T3	2.8858	TCGA-NH-A50T-01
COADREAD(T1=10,T2=57,T3=259,T4=50)	T3	3.8876	TCGA-D5-5539-01
COADREAD(T1=10,T2=57,T3=259,T4=50)	T3	2.96	TCGA-AH-6903-01
COADREAD(T1=10,T2=57,T3=259,T4=50)	T3	3.7072	TCGA-EI-6882-01
COADREAD(T1=10,T2=57,T3=259,T4=50)	T3	3.4344	TCGA-AZ-4315-01
COADREAD(T1=10,T2=57,T3=259,T4=50)	T2	4.3965	TCGA-AA-3506-01
COADREAD(T1=10,T2=57,T3=259,T4=50)	T3	3.2811	TCGA-G4-6314-01
COADREAD(T1=10,T2=57,T3=259,T4=50)	T2	3.1377	TCGA-AU-6004-01
COADREAD(T1=10,T2=57,T3=259,T4=50)	T3	3.4804	TCGA-AY-6386-01
COADREAD(T1=10,T2=57,T3=259,T4=50)	T3	1.04568	TCGA-A6-5661-01
COADREAD(T1=10,T2=57,T3=259,T4=50)	T3	3.9865	TCGA-CA-5797-01
COADREAD(T1=10,T2=57,T3=259,T4=50)	T3	3.0515	TCGA-A6-5662-01
COADREAD(T1=10,T2=57,T3=259,T4=50)	T3	3.695	TCGA-AA-3489-01
COADREAD(T1=10,T2=57,T3=259,T4=50)	T3	3.3336	TCGA-AF-2687-01
COADREAD(T1=10,T2=57,T3=259,T4=50)	T3	3.4088	TCGA-DM-A1D8-01
COADREAD(T1=10,T2=57,T3=259,T4=50)	T2	4.1161	TCGA-AZ-6599-01
COADREAD(T1=10,T2=57,T3=259,T4=50)	T3	4.2419	TCGA-G4-6299-01
COADREAD(T1=10,T2=57,T3=259,T4=50)	T2	3.1588	TCGA-AD-5900-01
COADREAD(T1=10,T2=57,T3=259,T4=50)	T4	2.3451	TCGA-A6-5666-01
COADREAD(T1=10,T2=57,T3=259,T4=50)	T3	3.5645	TCGA-DM-A1D7-01
COADREAD(T1=10,T2=57,T3=259,T4=50)	T2	3.8157	TCGA-AA-A02Y-01
COADREAD(T1=10,T2=57,T3=259,T4=50)	T2	4.3793	TCGA-CM-6676-01
COADREAD(T1=10,T2=57,T3=259,T4=50)	T3	4.3548	TCGA-G4-6626-01
COADREAD(T1=10,T2=57,T3=259,T4=50)	T3	3.417	TCGA-AA-3660-01
COADREAD(T1=10,T2=57,T3=259,T4=50)	T3	3.9901	TCGA-NH-A8F7-01
COADREAD(T1=10,T2=57,T3=259,T4=50)	T4	3.1685	TCGA-EF-5830-01
COADREAD(T1=10,T2=57,T3=259,T4=50)	T3	4.4404	TCGA-AA-3712-01
COADREAD(T1=10,T2=57,T3=259,T4=50)	T3	2.578	TCGA-CM-4743-01
COADREAD(T1=10,T2=57,T3=259,T4=50)	T3	3.2526	TCGA-G4-6315-01
COADREAD(T1=10,T2=57,T3=259,T4=50)	T3	3.3759	TCGA-AF-6136-01
COADREAD(T1=10,T2=57,T3=259,T4=50)	T4	3.616	TCGA-CM-4747-01
COADREAD(T1=10,T2=57,T3=259,T4=50)	T3	2.8838	TCGA-DY-A1DD-01
COADREAD(T1=10,T2=57,T3=259,T4=50)	T4	3.1409	TCGA-AZ-6606-01
COADREAD(T1=10,T2=57,T3=259,T4=50)	T3	4.1883	TCGA-DM-A285-01
COADREAD(T1=10,T2=57,T3=259,T4=50)	T3	2.9875	TCGA-A6-6142-01
COADREAD(T1=10,T2=57,T3=259,T4=50)	T2	2.7487	TCGA-CM-6171-01
COADREAD(T1=10,T2=57,T3=259,T4=50)	T3	2.4412	TCGA-AF-A56L-01
COADREAD(T1=10,T2=57,T3=259,T4=50)	T3	3.7635	TCGA-A6-2675-01
COADREAD(T1=10,T2=57,T3=259,T4=50)	T4	3.4765	TCGA-G4-6298-01
COADREAD(T1=10,T2=57,T3=259,T4=50)	T1	4.149	TCGA-CM-6163-01
COADREAD(T1=10,T2=57,T3=259,T4=50)	T3	2.3797	TCGA-A6-6650-01
COADREAD(T1=10,T2=57,T3=259,T4=50)	T4	4.8635	TCGA-AM-5820-01
COADREAD(T1=10,T2=57,T3=259,T4=50)	T3	3.1245	TCGA-A6-6654-01
COADREAD(T1=10,T2=57,T3=259,T4=50)	T2	2.7784	TCGA-CK-5912-01
COADREAD(T1=10,T2=57,T3=259,T4=50)	T3	3.6961	TCGA-CM-5349-01
COADREAD(T1=10,T2=57,T3=259,T4=50)	T3	3.4264	TCGA-DM-A28A-01
COADREAD(T1=10,T2=57,T3=259,T4=50)	T3	2.8442	TCGA-AH-6549-01
COADREAD(T1=10,T2=57,T3=259,T4=50)	T3	3.7603	TCGA-EI-6507-01
COADREAD(T1=10,T2=57,T3=259,T4=50)	T3	3.2632	TCGA-AG-3592-01
COADREAD(T1=10,T2=57,T3=259,T4=50)	T1	4.1228	TCGA-G5-6641-01
COADREAD(T1=10,T2=57,T3=259,T4=50)	T3	4.1676	TCGA-EI-6508-01
COADREAD(T1=10,T2=57,T3=259,T4=50)	T3	3.4687	TCGA-WS-AB45-01
COADREAD(T1=10,T2=57,T3=259,T4=50)	T3	2.6325	TCGA-CM-6677-01
COADREAD(T1=10,T2=57,T3=259,T4=50)	T2	3.5803	TCGA-AD-6548-01
COADREAD(T1=10,T2=57,T3=259,T4=50)	T3	4.0488	TCGA-AA-3509-01
COADREAD(T1=10,T2=57,T3=259,T4=50)	T4	3.506	TCGA-D5-6926-01
COADREAD(T1=10,T2=57,T3=259,T4=50)	T3	3.0842	TCGA-AZ-4616-01
COADREAD(T1=10,T2=57,T3=259,T4=50)	T4	4.8182	TCGA-AA-A02K-01
COADREAD(T1=10,T2=57,T3=259,T4=50)	T2	4.0357	TCGA-D5-6898-01
COADREAD(T1=10,T2=57,T3=259,T4=50)	T3	3.8421	TCGA-A6-2685-01
COADREAD(T1=10,T2=57,T3=259,T4=50)	T3	3.7836	TCGA-DC-6681-01
COADREAD(T1=10,T2=57,T3=259,T4=50)	T3	3.7888	TCGA-DM-A1HA-01
COADREAD(T1=10,T2=57,T3=259,T4=50)	T3	3.6771	TCGA-DM-A280-01
COADREAD(T1=10,T2=57,T3=259,T4=50)	T3	4.061	TCGA-AA-3713-01
COADREAD(T1=10,T2=57,T3=259,T4=50)	T2	3.6555	TCGA-AA-3502-01
COADREAD(T1=10,T2=57,T3=259,T4=50)	T3	3.0002	TCGA-CK-5913-01
COADREAD(T1=10,T2=57,T3=259,T4=50)	T4	4.468	TCGA-4N-A93T-01
COADREAD(T1=10,T2=57,T3=259,T4=50)	T3	3.9079	TCGA-F4-6855-01
COADREAD(T1=10,T2=57,T3=259,T4=50)	T4	3.2328	TCGA-QG-A5YV-01
COADREAD(T1=10,T2=57,T3=259,T4=50)	T2	4.0366	TCGA-CM-6166-01
COADREAD(T1=10,T2=57,T3=259,T4=50)	T2	3.8451	TCGA-G4-6321-01
COADREAD(T1=10,T2=57,T3=259,T4=50)	T3	4.0171	TCGA-EI-6513-01
COADREAD(T1=10,T2=57,T3=259,T4=50)	T3	3.8095	TCGA-D5-6539-01
COADREAD(T1=10,T2=57,T3=259,T4=50)	T3	4.6136	TCGA-CM-5344-01
COADREAD(T1=10,T2=57,T3=259,T4=50)	T3	1.31089	TCGA-A6-2674-01
COADREAD(T1=10,T2=57,T3=259,T4=50)	T4	2.9013	TCGA-AF-4110-01
COADREAD(T1=10,T2=57,T3=259,T4=50)	T3	3.2587	TCGA-D5-6536-01
COADREAD(T1=10,T2=57,T3=259,T4=50)	T3	3.8126	TCGA-A6-6140-01
COADREAD(T1=10,T2=57,T3=259,T4=50)	T4	3.7182	TCGA-A6-A566-01
COADREAD(T1=10,T2=57,T3=259,T4=50)	T3	3.7028	TCGA-A6-6141-01
COADREAD(T1=10,T2=57,T3=259,T4=50)	T3	4.1269	TCGA-D5-5541-01
COADREAD(T1=10,T2=57,T3=259,T4=50)	T3	3.2405	TCGA-EI-6506-01
COADREAD(T1=10,T2=57,T3=259,T4=50)	T3	2.5163	TCGA-AM-5821-01
COADREAD(T1=10,T2=57,T3=259,T4=50)	T3	3.2826	TCGA-AD-6901-01
COADREAD(T1=10,T2=57,T3=259,T4=50)	T2	3.1458	TCGA-CM-6161-01
COADREAD(T1=10,T2=57,T3=259,T4=50)	T3	3.4933	TCGA-AH-6547-01
COADREAD(T1=10,T2=57,T3=259,T4=50)	T3	2.4753	TCGA-CK-6748-01
COADREAD(T1=10,T2=57,T3=259,T4=50)	T2	2.6602	TCGA-D5-6540-01
COADREAD(T1=10,T2=57,T3=259,T4=50)	T4	3.5337	TCGA-F5-6813-01
COADREAD(T1=10,T2=57,T3=259,T4=50)	T3	3.3336	TCGA-AZ-4684-01
COADREAD(T1=10,T2=57,T3=259,T4=50)	T4	4.1844	TCGA-5M-AAT6-01
COADREAD(T1=10,T2=57,T3=259,T4=50)	T3	3.6474	TCGA-G4-6302-01
COADREAD(T1=10,T2=57,T3=259,T4=50)	T3	4.3177	TCGA-DC-6683-01
COADREAD(T1=10,T2=57,T3=259,T4=50)	T3	3.5124	TCGA-G4-6310-01
COADREAD(T1=10,T2=57,T3=259,T4=50)	T4	4.7165	TCGA-NH-A6GA-01
COADREAD(T1=10,T2=57,T3=259,T4=50)	T3	4.1335	TCGA-AA-3655-01
COADREAD(T1=10,T2=57,T3=259,T4=50)	T3	3.9947	TCGA-A6-6652-01
COADREAD(T1=10,T2=57,T3=259,T4=50)	T3	3.9356	TCGA-CM-5863-01
COADREAD(T1=10,T2=57,T3=259,T4=50)	T2	2.1411	TCGA-DC-6155-01
COADREAD(T1=10,T2=57,T3=259,T4=50)	T3	3.0323	TCGA-BM-6198-01
COADREAD(T1=10,T2=57,T3=259,T4=50)	T4	3.5009	TCGA-CM-6678-01
COADREAD(T1=10,T2=57,T3=259,T4=50)	T3	4.4784	TCGA-DY-A1DG-01
COADREAD(T1=10,T2=57,T3=259,T4=50)	T3	3.8935	TCGA-D5-6529-01
COADREAD(T1=10,T2=57,T3=259,T4=50)	T3	4.0171	TCGA-T9-A92H-01
COADREAD(T1=10,T2=57,T3=259,T4=50)	T3	4.4384	TCGA-A6-5657-01
COADREAD(T1=10,T2=57,T3=259,T4=50)	T3	2.5263	TCGA-D5-6930-01
COADREAD(T1=10,T2=57,T3=259,T4=50)	T3	4.0278	TCGA-DT-5265-01
COADREAD(T1=10,T2=57,T3=259,T4=50)	T2	2.8897	TCGA-QL-A97D-01
COADREAD(T1=10,T2=57,T3=259,T4=50)	T2	3.7094	TCGA-D5-7000-01
COADREAD(T1=10,T2=57,T3=259,T4=50)	T3	3.5523	TCGA-D5-5537-01
COADREAD(T1=10,T2=57,T3=259,T4=50)	T3	3.034	TCGA-CM-5860-01
COADREAD(T1=10,T2=57,T3=259,T4=50)	T3	3.9783	TCGA-AA-A01P-01
COADREAD(T1=10,T2=57,T3=259,T4=50)	T3	3.6612	TCGA-CK-4950-01
COADREAD(T1=10,T2=57,T3=259,T4=50)	T4	1.2696	TCGA-SS-A7HO-01
COADREAD(T1=10,T2=57,T3=259,T4=50)	T3	4.2676	TCGA-D5-6537-01
COADREAD(T1=10,T2=57,T3=259,T4=50)	T3	3.9892	TCGA-CA-5254-01
COADREAD(T1=10,T2=57,T3=259,T4=50)	T2	3.0774	TCGA-AD-A5EK-01
COADREAD(T1=10,T2=57,T3=259,T4=50)	T3	3.9393	TCGA-G5-6235-01
COADREAD(T1=10,T2=57,T3=259,T4=50)	T4	3.1212	TCGA-CK-6746-01
COADREAD(T1=10,T2=57,T3=259,T4=50)	T3	3.506	TCGA-CA-6718-01
COADREAD(T1=10,T2=57,T3=259,T4=50)	T3	3.245	TCGA-AY-5543-01
COADREAD(T1=10,T2=57,T3=259,T4=50)	T3	3.2722	TCGA-F4-6807-01
COADREAD(T1=10,T2=57,T3=259,T4=50)	T2	3.728	TCGA-CK-5915-01
COADREAD(T1=10,T2=57,T3=259,T4=50)	T3	1.84842	TCGA-A6-3810-01
COADREAD(T1=10,T2=57,T3=259,T4=50)	T4	2.484	TCGA-A6-6781-01
COADREAD(T1=10,T2=57,T3=259,T4=50)	T4	4.1111	TCGA-NH-A50U-01
COADREAD(T1=10,T2=57,T3=259,T4=50)	T3	4.5318	TCGA-AU-3779-01
COADREAD(T1=10,T2=57,T3=259,T4=50)	T3	3.8391	TCGA-DM-A1D4-01
COADREAD(T1=10,T2=57,T3=259,T4=50)	T4	3.3814	TCGA-G4-6304-01
COADREAD(T1=10,T2=57,T3=259,T4=50)	T2	3.9468	TCGA-AF-2693-01
COADREAD(T1=10,T2=57,T3=259,T4=50)	T3	4.1724	TCGA-CA-6717-01
COADREAD(T1=10,T2=57,T3=259,T4=50)	T3	4.5429	TCGA-DM-A1D0-01
COADREAD(T1=10,T2=57,T3=259,T4=50)	T3	4.4523	TCGA-CM-6675-01
COADREAD(T1=10,T2=57,T3=259,T4=50)	T3	2.945	TCGA-DC-4745-01
COADREAD(T1=10,T2=57,T3=259,T4=50)	T3	3.3119	TCGA-AF-A56K-01
COADREAD(T1=10,T2=57,T3=259,T4=50)	T2	3.7248	TCGA-DC-4749-01
COADREAD(T1=10,T2=57,T3=259,T4=50)	T3	3.1924	TCGA-F5-6571-01
COADREAD(T1=10,T2=57,T3=259,T4=50)	T1	3.1311	TCGA-AZ-4313-01
COADREAD(T1=10,T2=57,T3=259,T4=50)	T3	3.8571	TCGA-G4-6307-01
COADREAD(T1=10,T2=57,T3=259,T4=50)	T3	3.2752	TCGA-AZ-5403-01
COADREAD(T1=10,T2=57,T3=259,T4=50)	T3	3.7083	TCGA-CM-5861-01
COADREAD(T1=10,T2=57,T3=259,T4=50)	T3	3.8915	TCGA-CA-5796-01
COADREAD(T1=10,T2=57,T3=259,T4=50)	T4	3.1653	TCGA-AZ-4323-01
COADREAD(T1=10,T2=57,T3=259,T4=50)	T3	3.7302	TCGA-D5-6928-01
COADREAD(T1=10,T2=57,T3=259,T4=50)	T3	2.874	TCGA-AA-3685-01
COADREAD(T1=10,T2=57,T3=259,T4=50)	T1	2.8482	TCGA-CI-6623-01
COADREAD(T1=10,T2=57,T3=259,T4=50)	T3	3.9232	TCGA-AF-2690-01
COADREAD(T1=10,T2=57,T3=259,T4=50)	T4	3.4817	TCGA-A6-5664-01
COADREAD(T1=10,T2=57,T3=259,T4=50)	T1	3.9552	TCGA-AZ-5407-01
COADREAD(T1=10,T2=57,T3=259,T4=50)	T3	4.0739	TCGA-AY-6196-01
COADREAD(T1=10,T2=57,T3=259,T4=50)	T3	3.2143	TCGA-D5-6920-01
COADREAD(T1=10,T2=57,T3=259,T4=50)	T3	3.7656	TCGA-G4-6297-01
COADREAD(T1=10,T2=57,T3=259,T4=50)	T3	3.6578	TCGA-A6-2686-01
COADREAD(T1=10,T2=57,T3=259,T4=50)	T3	4.0019	TCGA-DM-A28F-01
COADREAD(T1=10,T2=57,T3=259,T4=50)	T3	2.1313	TCGA-CA-5256-01
COADREAD(T1=10,T2=57,T3=259,T4=50)	T4	3.6543	TCGA-A6-2682-01
COADREAD(T1=10,T2=57,T3=259,T4=50)	T2	3.5572	TCGA-AZ-6608-01
COADREAD(T1=10,T2=57,T3=259,T4=50)	T3	3.1458	TCGA-AG-3591-01
COADREAD(T1=10,T2=57,T3=259,T4=50)	T3	3.4318	TCGA-AG-4022-01
COADREAD(T1=10,T2=57,T3=259,T4=50)	T3	3.4411	TCGA-CI-6621-01
COADREAD(T1=10,T2=57,T3=259,T4=50)	T2	3.7226	TCGA-G4-6306-01
COADREAD(T1=10,T2=57,T3=259,T4=50)	T3	4.0884	TCGA-AG-3731-01
COADREAD(T1=10,T2=57,T3=259,T4=50)	T3	1.8996	TCGA-DY-A1DF-01
COADREAD(T1=10,T2=57,T3=259,T4=50)	T3	4.4938	TCGA-D5-6922-01
COADREAD(T1=10,T2=57,T3=259,T4=50)	T3	3.287	TCGA-EI-6917-01
COADREAD(T1=10,T2=57,T3=259,T4=50)	T1	2.9948	TCGA-CK-5916-01
COADREAD(T1=10,T2=57,T3=259,T4=50)	T3	3.7815	TCGA-DM-A288-01
COADREAD(T1=10,T2=57,T3=259,T4=50)	T3	3.9774	TCGA-DY-A1DE-01
COADREAD(T1=10,T2=57,T3=259,T4=50)	T3	4.0251	TCGA-AH-6644-01
COADREAD(T1=10,T2=57,T3=259,T4=50)	T3	3.7464	TCGA-F5-6465-01
COADREAD(T1=10,T2=57,T3=259,T4=50)	T3	2.3871	TCGA-DM-A1HB-01
COADREAD(T1=10,T2=57,T3=259,T4=50)	T2	3.74	TCGA-CM-6170-01
COADREAD(T1=10,T2=57,T3=259,T4=50)	T2	2.7615	TCGA-AF-6655-01
COADREAD(T1=10,T2=57,T3=259,T4=50)	T3	3.7291	TCGA-F5-6861-01
COADREAD(T1=10,T2=57,T3=259,T4=50)	T3	4.3009	TCGA-F5-6814-01
COADREAD(T1=10,T2=57,T3=259,T4=50)	T3	3.8521	TCGA-EI-6511-01
COADREAD(T1=10,T2=57,T3=259,T4=50)	T3	4.63	TCGA-CK-4948-01
COADREAD(T1=10,T2=57,T3=259,T4=50)	T4	3.1813	TCGA-AA-3662-01
COADREAD(T1=10,T2=57,T3=259,T4=50)	T3	4.0251	TCGA-CM-6165-01
COADREAD(T1=10,T2=57,T3=259,T4=50)	T2	3.3293	TCGA-F4-6856-01
COADREAD(T1=10,T2=57,T3=259,T4=50)	T2	3.8411	TCGA-F4-6569-01
COADREAD(T1=10,T2=57,T3=259,T4=50)	T3	3.7857	TCGA-EI-6514-01
COADREAD(T1=10,T2=57,T3=259,T4=50)	T3	4.5053	TCGA-D5-6535-01
COADREAD(T1=10,T2=57,T3=259,T4=50)	T2	3.1491	TCGA-AA-3526-01
COADREAD(T1=10,T2=57,T3=259,T4=50)	T3	3.7269	TCGA-AD-6895-01
COADREAD(T1=10,T2=57,T3=259,T4=50)	T3	3.4765	TCGA-AH-6544-01
COADREAD(T1=10,T2=57,T3=259,T4=50)	T4	3.2236	TCGA-NH-A8F8-01
COADREAD(T1=10,T2=57,T3=259,T4=50)	T4	3.3321	TCGA-AF-6672-01
COADREAD(T1=10,T2=57,T3=259,T4=50)	T3	3.8259	TCGA-D5-6929-01
COADREAD(T1=10,T2=57,T3=259,T4=50)	T3	3.4958	TCGA-DY-A0XA-01
COADREAD(T1=10,T2=57,T3=259,T4=50)	T3	4.0952	TCGA-A6-5667-01
COADREAD(T1=10,T2=57,T3=259,T4=50)	T3	4.1327	TCGA-EI-7002-01
COADREAD(T1=10,T2=57,T3=259,T4=50)	T3	3.4945	TCGA-CM-6169-01
COADREAD(T1=10,T2=57,T3=259,T4=50)	T3	3.7226	TCGA-CM-6680-01
COADREAD(T1=10,T2=57,T3=259,T4=50)	T3	2.7826	TCGA-AA-3663-01
COADREAD(T1=10,T2=57,T3=259,T4=50)	T3	4.3562	TCGA-A6-6648-01
COADREAD(T1=10,T2=57,T3=259,T4=50)	T3	3.8471	TCGA-EI-6885-01
COADREAD(T1=10,T2=57,T3=259,T4=50)	T3	2.9747	TCGA-RU-A8FL-01
COADREAD(T1=10,T2=57,T3=259,T4=50)	T2	1.8957	TCGA-DY-A1H8-01
COADREAD(T1=10,T2=57,T3=259,T4=50)	T3	4.1111	TCGA-CA-6719-01
COADREAD(T1=10,T2=57,T3=259,T4=50)	T3	3.7421	TCGA-A6-6649-01
COADREAD(T1=10,T2=57,T3=259,T4=50)	T3	2.8622	TCGA-NH-A6GB-01
COADREAD(T1=10,T2=57,T3=259,T4=50)	T4	3.7898	TCGA-AZ-4614-01
COADREAD(T1=10,T2=57,T3=259,T4=50)	T4	0.619183	TCGA-A6-3809-01
COADREAD(T1=10,T2=57,T3=259,T4=50)	T2	2.1894	TCGA-CM-5864-01
COADREAD(T1=10,T2=57,T3=259,T4=50)	T3	3.2988	TCGA-D5-6927-01
COADREAD(T1=10,T2=57,T3=259,T4=50)	T3	3.3032	TCGA-QG-A5YW-01
COADREAD(T1=10,T2=57,T3=259,T4=50)	T2	3.9393	TCGA-AA-A01X-01
COADREAD(T1=10,T2=57,T3=259,T4=50)	T3	3.38	TCGA-D5-6538-01
COADREAD(T1=10,T2=57,T3=259,T4=50)	T3	4.499	TCGA-F5-6864-01
COADREAD(T1=10,T2=57,T3=259,T4=50)	T3	3.9204	TCGA-AG-3725-01
COADREAD(T1=10,T2=57,T3=259,T4=50)	T3	4.0366	TCGA-CM-6172-01
COADREAD(T1=10,T2=57,T3=259,T4=50)	T4	4.0584	TCGA-D5-6533-01
COADREAD(T1=10,T2=57,T3=259,T4=50)	T3	3.6759	TCGA-DM-A28H-01
COADREAD(T1=10,T2=57,T3=259,T4=50)	T3	3.0252	TCGA-F4-6460-01
COADREAD(T1=10,T2=57,T3=259,T4=50)	T2	3.4183	TCGA-AH-6897-01
COADREAD(T1=10,T2=57,T3=259,T4=50)	T3	2.3135	TCGA-D5-5540-01
COADREAD(T1=10,T2=57,T3=259,T4=50)	T3	1.24852	TCGA-A6-2672-01
COADREAD(T1=10,T2=57,T3=259,T4=50)	T3	3.8561	TCGA-F4-6463-01
COADREAD(T1=10,T2=57,T3=259,T4=50)	T3	3.4635	TCGA-F5-6812-01
COADREAD(T1=10,T2=57,T3=259,T4=50)	T4	4.2312	TCGA-AZ-6600-01
COADREAD(T1=10,T2=57,T3=259,T4=50)	T2	4.1244	TCGA-DC-6160-01
COADREAD(T1=10,T2=57,T3=259,T4=50)	T2	3.5621	TCGA-D5-6530-01
COADREAD(T1=10,T2=57,T3=259,T4=50)	T3	4.1547	TCGA-G4-6303-01
COADREAD(T1=10,T2=57,T3=259,T4=50)	T2	3.6928	TCGA-D5-6923-01
COADREAD(T1=10,T2=57,T3=259,T4=50)	T3	3.0893	TCGA-AZ-4682-01
COADREAD(T1=10,T2=57,T3=259,T4=50)	T3	3.1442	TCGA-CL-4957-01
COADREAD(T1=10,T2=57,T3=259,T4=50)	T3	3.4424	TCGA-G4-6586-01
COADREAD(T1=10,T2=57,T3=259,T4=50)	T4	3.5608	TCGA-EI-7004-01
COADREAD(T1=10,T2=57,T3=259,T4=50)	T1	4.1708	TCGA-AD-6890-01
COADREAD(T1=10,T2=57,T3=259,T4=50)	T3	2.2603	TCGA-AD-6889-01
COADREAD(T1=10,T2=57,T3=259,T4=50)	T3	2.8199	TCGA-DM-A28K-01
COADREAD(T1=10,T2=57,T3=259,T4=50)	T4	4.0488	TCGA-DC-6154-01
COADREAD(T1=10,T2=57,T3=259,T4=50)	T2	3.6589	TCGA-QG-A5Z2-01
COADREAD(T1=10,T2=57,T3=259,T4=50)	T3	3.7171	TCGA-G4-6294-01
COADREAD(T1=10,T2=57,T3=259,T4=50)	T3	3.421	TCGA-QG-A5Z1-01
COADREAD(T1=10,T2=57,T3=259,T4=50)	T2	4.2103	TCGA-G4-6628-01
COADREAD(T1=10,T2=57,T3=259,T4=50)	T2	3.7182	TCGA-CI-6624-01
COADREAD(T1=10,T2=57,T3=259,T4=50)	T3	4.1474	TCGA-D5-6534-01
COADREAD(T1=10,T2=57,T3=259,T4=50)	T2	1.7786	TCGA-AF-5654-01
COADREAD(T1=10,T2=57,T3=259,T4=50)	T3	4.3527	TCGA-DM-A1DB-01
COADREAD(T1=10,T2=57,T3=259,T4=50)	T2	2.68052	TCGA-A6-5659-01
COADREAD(T1=10,T2=57,T3=259,T4=50)	T3	3.7017	TCGA-A6-5660-01
COADREAD(T1=10,T2=57,T3=259,T4=50)	T3	2.3871	TCGA-CM-5862-01
COADREAD(T1=10,T2=57,T3=259,T4=50)	T3	3.7237	TCGA-F4-6805-01
COADREAD(T1=10,T2=57,T3=259,T4=50)	T3	4.1571	TCGA-CK-4951-01
COADREAD(T1=10,T2=57,T3=259,T4=50)	T3	3.7496	TCGA-F4-6704-01
COADREAD(T1=10,T2=57,T3=259,T4=50)	T2	3.5935	TCGA-CK-6751-01
COADREAD(T1=10,T2=57,T3=259,T4=50)	T3	2.6418	TCGA-AD-A5EJ-01
COADREAD(T1=10,T2=57,T3=259,T4=50)	T3	2.872	TCGA-CA-6716-01
COADREAD(T1=10,T2=57,T3=259,T4=50)	T3	3.5399	TCGA-AA-A01Z-01
COADREAD(T1=10,T2=57,T3=259,T4=50)	T2	3.8157	TCGA-F4-6806-01
COADREAD(T1=10,T2=57,T3=259,T4=50)	T3	3.1212	TCGA-D5-6531-01
COADREAD(T1=10,T2=57,T3=259,T4=50)	T3	3.4237	TCGA-DM-A1D9-01
COADREAD(T1=10,T2=57,T3=259,T4=50)	T3	3.4451	TCGA-DM-A0XF-01
COADREAD(T1=10,T2=57,T3=259,T4=50)	T2	3.6347	TCGA-AZ-6603-01
COADREAD(T1=10,T2=57,T3=259,T4=50)	T3	3.6905	TCGA-A6-A5ZU-01
COADREAD(T1=10,T2=57,T3=259,T4=50)	T3	3.5312	TCGA-NH-A5IV-01
COADREAD(T1=10,T2=57,T3=259,T4=50)	T3	3.5399	TCGA-A6-6651-01
COADREAD(T1=10,T2=57,T3=259,T4=50)	T3	2.9929	TCGA-CA-6715-01
COADREAD(T1=10,T2=57,T3=259,T4=50)	T3	3.3379	TCGA-CL-5917-01
COADREAD(T1=10,T2=57,T3=259,T4=50)	T3	3.3731	TCGA-CM-6674-01
COADREAD(T1=10,T2=57,T3=259,T4=50)	T3	2.4544	TCGA-D5-6932-01
COADREAD(T1=10,T2=57,T3=259,T4=50)	T3	4.4437	TCGA-A6-6137-01
COADREAD(T1=10,T2=57,T3=259,T4=50)	T3	4.2929	TCGA-DM-A28M-01
COADREAD(T1=10,T2=57,T3=259,T4=50)	T3	3.2205	TCGA-CL-5918-01
COADREAD(T1=10,T2=57,T3=259,T4=50)	T3	3.2096	TCGA-EF-5831-01
COADREAD(T1=10,T2=57,T3=259,T4=50)	T3	3.5935	TCGA-F4-6459-01
COADREAD(T1=10,T2=57,T3=259,T4=50)	T2	2.03244	TCGA-A6-2684-01
COADREAD(T1=10,T2=57,T3=259,T4=50)	T3	3.13329	TCGA-A6-6780-01
COADREAD(T1=10,T2=57,T3=259,T4=50)	T4	4.2281	TCGA-AZ-6607-01
COADREAD(T1=10,T2=57,T3=259,T4=50)	T3	2.6232	TCGA-G4-6322-01
COADREAD(T1=10,T2=57,T3=259,T4=50)	T3	2.7444	TCGA-DC-5869-01
COADREAD(T1=10,T2=57,T3=259,T4=50)	T3	2.9839	TCGA-A6-A565-01
COADREAD(T1=10,T2=57,T3=259,T4=50)	T3	3.0637	TCGA-A6-A56B-01
COADREAD(T1=10,T2=57,T3=259,T4=50)	T2	3.0428	TCGA-AY-A54L-01
COADREAD(T1=10,T2=57,T3=259,T4=50)	T2	4.0037	TCGA-AA-3495-01
COADREAD(T1=10,T2=57,T3=259,T4=50)	T3	2.28617	TCGA-A6-5665-01
COADREAD(T1=10,T2=57,T3=259,T4=50)	T3	1.72512	TCGA-A6-2677-01
COADREAD(T1=10,T2=57,T3=259,T4=50)	T3	3.6172	TCGA-CM-6162-01
COADREAD(T1=10,T2=57,T3=259,T4=50)	T3	2.9948	TCGA-AF-A56N-01
COADREAD(T1=10,T2=57,T3=259,T4=50)	T3	3.928	TCGA-AD-6963-01
COADREAD(T1=10,T2=57,T3=259,T4=50)	T3	3.2297	TCGA-AY-6197-01
COADREAD(T1=10,T2=57,T3=259,T4=50)	T3	3.831	TCGA-D5-6541-01
COADREAD(T1=10,T2=57,T3=259,T4=50)	T3	4.1061	TCGA-CM-5348-01
COADREAD(T1=10,T2=57,T3=259,T4=50)	T3	3.4713	TCGA-4T-AA8H-01
COADREAD(T1=10,T2=57,T3=259,T4=50)	T3	3.8739	TCGA-DM-A28G-01
COADREAD(T1=10,T2=57,T3=259,T4=50)	T3	3.0944	TCGA-5M-AATE-01
COADREAD(T1=10,T2=57,T3=259,T4=50)	T3	3.6066	TCGA-DM-A28C-01
COADREAD(T1=10,T2=57,T3=259,T4=50)	T2	3.8905	TCGA-AG-3732-01
COADREAD(T1=10,T2=57,T3=259,T4=50)	T3	2.3704	TCGA-EI-6509-01
COADREAD(T1=10,T2=57,T3=259,T4=50)	T3	3.4843	TCGA-DM-A0XD-01
COADREAD(T1=10,T2=57,T3=259,T4=50)	T3	3.1162	TCGA-CI-6620-01
COADREAD(T1=10,T2=57,T3=259,T4=50)	T3	3.2389	TCGA-AH-6643-01
COADREAD(T1=10,T2=57,T3=259,T4=50)	T3	3.755	TCGA-DM-A282-01
COADREAD(T1=10,T2=57,T3=259,T4=50)	T3	3.1781	TCGA-DY-A1DC-01
COADREAD(T1=10,T2=57,T3=259,T4=50)	T2	3.1908	TCGA-CM-4744-01
COADREAD(T1=10,T2=57,T3=259,T4=50)	T4	3.7127	TCGA-AZ-6605-01
COADREAD(T1=10,T2=57,T3=259,T4=50)	T3	3.1129	TCGA-EI-6881-01
COADREAD(T1=10,T2=57,T3=259,T4=50)	T3	4.0144	TCGA-AZ-6601-01
COADREAD(T1=10,T2=57,T3=259,T4=50)	T4	3.8778	TCGA-F5-6464-01
COADREAD(T1=10,T2=57,T3=259,T4=50)	T2	3.9261	TCGA-AY-A71X-01
COADREAD(T1=10,T2=57,T3=259,T4=50)	T3	4.5958	TCGA-F5-6811-01
COADREAD(T1=10,T2=57,T3=259,T4=50)	T3	3.2034	TCGA-AA-3675-01
COADREAD(T1=10,T2=57,T3=259,T4=50)	T4	3.3689	TCGA-A6-6782-01
COADREAD(T1=10,T2=57,T3=259,T4=50)	T3	3.838	TCGA-CM-4751-01
BRCA(T1=280,T2=630,T3=138,T4=40)	T3	3.9308	TCGA-C8-A1HL-01
BRCA(T1=280,T2=630,T3=138,T4=40)	T2	4.1186	TCGA-EW-A2FS-01
BRCA(T1=280,T2=630,T3=138,T4=40)	T2	4.3148	TCGA-A2-A3XX-01
BRCA(T1=280,T2=630,T3=138,T4=40)	T3	4.3611	TCGA-Z7-A8R5-01
BRCA(T1=280,T2=630,T3=138,T4=40)	T2	4.7887	TCGA-B6-A0RL-01
BRCA(T1=280,T2=630,T3=138,T4=40)	T2	4.447	TCGA-E2-A2P6-01
BRCA(T1=280,T2=630,T3=138,T4=40)	T1	5.0131	TCGA-AO-A1KT-01
BRCA(T1=280,T2=630,T3=138,T4=40)	T2	4.048	TCGA-E9-A3HO-01
BRCA(T1=280,T2=630,T3=138,T4=40)	T3	4.2041	TCGA-D8-A1XJ-01
BRCA(T1=280,T2=630,T3=138,T4=40)	T2	4.5085	TCGA-AC-A2FK-01
BRCA(T1=280,T2=630,T3=138,T4=40)	T1	4.7203	TCGA-E9-A1R4-01
BRCA(T1=280,T2=630,T3=138,T4=40)	T1	4.7016	TCGA-LL-A740-01
BRCA(T1=280,T2=630,T3=138,T4=40)	T3	4.3428	TCGA-BH-A0BZ-01
BRCA(T1=280,T2=630,T3=138,T4=40)	T1	4.9383	TCGA-C8-A3M8-01
BRCA(T1=280,T2=630,T3=138,T4=40)	T2	4.5199	TCGA-BH-A0BM-01
BRCA(T1=280,T2=630,T3=138,T4=40)	T2	4.3428	TCGA-AN-A0XW-01
BRCA(T1=280,T2=630,T3=138,T4=40)	T3	3.2158	TCGA-E2-A1LL-01
BRCA(T1=280,T2=630,T3=138,T4=40)	T1	4.6999	TCGA-BH-A18K-01
BRCA(T1=280,T2=630,T3=138,T4=40)	T3	4.4196	TCGA-BH-A28O-01
BRCA(T1=280,T2=630,T3=138,T4=40)	T3	4.9189	TCGA-A7-A4SC-01
BRCA(T1=280,T2=630,T3=138,T4=40)	T1	4.843	TCGA-E9-A24A-01
BRCA(T1=280,T2=630,T3=138,T4=40)	T2	4.9887	TCGA-AC-A6IV-01
BRCA(T1=280,T2=630,T3=138,T4=40)	T2	3.5224	TCGA-B6-A400-01
BRCA(T1=280,T2=630,T3=138,T4=40)	T2	4.5596	TCGA-A8-A096-01
BRCA(T1=280,T2=630,T3=138,T4=40)	T1	3.055	TCGA-E2-A1LH-01
BRCA(T1=280,T2=630,T3=138,T4=40)	T2	4.3986	TCGA-B6-A0RH-01
BRCA(T1=280,T2=630,T3=138,T4=40)	T2	4.0401	TCGA-A8-A07W-01
BRCA(T1=280,T2=630,T3=138,T4=40)	T1	4.6195	TCGA-B6-A0X7-01
BRCA(T1=280,T2=630,T3=138,T4=40)	T2	5.0683	TCGA-EW-A1P0-01
BRCA(T1=280,T2=630,T3=138,T4=40)	T3	3.6793	TCGA-EW-A1PC-01
BRCA(T1=280,T2=630,T3=138,T4=40)	T2	4.5021	TCGA-A7-A0CH-01
BRCA(T1=280,T2=630,T3=138,T4=40)	T2	4.8924	TCGA-E9-A2JS-01
BRCA(T1=280,T2=630,T3=138,T4=40)	T2	4.8605	TCGA-A2-A1G6-01
BRCA(T1=280,T2=630,T3=138,T4=40)	T2	4.1161	TCGA-B6-A0WV-01
BRCA(T1=280,T2=630,T3=138,T4=40)	T2	3.8451	TCGA-UL-AAZ6-01
BRCA(T1=280,T2=630,T3=138,T4=40)	T3	4.691	TCGA-B6-A0RG-01
BRCA(T1=280,T2=630,T3=138,T4=40)	T1	3.79554	TCGA-A7-A0DC-01
BRCA(T1=280,T2=630,T3=138,T4=40)	T3	3.7867	TCGA-A2-A0CR-01
BRCA(T1=280,T2=630,T3=138,T4=40)	T1	4.5832	TCGA-GM-A2DD-01
BRCA(T1=280,T2=630,T3=138,T4=40)	T2	4.0064	TCGA-BH-A6R9-01
BRCA(T1=280,T2=630,T3=138,T4=40)	T2	4.5485	TCGA-HN-A2OB-01
BRCA(T1=280,T2=630,T3=138,T4=40)	T4	3.9137	TCGA-UU-A93S-01
BRCA(T1=280,T2=630,T3=138,T4=40)	T1	5.2939	TCGA-AR-A24P-01
BRCA(T1=280,T2=630,T3=138,T4=40)	T2	5.0237	TCGA-E9-A1N9-01
BRCA(T1=280,T2=630,T3=138,T4=40)	T3	4.2571	TCGA-B6-A0I9-01
BRCA(T1=280,T2=630,T3=138,T4=40)	T1	4.964	TCGA-E2-A1L9-01
BRCA(T1=280,T2=630,T3=138,T4=40)	T2	4.677	TCGA-AC-A23H-01
BRCA(T1=280,T2=630,T3=138,T4=40)	T1	4.245	TCGA-AR-A1AP-01
BRCA(T1=280,T2=630,T3=138,T4=40)	T1	4.2181	TCGA-BH-A0H5-01
BRCA(T1=280,T2=630,T3=138,T4=40)	T2	4.3931	TCGA-OK-A5Q2-01
BRCA(T1=280,T2=630,T3=138,T4=40)	T1	4.1036	TCGA-BH-A0E6-01
BRCA(T1=280,T2=630,T3=138,T4=40)	T4	4.5091	TCGA-D8-A1JA-01
BRCA(T1=280,T2=630,T3=138,T4=40)	T1	4.8595	TCGA-BH-A0BW-01
BRCA(T1=280,T2=630,T3=138,T4=40)	T2	3.5547	TCGA-B6-A0WZ-01
BRCA(T1=280,T2=630,T3=138,T4=40)	T2	3.6972	TCGA-C8-A135-01
BRCA(T1=280,T2=630,T3=138,T4=40)	T2	3.6101	TCGA-BH-A0E2-01
BRCA(T1=280,T2=630,T3=138,T4=40)	T2	4.7882	TCGA-BH-A0BJ-01
BRCA(T1=280,T2=630,T3=138,T4=40)	T2	3.755	TCGA-BH-A203-01
BRCA(T1=280,T2=630,T3=138,T4=40)	T2	3.3759	TCGA-A2-A1G1-01
BRCA(T1=280,T2=630,T3=138,T4=40)	T2	5.2258	TCGA-BH-A0C7-01
BRCA(T1=280,T2=630,T3=138,T4=40)	T2	3.0163	TCGA-E2-A14X-01
BRCA(T1=280,T2=630,T3=138,T4=40)	T1	4.0348	TCGA-BH-A8FZ-01
BRCA(T1=280,T2=630,T3=138,T4=40)	T2	4.0884	TCGA-S3-AA17-01
BRCA(T1=280,T2=630,T3=138,T4=40)	T1	4.5002	TCGA-AR-A1AR-01
BRCA(T1=280,T2=630,T3=138,T4=40)	T2	4.0935	TCGA-D8-A13Z-01
BRCA(T1=280,T2=630,T3=138,T4=40)	T2	3.7877	TCGA-A7-A6VX-01
BRCA(T1=280,T2=630,T3=138,T4=40)	T1	4.8228	TCGA-AR-A255-01
BRCA(T1=280,T2=630,T3=138,T4=40)	T2	4.7955	TCGA-AR-A1AT-01
BRCA(T1=280,T2=630,T3=138,T4=40)	T2	5.0343	TCGA-A2-A0CU-01
BRCA(T1=280,T2=630,T3=138,T4=40)	T3	4.6416	TCGA-BH-A0AZ-01
BRCA(T1=280,T2=630,T3=138,T4=40)	T1	4.5286	TCGA-E2-A1IH-01
BRCA(T1=280,T2=630,T3=138,T4=40)	T2	6.997	TCGA-BH-A18R-01
BRCA(T1=280,T2=630,T3=138,T4=40)	T3	4.5091	TCGA-AC-A4ZE-01
BRCA(T1=280,T2=630,T3=138,T4=40)	T2	4.4457	TCGA-B6-A0RS-01
BRCA(T1=280,T2=630,T3=138,T4=40)	T2	5.2461	TCGA-AR-A24H-01
BRCA(T1=280,T2=630,T3=138,T4=40)	T4	4.7825	TCGA-A8-A099-01
BRCA(T1=280,T2=630,T3=138,T4=40)	T2	4.9978	TCGA-A8-A09R-01
BRCA(T1=280,T2=630,T3=138,T4=40)	T2	3.7741	TCGA-EW-A6SC-01
BRCA(T1=280,T2=630,T3=138,T4=40)	T4	4.5205	TCGA-D8-A1XC-01
BRCA(T1=280,T2=630,T3=138,T4=40)	T1	4.6468	TCGA-EW-A1PE-01
BRCA(T1=280,T2=630,T3=138,T4=40)	T1	4.3499	TCGA-E2-A1II-01
BRCA(T1=280,T2=630,T3=138,T4=40)	T1	4.3263	TCGA-S3-AA14-01
BRCA(T1=280,T2=630,T3=138,T4=40)	T4	4.7442	TCGA-A8-A09B-01
BRCA(T1=280,T2=630,T3=138,T4=40)	T2	4.7159	TCGA-AR-A5QP-01
BRCA(T1=280,T2=630,T3=138,T4=40)	T3	4.3184	TCGA-E9-A6HE-01
BRCA(T1=280,T2=630,T3=138,T4=40)	T1	4.5224	TCGA-BH-A0HI-01
BRCA(T1=280,T2=630,T3=138,T4=40)	T2	3.6646	TCGA-EW-A1P1-01
BRCA(T1=280,T2=630,T3=138,T4=40)	T2	3.4661	TCGA-OL-A66P-01
BRCA(T1=280,T2=630,T3=138,T4=40)	T3	4.1732	TCGA-A2-A1G4-01
BRCA(T1=280,T2=630,T3=138,T4=40)	T2	4.9031	TCGA-E2-A105-01
BRCA(T1=280,T2=630,T3=138,T4=40)	T1	3.5136	TCGA-E2-A573-01
BRCA(T1=280,T2=630,T3=138,T4=40)	T1	4.9996	TCGA-A2-A0EV-01
BRCA(T1=280,T2=630,T3=138,T4=40)	T1	4.6071	TCGA-A8-A08A-01
BRCA(T1=280,T2=630,T3=138,T4=40)	T1	4.3869	TCGA-E9-A1RG-01
BRCA(T1=280,T2=630,T3=138,T4=40)	T2	4.4945	TCGA-D8-A1XL-01
BRCA(T1=280,T2=630,T3=138,T4=40)	T1	4.215	TCGA-A2-A0ER-01
BRCA(T1=280,T2=630,T3=138,T4=40)	T2	5.4172	TCGA-OL-A66K-01
BRCA(T1=280,T2=630,T3=138,T4=40)	T2	4.5675	TCGA-EW-A1OX-01
BRCA(T1=280,T2=630,T3=138,T4=40)	T2	2.7183	TCGA-S3-AA10-01
BRCA(T1=280,T2=630,T3=138,T4=40)	T2	4.6312	TCGA-A8-A0A9-01
BRCA(T1=280,T2=630,T3=138,T4=40)	T2	4.4719	TCGA-BH-A1FB-01
BRCA(T1=280,T2=630,T3=138,T4=40)	T2	2.5363	TCGA-A2-A04T-01
BRCA(T1=280,T2=630,T3=138,T4=40)	T2	4.6877	TCGA-OL-A5S0-01
BRCA(T1=280,T2=630,T3=138,T4=40)	T2	5.1792	TCGA-A8-A07J-01
BRCA(T1=280,T2=630,T3=138,T4=40)	T1	4.9069	TCGA-E9-A229-01
BRCA(T1=280,T2=630,T3=138,T4=40)	T1	3.9318	TCGA-A2-A0SX-01
BRCA(T1=280,T2=630,T3=138,T4=40)	T1	3.055	TCGA-BH-A0AW-01
BRCA(T1=280,T2=630,T3=138,T4=40)	T2	4.481	TCGA-BH-A2L8-01
BRCA(T1=280,T2=630,T3=138,T4=40)	T1	3.869	TCGA-BH-A0B6-01
BRCA(T1=280,T2=630,T3=138,T4=40)	T2	4.3744	TCGA-AO-A0JL-01
BRCA(T1=280,T2=630,T3=138,T4=40)	T3	4.4115	TCGA-BH-A0BS-01
BRCA(T1=280,T2=630,T3=138,T4=40)	T2	4.7965	TCGA-B6-A0IG-01
BRCA(T1=280,T2=630,T3=138,T4=40)	T1	4.1628	TCGA-OL-A66L-01
BRCA(T1=280,T2=630,T3=138,T4=40)	T1	4.5015	TCGA-BH-A0DO-01
BRCA(T1=280,T2=630,T3=138,T4=40)	T1	3.7518	TCGA-LL-A73Y-01
BRCA(T1=280,T2=630,T3=138,T4=40)	T2	3.6254	TCGA-BH-A0DK-01
BRCA(T1=280,T2=630,T3=138,T4=40)	T1	3.7291	TCGA-BH-A0BG-01
BRCA(T1=280,T2=630,T3=138,T4=40)	T3	4.6543	TCGA-A8-A06Z-01
BRCA(T1=280,T2=630,T3=138,T4=40)	T2	1.105	TCGA-AN-A0AT-01
BRCA(T1=280,T2=630,T3=138,T4=40)	T1	4.5856	TCGA-E2-A14U-01
BRCA(T1=280,T2=630,T3=138,T4=40)	T3	3.3619	TCGA-AR-A24Q-01
BRCA(T1=280,T2=630,T3=138,T4=40)	T2	5.1173	TCGA-EW-A1P5-01
BRCA(T1=280,T2=630,T3=138,T4=40)	T2	4.2134	TCGA-BH-A1FN-01
BRCA(T1=280,T2=630,T3=138,T4=40)	T2	3.6428	TCGA-A7-A4SE-01
BRCA(T1=280,T2=630,T3=138,T4=40)	T3	4.7296	TCGA-A1-A0SJ-01
BRCA(T1=280,T2=630,T3=138,T4=40)	T1	4.6713	TCGA-E2-A570-01
BRCA(T1=280,T2=630,T3=138,T4=40)	T1	4.425	TCGA-BH-A201-01
BRCA(T1=280,T2=630,T3=138,T4=40)	T4	5.0005	TCGA-A8-A09E-01
BRCA(T1=280,T2=630,T3=138,T4=40)	T2	3.9938	TCGA-D8-A27V-01
BRCA(T1=280,T2=630,T3=138,T4=40)	T2	2.2663	TCGA-E2-A14Y-01
BRCA(T1=280,T2=630,T3=138,T4=40)	T2	4.8435	TCGA-MS-A51U-01
BRCA(T1=280,T2=630,T3=138,T4=40)	T2	4.8079	TCGA-A8-A06Y-01
BRCA(T1=280,T2=630,T3=138,T4=40)	T4	4.6764	TCGA-GI-A2C8-01
BRCA(T1=280,T2=630,T3=138,T4=40)	T3	5.0304	TCGA-AR-A1AM-01
BRCA(T1=280,T2=630,T3=138,T4=40)	T2	3.9403	TCGA-AN-A041-01
BRCA(T1=280,T2=630,T3=138,T4=40)	T1	3.9022	TCGA-B6-A409-01
BRCA(T1=280,T2=630,T3=138,T4=40)	T2	4.7077	TCGA-BH-A1EX-01
BRCA(T1=280,T2=630,T3=138,T4=40)	T2	4.1261	TCGA-A7-A0CJ-01
BRCA(T1=280,T2=630,T3=138,T4=40)	T1	4.2661	TCGA-BH-A0H0-01
BRCA(T1=280,T2=630,T3=138,T4=40)	T1	3.6793	TCGA-LL-A5YO-01
BRCA(T1=280,T2=630,T3=138,T4=40)	T2	3.7138	TCGA-AN-A0FW-01
BRCA(T1=280,T2=630,T3=138,T4=40)	T2	4.1343	TCGA-AC-A6IX-01
BRCA(T1=280,T2=630,T3=138,T4=40)	T2	4.7071	TCGA-A2-A04Y-01
BRCA(T1=280,T2=630,T3=138,T4=40)	T1	5.0396	TCGA-E2-A156-01
BRCA(T1=280,T2=630,T3=138,T4=40)	T1	4.6142	TCGA-AR-A24R-01
BRCA(T1=280,T2=630,T3=138,T4=40)	T1	5.0361	TCGA-D8-A1JP-01
BRCA(T1=280,T2=630,T3=138,T4=40)	T1	3.868	TCGA-E2-A1IK-01
BRCA(T1=280,T2=630,T3=138,T4=40)	T1	4.4509	TCGA-AN-A0FS-01
BRCA(T1=280,T2=630,T3=138,T4=40)	T3	4.3716	TCGA-AC-A3TM-01
BRCA(T1=280,T2=630,T3=138,T4=40)	T2	3.6042	TCGA-C8-A12K-01
BRCA(T1=280,T2=630,T3=138,T4=40)	T1	4.0705	TCGA-AR-A2LE-01
BRCA(T1=280,T2=630,T3=138,T4=40)	T2	3.7193	TCGA-BH-A0HK-01
BRCA(T1=280,T2=630,T3=138,T4=40)	T2	4.613	TCGA-AR-A250-01
BRCA(T1=280,T2=630,T3=138,T4=40)	T2	4.8753	TCGA-D8-A1JG-01
BRCA(T1=280,T2=630,T3=138,T4=40)	T2	4.3758	TCGA-C8-A134-01
BRCA(T1=280,T2=630,T3=138,T4=40)	T2	3.4984	TCGA-AN-A0FX-01
BRCA(T1=280,T2=630,T3=138,T4=40)	T2	4.026	TCGA-AC-A62V-01
BRCA(T1=280,T2=630,T3=138,T4=40)	T1	4.2158	TCGA-GM-A3XN-01
BRCA(T1=280,T2=630,T3=138,T4=40)	T1	3.8136	TCGA-C8-A275-01
BRCA(T1=280,T2=630,T3=138,T4=40)	T2	3.2929	TCGA-AO-A129-01
BRCA(T1=280,T2=630,T3=138,T4=40)	T4	5.014	TCGA-BH-A1F8-01
BRCA(T1=280,T2=630,T3=138,T4=40)	T2	3.7971	TCGA-D8-A1JK-01
BRCA(T1=280,T2=630,T3=138,T4=40)	T4	3.002	TCGA-A8-A08X-01
BRCA(T1=280,T2=630,T3=138,T4=40)	T2	4.447	TCGA-AR-A2LN-01
BRCA(T1=280,T2=630,T3=138,T4=40)	T2	4.0109	TCGA-A8-A09A-01
BRCA(T1=280,T2=630,T3=138,T4=40)	T1	4.8069	TCGA-E2-A1IJ-01
BRCA(T1=280,T2=630,T3=138,T4=40)	T2	4.8645	TCGA-A8-A08O-01
BRCA(T1=280,T2=630,T3=138,T4=40)	T3	4.4777	TCGA-A2-A4RY-01
BRCA(T1=280,T2=630,T3=138,T4=40)	T3	4.3938	TCGA-A2-A0SY-01
BRCA(T1=280,T2=630,T3=138,T4=40)	T1	4.1676	TCGA-AC-A8OP-01
BRCA(T1=280,T2=630,T3=138,T4=40)	T2	3.8541	TCGA-EW-A1PA-01
BRCA(T1=280,T2=630,T3=138,T4=40)	T2	4.8675	TCGA-AO-A126-01
BRCA(T1=280,T2=630,T3=138,T4=40)	T2	4.0515	TCGA-AO-A0J6-01
BRCA(T1=280,T2=630,T3=138,T4=40)	T2	1.6785	TCGA-EW-A6SB-01
BRCA(T1=280,T2=630,T3=138,T4=40)	T3	4.251	TCGA-EW-A2FV-01
BRCA(T1=280,T2=630,T3=138,T4=40)	T2	3.5839	TCGA-AO-A03R-01
BRCA(T1=280,T2=630,T3=138,T4=40)	T1	4.4277	TCGA-E9-A54X-01
BRCA(T1=280,T2=630,T3=138,T4=40)	T3	2.6395	TCGA-AO-A0JB-01
BRCA(T1=280,T2=630,T3=138,T4=40)	T2	3.6451	TCGA-AC-A3W5-01
BRCA(T1=280,T2=630,T3=138,T4=40)	T2	3.42265	TCGA-A7-A13G-01
BRCA(T1=280,T2=630,T3=138,T4=40)	T2	4.6154	TCGA-AR-A1AS-01
BRCA(T1=280,T2=630,T3=138,T4=40)	T2	3.1507	TCGA-C8-A1HJ-01
BRCA(T1=280,T2=630,T3=138,T4=40)	T3	5.0108	TCGA-D8-A1Y1-01
BRCA(T1=280,T2=630,T3=138,T4=40)	T2	5.8692	TCGA-BH-A0DD-01
BRCA(T1=280,T2=630,T3=138,T4=40)	T2	4.327	TCGA-A2-A0EN-01
BRCA(T1=280,T2=630,T3=138,T4=40)	T2	5.4706	TCGA-E9-A1R2-01
BRCA(T1=280,T2=630,T3=138,T4=40)	T3	4.2056	TCGA-A8-A08L-01
BRCA(T1=280,T2=630,T3=138,T4=40)	T2	4.3883	TCGA-A7-A3RF-01
BRCA(T1=280,T2=630,T3=138,T4=40)	T2	4.2518	TCGA-A2-A0D4-01
BRCA(T1=280,T2=630,T3=138,T4=40)	T2	4.0242	TCGA-EW-A1IW-01
BRCA(T1=280,T2=630,T3=138,T4=40)	T1	4.2297	TCGA-AO-A03M-01
BRCA(T1=280,T2=630,T3=138,T4=40)	T3	3.7193	TCGA-B6-A0IQ-01
BRCA(T1=280,T2=630,T3=138,T4=40)	T2	5.067	TCGA-BH-A1EW-01
BRCA(T1=280,T2=630,T3=138,T4=40)	T1	5.1396	TCGA-BH-A1FG-01
BRCA(T1=280,T2=630,T3=138,T4=40)	T2	4.5874	TCGA-AR-A0TS-01
BRCA(T1=280,T2=630,T3=138,T4=40)	T2	3.9506	TCGA-A2-A0CM-01
BRCA(T1=280,T2=630,T3=138,T4=40)	T3	4.6994	TCGA-A8-A06X-01
BRCA(T1=280,T2=630,T3=138,T4=40)	T2	4.594	TCGA-D8-A140-01
BRCA(T1=280,T2=630,T3=138,T4=40)	T2	5.1946	TCGA-E9-A1R6-01
BRCA(T1=280,T2=630,T3=138,T4=40)	T2	4.1219	TCGA-A2-A0CZ-01
BRCA(T1=280,T2=630,T3=138,T4=40)	T2	4.5754	TCGA-BH-A1FE-01
BRCA(T1=280,T2=630,T3=138,T4=40)	T2	4.7872	TCGA-AN-A0XS-01
BRCA(T1=280,T2=630,T3=138,T4=40)	T1	3.5718	TCGA-A2-A04Q-01
BRCA(T1=280,T2=630,T3=138,T4=40)	T2	4.4628	TCGA-WT-AB41-01
BRCA(T1=280,T2=630,T3=138,T4=40)	T2	4.5856	TCGA-BH-A0BV-01
BRCA(T1=280,T2=630,T3=138,T4=40)	T2	4.8033	TCGA-AC-A5XS-01
BRCA(T1=280,T2=630,T3=138,T4=40)	T2	4.3555	TCGA-E2-A109-01
BRCA(T1=280,T2=630,T3=138,T4=40)	T2	5.0773	TCGA-B6-A1KF-01
BRCA(T1=280,T2=630,T3=138,T4=40)	T2	4.2943	TCGA-BH-A1FL-01
BRCA(T1=280,T2=630,T3=138,T4=40)	T2	4.796	TCGA-E9-A1NI-01
BRCA(T1=280,T2=630,T3=138,T4=40)	T2	4.079	TCGA-A8-A07R-01
BRCA(T1=280,T2=630,T3=138,T4=40)	T2	3.8013	TCGA-AN-A03Y-01
BRCA(T1=280,T2=630,T3=138,T4=40)	T3	3.9992	TCGA-BH-A0C1-01
BRCA(T1=280,T2=630,T3=138,T4=40)	T2	4.6623	TCGA-BH-A1FH-01
BRCA(T1=280,T2=630,T3=138,T4=40)	T2	4.3378	TCGA-E2-A572-01
BRCA(T1=280,T2=630,T3=138,T4=40)	T2	5.2631	TCGA-A8-A08H-01
BRCA(T1=280,T2=630,T3=138,T4=40)	T2	4.245	TCGA-JL-A3YW-01
BRCA(T1=280,T2=630,T3=138,T4=40)	T2	4.2833	TCGA-AN-A0XN-01
BRCA(T1=280,T2=630,T3=138,T4=40)	T2	2.5511	TCGA-A1-A0SK-01
BRCA(T1=280,T2=630,T3=138,T4=40)	T2	4.2899	TCGA-AO-A125-01
BRCA(T1=280,T2=630,T3=138,T4=40)	T2	5.0934	TCGA-PE-A5DC-01
BRCA(T1=280,T2=630,T3=138,T4=40)	T2	3.6748	TCGA-E9-A3X8-01
BRCA(T1=280,T2=630,T3=138,T4=40)	T2	5.2044	TCGA-BH-A0AU-01
BRCA(T1=280,T2=630,T3=138,T4=40)	T2	4.1595	TCGA-GM-A2DB-01
BRCA(T1=280,T2=630,T3=138,T4=40)	T2	4.1531	TCGA-E9-A244-01
BRCA(T1=280,T2=630,T3=138,T4=40)	T2	5.1334	TCGA-A8-A0AB-01
BRCA(T1=280,T2=630,T3=138,T4=40)	T2	4.6645	TCGA-A2-A3XV-01
BRCA(T1=280,T2=630,T3=138,T4=40)	T2	3.7678	TCGA-AN-A04A-01
BRCA(T1=280,T2=630,T3=138,T4=40)	T3	4.6781	TCGA-E2-A14O-01
BRCA(T1=280,T2=630,T3=138,T4=40)	T2	5.1555	TCGA-A2-A0T7-01
BRCA(T1=280,T2=630,T3=138,T4=40)	T2	4.3053	TCGA-A7-A0D9-01
BRCA(T1=280,T2=630,T3=138,T4=40)	T2	2.8994	TCGA-GM-A3XL-01
BRCA(T1=280,T2=630,T3=138,T4=40)	T2	4.6955	TCGA-AO-A0JJ-01
BRCA(T1=280,T2=630,T3=138,T4=40)	T2	4.2009	TCGA-A2-A0CV-01
BRCA(T1=280,T2=630,T3=138,T4=40)	T2	3.6417	TCGA-AN-A046-01
BRCA(T1=280,T2=630,T3=138,T4=40)	T3	5.496	TCGA-D8-A1X6-01
BRCA(T1=280,T2=630,T3=138,T4=40)	T3	4.2472	TCGA-EW-A3U0-01
BRCA(T1=280,T2=630,T3=138,T4=40)	T1	4.4162	TCGA-AO-A0JF-01
BRCA(T1=280,T2=630,T3=138,T4=40)	T2	4.717	TCGA-A2-A0T0-01
BRCA(T1=280,T2=630,T3=138,T4=40)	T1	4.6798	TCGA-BH-A0EA-01
BRCA(T1=280,T2=630,T3=138,T4=40)	T2	4.2951	TCGA-D8-A147-01
BRCA(T1=280,T2=630,T3=138,T4=40)	T2	4.2818	TCGA-E9-A54Y-01
BRCA(T1=280,T2=630,T3=138,T4=40)	T2	3.8501	TCGA-LL-A5YN-01
BRCA(T1=280,T2=630,T3=138,T4=40)	T2	4.3413	TCGA-C8-A26Y-01
BRCA(T1=280,T2=630,T3=138,T4=40)	T2	2.8602	TCGA-AN-A0FJ-01
BRCA(T1=280,T2=630,T3=138,T4=40)	T3	3.2435	TCGA-BH-A1EV-01
BRCA(T1=280,T2=630,T3=138,T4=40)	T1	4.2472	TCGA-AO-A03V-01
BRCA(T1=280,T2=630,T3=138,T4=40)	T4	3.7335	TCGA-B6-A0IK-01
BRCA(T1=280,T2=630,T3=138,T4=40)	T1	4.6265	TCGA-E2-A15E-01
BRCA(T1=280,T2=630,T3=138,T4=40)	T2	5.3352	TCGA-E2-A15D-01
BRCA(T1=280,T2=630,T3=138,T4=40)	T2	4.3133	TCGA-E9-A1RB-01
BRCA(T1=280,T2=630,T3=138,T4=40)	T2	3.9365	TCGA-AO-A1KR-01
BRCA(T1=280,T2=630,T3=138,T4=40)	T1	3.6451	TCGA-BH-A18H-01
BRCA(T1=280,T2=630,T3=138,T4=40)	T1	4.2706	TCGA-BH-A0HF-01
BRCA(T1=280,T2=630,T3=138,T4=40)	T2	3.4116	TCGA-C8-A12M-01
BRCA(T1=280,T2=630,T3=138,T4=40)	T3	5.1326	TCGA-C8-A26V-01
BRCA(T1=280,T2=630,T3=138,T4=40)	T4	4.3053	TCGA-B6-A1KN-01
BRCA(T1=280,T2=630,T3=138,T4=40)	T2	4.3242	TCGA-A7-A4SA-01
BRCA(T1=280,T2=630,T3=138,T4=40)	T2	4.5485	TCGA-E2-A15S-01
BRCA(T1=280,T2=630,T3=138,T4=40)	T1	5.1371	TCGA-E9-A1RI-01
BRCA(T1=280,T2=630,T3=138,T4=40)	T1	3.8571	TCGA-GM-A2DI-01
BRCA(T1=280,T2=630,T3=138,T4=40)	T1	4.8156	TCGA-A8-A09T-01
BRCA(T1=280,T2=630,T3=138,T4=40)	T2	4.63	TCGA-D8-A27T-01
BRCA(T1=280,T2=630,T3=138,T4=40)	T2	3.4817	TCGA-C8-A278-01
BRCA(T1=280,T2=630,T3=138,T4=40)	T2	5.6338	TCGA-A8-A09C-01
BRCA(T1=280,T2=630,T3=138,T4=40)	T3	5.6781	TCGA-BH-A18L-01
BRCA(T1=280,T2=630,T3=138,T4=40)	T1	4.0952	TCGA-GM-A2DK-01
BRCA(T1=280,T2=630,T3=138,T4=40)	T2	5.8033	TCGA-E9-A22A-01
BRCA(T1=280,T2=630,T3=138,T4=40)	T2	4.796	TCGA-AC-A3YJ-01
BRCA(T1=280,T2=630,T3=138,T4=40)	T2	4.7624	TCGA-AR-A2LO-01
BRCA(T1=280,T2=630,T3=138,T4=40)	T2	4.3097	TCGA-AC-A23C-01
BRCA(T1=280,T2=630,T3=138,T4=40)	T1	5.2891	TCGA-D8-A1XM-01
BRCA(T1=280,T2=630,T3=138,T4=40)	T1	4.7735	TCGA-BH-A1EU-01
BRCA(T1=280,T2=630,T3=138,T4=40)	T2	3.9346	TCGA-PE-A5DD-01
BRCA(T1=280,T2=630,T3=138,T4=40)	T1	4.1867	TCGA-WT-AB44-01
BRCA(T1=280,T2=630,T3=138,T4=40)	T3	4.9237	TCGA-C8-A8HR-01
BRCA(T1=280,T2=630,T3=138,T4=40)	T2	4.546	TCGA-A2-A0YG-01
BRCA(T1=280,T2=630,T3=138,T4=40)	T3	4.2312	TCGA-A8-A09G-01
BRCA(T1=280,T2=630,T3=138,T4=40)	T2	3.7453	TCGA-EW-A6SA-01
BRCA(T1=280,T2=630,T3=138,T4=40)	T2	2.7249	TCGA-AC-A8OQ-01
BRCA(T1=280,T2=630,T3=138,T4=40)	T2	4.943	TCGA-A1-A0SO-01
BRCA(T1=280,T2=630,T3=138,T4=40)	T2	4.582	TCGA-E2-A10B-01
BRCA(T1=280,T2=630,T3=138,T4=40)	T1	4.9369	TCGA-D8-A1XA-01
BRCA(T1=280,T2=630,T3=138,T4=40)	T4	4.8238	TCGA-AO-A1KQ-01
BRCA(T1=280,T2=630,T3=138,T4=40)	T2	3.9534	TCGA-A8-A0A6-01
BRCA(T1=280,T2=630,T3=138,T4=40)	T2	3.5935	TCGA-AQ-A04J-01
BRCA(T1=280,T2=630,T3=138,T4=40)	T2	4.6702	TCGA-BH-A0W4-01
BRCA(T1=280,T2=630,T3=138,T4=40)	T2	5.3302	TCGA-D8-A1X5-01
BRCA(T1=280,T2=630,T3=138,T4=40)	T3	4.4397	TCGA-GM-A3XG-01
BRCA(T1=280,T2=630,T3=138,T4=40)	T2	4.7709	TCGA-A2-A4RW-01
BRCA(T1=280,T2=630,T3=138,T4=40)	T2	3.9175	TCGA-D8-A1XV-01
BRCA(T1=280,T2=630,T3=138,T4=40)	T1	3.6207	TCGA-D8-A13Y-01
BRCA(T1=280,T2=630,T3=138,T4=40)	T2	4.4162	TCGA-AR-A0TU-01
BRCA(T1=280,T2=630,T3=138,T4=40)	T1	3.8033	TCGA-BH-A0B0-01
BRCA(T1=280,T2=630,T3=138,T4=40)	T1	5.172	TCGA-E2-A15P-01
BRCA(T1=280,T2=630,T3=138,T4=40)	T3	3.9099	TCGA-D8-A1JN-01
BRCA(T1=280,T2=630,T3=138,T4=40)	T1	4.5034	TCGA-BH-A0B8-01
BRCA(T1=280,T2=630,T3=138,T4=40)	T2	5.104	TCGA-E9-A1RD-01
BRCA(T1=280,T2=630,T3=138,T4=40)	T2	4.4397	TCGA-AC-A2FG-01
BRCA(T1=280,T2=630,T3=138,T4=40)	T2	4.8136	TCGA-A2-A0ET-01
BRCA(T1=280,T2=630,T3=138,T4=40)	T1	4.4874	TCGA-E2-A15R-01
BRCA(T1=280,T2=630,T3=138,T4=40)	T3	4.3944	TCGA-A2-A3KD-01
BRCA(T1=280,T2=630,T3=138,T4=40)	T2	4.391	TCGA-E9-A1NG-01
BRCA(T1=280,T2=630,T3=138,T4=40)	T2	4.402	TCGA-AC-A6NO-01
BRCA(T1=280,T2=630,T3=138,T4=40)	T4	4.3653	TCGA-A8-A08J-01
BRCA(T1=280,T2=630,T3=138,T4=40)	T3	4.3082	TCGA-A2-A0CO-01
BRCA(T1=280,T2=630,T3=138,T4=40)	T2	4.4536	TCGA-AN-A0FZ-01
BRCA(T1=280,T2=630,T3=138,T4=40)	T3	4.085	TCGA-A2-A0YD-01
BRCA(T1=280,T2=630,T3=138,T4=40)	T1	5.1173	TCGA-EW-A1J2-01
BRCA(T1=280,T2=630,T3=138,T4=40)	T2	5.1396	TCGA-C8-A12N-01
BRCA(T1=280,T2=630,T3=138,T4=40)	T2	4.2312	TCGA-A2-A25F-01
BRCA(T1=280,T2=630,T3=138,T4=40)	T2	4.5243	TCGA-A8-A0A1-01
BRCA(T1=280,T2=630,T3=138,T4=40)	T1	4.8233	TCGA-D8-A27E-01
BRCA(T1=280,T2=630,T3=138,T4=40)	T2	4.1899	TCGA-EW-A1IZ-01
BRCA(T1=280,T2=630,T3=138,T4=40)	T3	4.6821	TCGA-B6-A0IB-01
BRCA(T1=280,T2=630,T3=138,T4=40)	T4	4.656	TCGA-A8-A08Z-01
BRCA(T1=280,T2=630,T3=138,T4=40)	T1	3.18526	TCGA-AC-A3QQ-01
BRCA(T1=280,T2=630,T3=138,T4=40)	T2	5.3349	TCGA-E2-A15T-01
BRCA(T1=280,T2=630,T3=138,T4=40)	T2	4.0028	TCGA-BH-A0BC-01
BRCA(T1=280,T2=630,T3=138,T4=40)	T2	4.8161	TCGA-AR-A0TV-01
BRCA(T1=280,T2=630,T3=138,T4=40)	T1	4.5293	TCGA-E2-A154-01
BRCA(T1=280,T2=630,T3=138,T4=40)	T3	4.3184	TCGA-GM-A4E0-01
BRCA(T1=280,T2=630,T3=138,T4=40)	T2	4.7751	TCGA-AO-A124-01
BRCA(T1=280,T2=630,T3=138,T4=40)	T2	3.863	TCGA-S3-A6ZF-01
BRCA(T1=280,T2=630,T3=138,T4=40)	T2	4.1563	TCGA-A8-A09D-01
BRCA(T1=280,T2=630,T3=138,T4=40)	T2	4.3249	TCGA-AN-A0XO-01
BRCA(T1=280,T2=630,T3=138,T4=40)	T2	4.4777	TCGA-BH-A0DQ-01
BRCA(T1=280,T2=630,T3=138,T4=40)	T2	3.3163	TCGA-A2-A4S3-01
BRCA(T1=280,T2=630,T3=138,T4=40)	T2	2.9674	TCGA-A2-A0D1-01
BRCA(T1=280,T2=630,T3=138,T4=40)	T2	4.7893	TCGA-AO-A0J3-01
BRCA(T1=280,T2=630,T3=138,T4=40)	T1	3.6793	TCGA-A2-A0ST-01
BRCA(T1=280,T2=630,T3=138,T4=40)	T2	4.7231	TCGA-E9-A1RE-01
BRCA(T1=280,T2=630,T3=138,T4=40)	T2	4.3009	TCGA-A2-A25A-01
BRCA(T1=280,T2=630,T3=138,T4=40)	T2	5.1144	TCGA-C8-A1HK-01
BRCA(T1=280,T2=630,T3=138,T4=40)	T2	4.8455	TCGA-AR-A0TR-01
BRCA(T1=280,T2=630,T3=138,T4=40)	T3	4.7523	TCGA-AC-A2B8-01
BRCA(T1=280,T2=630,T3=138,T4=40)	T2	4.0713	TCGA-E2-A1LG-01
BRCA(T1=280,T2=630,T3=138,T4=40)	T2	3.0163	TCGA-A7-A6VW-01
BRCA(T1=280,T2=630,T3=138,T4=40)	T2	4.0331	TCGA-AC-A3W7-01
BRCA(T1=280,T2=630,T3=138,T4=40)	T4	4.7159	TCGA-E2-A1LK-01
BRCA(T1=280,T2=630,T3=138,T4=40)	T3	4.1466	TCGA-B6-A0RT-01
BRCA(T1=280,T2=630,T3=138,T4=40)	T1	5.0781	TCGA-BH-A0HB-01
BRCA(T1=280,T2=630,T3=138,T4=40)	T4	3.8847	TCGA-C8-A3M7-01
BRCA(T1=280,T2=630,T3=138,T4=40)	T2	4.6548	TCGA-D8-A1Y3-01
BRCA(T1=280,T2=630,T3=138,T4=40)	T2	3.8915	TCGA-A8-A07C-01
BRCA(T1=280,T2=630,T3=138,T4=40)	T2	4.4457	TCGA-A8-A06U-01
BRCA(T1=280,T2=630,T3=138,T4=40)	T3	3.1028	TCGA-GI-A2C9-01
BRCA(T1=280,T2=630,T3=138,T4=40)	T3	4.5796	TCGA-D8-A73W-01
BRCA(T1=280,T2=630,T3=138,T4=40)	T2	4.1708	TCGA-E9-A245-01
BRCA(T1=280,T2=630,T3=138,T4=40)	T1	4.8924	TCGA-B6-A0X0-01
BRCA(T1=280,T2=630,T3=138,T4=40)	T3	4.4977	TCGA-A8-A06Q-01
BRCA(T1=280,T2=630,T3=138,T4=40)	T1	4.7077	TCGA-E9-A1R0-01
BRCA(T1=280,T2=630,T3=138,T4=40)	T4	4.6358	TCGA-B6-A0RO-01
BRCA(T1=280,T2=630,T3=138,T4=40)	T2	5.5999	TCGA-E9-A1NA-01
BRCA(T1=280,T2=630,T3=138,T4=40)	T2	3.7571	TCGA-BH-A0DZ-01
BRCA(T1=280,T2=630,T3=138,T4=40)	T2	4.6112	TCGA-AN-A0XP-01
BRCA(T1=280,T2=630,T3=138,T4=40)	T1	4.3399	TCGA-EW-A6S9-01
BRCA(T1=280,T2=630,T3=138,T4=40)	T2	4.1883	TCGA-AQ-A54O-01
BRCA(T1=280,T2=630,T3=138,T4=40)	T1	4.0144	TCGA-BH-A0WA-01
BRCA(T1=280,T2=630,T3=138,T4=40)	T3	4.9942	TCGA-BH-AB28-01
BRCA(T1=280,T2=630,T3=138,T4=40)	T2	4.2212	TCGA-A8-A09N-01
BRCA(T1=280,T2=630,T3=138,T4=40)	T2	4.6747	TCGA-E2-A15A-01
BRCA(T1=280,T2=630,T3=138,T4=40)	T2	3.863	TCGA-E9-A2JT-01
BRCA(T1=280,T2=630,T3=138,T4=40)	T2	4.4283	TCGA-BH-A0HQ-01
BRCA(T1=280,T2=630,T3=138,T4=40)	T2	4.2373	TCGA-E2-A3DX-01
BRCA(T1=280,T2=630,T3=138,T4=40)	T1	4.7274	TCGA-E2-A1L6-01
BRCA(T1=280,T2=630,T3=138,T4=40)	T1	3.3938	TCGA-B6-A0I2-01
BRCA(T1=280,T2=630,T3=138,T4=40)	T2	4.6798	TCGA-D8-A73X-01
BRCA(T1=280,T2=630,T3=138,T4=40)	T2	3.8798	TCGA-A8-A084-01
BRCA(T1=280,T2=630,T3=138,T4=40)	T2	4.2676	TCGA-A7-A2KD-01
BRCA(T1=280,T2=630,T3=138,T4=40)	T1	5.0237	TCGA-AR-A252-01
BRCA(T1=280,T2=630,T3=138,T4=40)	T2	4.9933	TCGA-AR-A24L-01
BRCA(T1=280,T2=630,T3=138,T4=40)	T2	5.3281	TCGA-AN-A0XR-01
BRCA(T1=280,T2=630,T3=138,T4=40)	T2	3.5035	TCGA-BH-A18V-01
BRCA(T1=280,T2=630,T3=138,T4=40)	T3	4.637	TCGA-B6-A0WY-01
BRCA(T1=280,T2=630,T3=138,T4=40)	T2	4.9284	TCGA-EW-A423-01
BRCA(T1=280,T2=630,T3=138,T4=40)	T2	3.0688	TCGA-C8-A12X-01
BRCA(T1=280,T2=630,T3=138,T4=40)	T2	5.235	TCGA-E9-A5UO-01
BRCA(T1=280,T2=630,T3=138,T4=40)	T2	3.7127	TCGA-BH-A18U-01
BRCA(T1=280,T2=630,T3=138,T4=40)	T1	4.7571	TCGA-BH-A0C0-01
BRCA(T1=280,T2=630,T3=138,T4=40)	T2	5.331	TCGA-A8-A09I-01
BRCA(T1=280,T2=630,T3=138,T4=40)	T2	5.7458	TCGA-E9-A22D-01
BRCA(T1=280,T2=630,T3=138,T4=40)	T2	6.3882	TCGA-E2-A1LE-01
BRCA(T1=280,T2=630,T3=138,T4=40)	T1	5.2884	TCGA-E2-A15F-01
BRCA(T1=280,T2=630,T3=138,T4=40)	T1	4.8435	TCGA-D8-A27L-01
BRCA(T1=280,T2=630,T3=138,T4=40)	T2	4.6177	TCGA-C8-A12O-01
BRCA(T1=280,T2=630,T3=138,T4=40)	T4	4.5988	TCGA-D8-A1XG-01
BRCA(T1=280,T2=630,T3=138,T4=40)	T2	4.5199	TCGA-C8-A8HQ-01
BRCA(T1=280,T2=630,T3=138,T4=40)	T2	4.3053	TCGA-E2-A15M-01
BRCA(T1=280,T2=630,T3=138,T4=40)	T3	4.8885	TCGA-A8-A083-01
BRCA(T1=280,T2=630,T3=138,T4=40)	T3	4.3328	TCGA-AC-A3TN-01
BRCA(T1=280,T2=630,T3=138,T4=40)	T2	5.1445	TCGA-B6-A0IC-01
BRCA(T1=280,T2=630,T3=138,T4=40)	T2	4.3313	TCGA-A2-A0CW-01
BRCA(T1=280,T2=630,T3=138,T4=40)	T2	4.8949	TCGA-A8-A092-01
BRCA(T1=280,T2=630,T3=138,T4=40)	T2	5.4735	TCGA-D8-A1XS-01
BRCA(T1=280,T2=630,T3=138,T4=40)	T2	3.7836	TCGA-BH-A18Q-01
BRCA(T1=280,T2=630,T3=138,T4=40)	T2	4.588	TCGA-AO-A12B-01
BRCA(T1=280,T2=630,T3=138,T4=40)	T3	4.3356	TCGA-AC-A3EH-01
BRCA(T1=280,T2=630,T3=138,T4=40)	T1	2.49391	TCGA-A7-A26F-01
BRCA(T1=280,T2=630,T3=138,T4=40)	T2	3.5779	TCGA-AO-A12F-01
BRCA(T1=280,T2=630,T3=138,T4=40)	T2	4.7819	TCGA-EW-A1P6-01
BRCA(T1=280,T2=630,T3=138,T4=40)	T1	2.3308	TCGA-GM-A2DF-01
BRCA(T1=280,T2=630,T3=138,T4=40)	T4	4.2899	TCGA-A8-A09Q-01
BRCA(T1=280,T2=630,T3=138,T4=40)	T2	4.588	TCGA-AC-A2FF-01
BRCA(T1=280,T2=630,T3=138,T4=40)	T4	3.9051	TCGA-BH-A18J-01
BRCA(T1=280,T2=630,T3=138,T4=40)	T4	4.5243	TCGA-C8-A12W-01
BRCA(T1=280,T2=630,T3=138,T4=40)	T3	3.2526	TCGA-A2-A0YJ-01
BRCA(T1=280,T2=630,T3=138,T4=40)	T1	4.7851	TCGA-D8-A1XD-01
BRCA(T1=280,T2=630,T3=138,T4=40)	T2	5.4861	TCGA-AQ-A1H2-01
BRCA(T1=280,T2=630,T3=138,T4=40)	T3	4.5663	TCGA-AR-A24O-01
BRCA(T1=280,T2=630,T3=138,T4=40)	T1	4.2343	TCGA-A8-A0AD-01
BRCA(T1=280,T2=630,T3=138,T4=40)	T1	5.1123	TCGA-A7-A3J1-01
BRCA(T1=280,T2=630,T3=138,T4=40)	T2	3.5411	TCGA-A2-A0EQ-01
BRCA(T1=280,T2=630,T3=138,T4=40)	T1	3.3591	TCGA-B6-A402-01
BRCA(T1=280,T2=630,T3=138,T4=40)	T2	4.6702	TCGA-LD-A7W6-01
BRCA(T1=280,T2=630,T3=138,T4=40)	T4	4.6548	TCGA-BH-A1FR-01
BRCA(T1=280,T2=630,T3=138,T4=40)	T2	4.6393	TCGA-A8-A08B-01
BRCA(T1=280,T2=630,T3=138,T4=40)	T2	2.9784	TCGA-D8-A1XK-01
BRCA(T1=280,T2=630,T3=138,T4=40)	T1	5.0313	TCGA-BH-A0BT-01
BRCA(T1=280,T2=630,T3=138,T4=40)	T1	4.1153	TCGA-AO-A03U-01
BRCA(T1=280,T2=630,T3=138,T4=40)	T1	4.66	TCGA-OL-A66H-01
BRCA(T1=280,T2=630,T3=138,T4=40)	T1	4.6387	TCGA-AR-A1AJ-01
BRCA(T1=280,T2=630,T3=138,T4=40)	T2	5.8924	TCGA-E9-A5UP-01
BRCA(T1=280,T2=630,T3=138,T4=40)	T2	3.8511	TCGA-AC-A8OS-01
BRCA(T1=280,T2=630,T3=138,T4=40)	T1	4.892	TCGA-BH-A0DT-01
BRCA(T1=280,T2=630,T3=138,T4=40)	T2	2.9243	TCGA-LL-A7SZ-01
BRCA(T1=280,T2=630,T3=138,T4=40)	T2	3.695	TCGA-AN-A0G0-01
BRCA(T1=280,T2=630,T3=138,T4=40)	T2	4.096	TCGA-E2-A14Q-01
BRCA(T1=280,T2=630,T3=138,T4=40)	T2	4.7751	TCGA-A2-A1FZ-01
BRCA(T1=280,T2=630,T3=138,T4=40)	T2	3.7127	TCGA-OL-A5D6-01
BRCA(T1=280,T2=630,T3=138,T4=40)	T1	3.4543	TCGA-BH-A0B9-01
BRCA(T1=280,T2=630,T3=138,T4=40)	T2	3.2481	TCGA-AR-A1AQ-01
BRCA(T1=280,T2=630,T3=138,T4=40)	T2	4.382	TCGA-E9-A226-01
BRCA(T1=280,T2=630,T3=138,T4=40)	T2	4.6171	TCGA-E9-A1NF-01
BRCA(T1=280,T2=630,T3=138,T4=40)	T2	3.7356	TCGA-BH-A0DL-01
BRCA(T1=280,T2=630,T3=138,T4=40)	T2	4.6053	TCGA-A2-A4S1-01
BRCA(T1=280,T2=630,T3=138,T4=40)	T2	5.0605	TCGA-E2-A1B0-01
BRCA(T1=280,T2=630,T3=138,T4=40)	T2	5.6488	TCGA-C8-A26W-01
BRCA(T1=280,T2=630,T3=138,T4=40)	T1	4.6566	TCGA-D8-A1JH-01
BRCA(T1=280,T2=630,T3=138,T4=40)	T1	3.3076	TCGA-AO-A12D-01
BRCA(T1=280,T2=630,T3=138,T4=40)	T2	4.8924	TCGA-AC-A2FM-01
BRCA(T1=280,T2=630,T3=138,T4=40)	T3	3.8411	TCGA-E9-A3Q9-01
BRCA(T1=280,T2=630,T3=138,T4=40)	T4	3.3869	TCGA-AN-A0AL-01
BRCA(T1=280,T2=630,T3=138,T4=40)	T2	5.2411	TCGA-B6-A0WW-01
BRCA(T1=280,T2=630,T3=138,T4=40)	T1	3.2297	TCGA-OL-A5RZ-01
BRCA(T1=280,T2=630,T3=138,T4=40)	T2	4.2906	TCGA-D8-A1JL-01
BRCA(T1=280,T2=630,T3=138,T4=40)	T2	3.32065	TCGA-A7-A0DB-01
BRCA(T1=280,T2=630,T3=138,T4=40)	T2	4.6742	TCGA-AR-A1AV-01
BRCA(T1=280,T2=630,T3=138,T4=40)	T2	5.0484	TCGA-D8-A1JC-01
BRCA(T1=280,T2=630,T3=138,T4=40)	T2	3.6113	TCGA-EW-A1OW-01
BRCA(T1=280,T2=630,T3=138,T4=40)	T2	4.5342	TCGA-B6-A2IU-01
BRCA(T1=280,T2=630,T3=138,T4=40)	T2	6.2747	TCGA-C8-A137-01
BRCA(T1=280,T2=630,T3=138,T4=40)	T2	5.1177	TCGA-C8-A1HN-01
BRCA(T1=280,T2=630,T3=138,T4=40)	T2	4.8304	TCGA-E2-A1L8-01
BRCA(T1=280,T2=630,T3=138,T4=40)	T2	4.03686	TCGA-A7-A26J-01
BRCA(T1=280,T2=630,T3=138,T4=40)	T2	4.7507	TCGA-BH-A0E7-01
BRCA(T1=280,T2=630,T3=138,T4=40)	T2	3.8925	TCGA-D8-A73U-01
BRCA(T1=280,T2=630,T3=138,T4=40)	T2	4.0171	TCGA-D8-A27N-01
BRCA(T1=280,T2=630,T3=138,T4=40)	T2	2.9729	TCGA-LL-A8F5-01
BRCA(T1=280,T2=630,T3=138,T4=40)	T2	3.5498	TCGA-C8-A8HP-01
BRCA(T1=280,T2=630,T3=138,T4=40)	T2	4.8228	TCGA-BH-A6R8-01
BRCA(T1=280,T2=630,T3=138,T4=40)	T2	4.2442	TCGA-BH-A202-01
BRCA(T1=280,T2=630,T3=138,T4=40)	T1	3.7752	TCGA-OL-A5RY-01
BRCA(T1=280,T2=630,T3=138,T4=40)	T1	3.5498	TCGA-OL-A66I-01
BRCA(T1=280,T2=630,T3=138,T4=40)	T2	4.2877	TCGA-C8-A12V-01
BRCA(T1=280,T2=630,T3=138,T4=40)	T3	3.39063	TCGA-A7-A26E-01
BRCA(T1=280,T2=630,T3=138,T4=40)	T2	3.4933	TCGA-AO-A03N-01
BRCA(T1=280,T2=630,T3=138,T4=40)	T2	4.6662	TCGA-BH-A42T-01
BRCA(T1=280,T2=630,T3=138,T4=40)	T1	4.5832	TCGA-BH-A0HO-01
BRCA(T1=280,T2=630,T3=138,T4=40)	T2	4.0207	TCGA-A8-A09X-01
BRCA(T1=280,T2=630,T3=138,T4=40)	T2	4.6713	TCGA-AR-A254-01
BRCA(T1=280,T2=630,T3=138,T4=40)	T2	3.5971	TCGA-BH-A0HL-01
BRCA(T1=280,T2=630,T3=138,T4=40)	T2	4.7334	TCGA-AC-A3HN-01
BRCA(T1=280,T2=630,T3=138,T4=40)	T1	4.6364	TCGA-BH-A0H7-01
BRCA(T1=280,T2=630,T3=138,T4=40)	T2	4.6606	TCGA-AC-A6IW-01
BRCA(T1=280,T2=630,T3=138,T4=40)	T3	5.3198	TCGA-EW-A1J5-01
BRCA(T1=280,T2=630,T3=138,T4=40)	T1	4.9973	TCGA-OL-A6VO-01
BRCA(T1=280,T2=630,T3=138,T4=40)	T2	4.2274	TCGA-AC-A23E-01
BRCA(T1=280,T2=630,T3=138,T4=40)	T2	3.7529	TCGA-EW-A1J1-01
BRCA(T1=280,T2=630,T3=138,T4=40)	T2	4.5167	TCGA-A8-A09W-01
BRCA(T1=280,T2=630,T3=138,T4=40)	T3	4.7458	TCGA-B6-A0IM-01
BRCA(T1=280,T2=630,T3=138,T4=40)	T1	4.7571	TCGA-BH-A1F0-01
BRCA(T1=280,T2=630,T3=138,T4=40)	T1	4.7372	TCGA-EW-A1PD-01
BRCA(T1=280,T2=630,T3=138,T4=40)	T2	4.0679	TCGA-D8-A1J8-01
BRCA(T1=280,T2=630,T3=138,T4=40)	T3	3.7259	TCGA-B6-A0RV-01
BRCA(T1=280,T2=630,T3=138,T4=40)	T1	4.9222	TCGA-AR-A24N-01
BRCA(T1=280,T2=630,T3=138,T4=40)	T2	5.026	TCGA-AQ-A1H3-01
BRCA(T1=280,T2=630,T3=138,T4=40)	T2	4.0713	TCGA-C8-A131-01
BRCA(T1=280,T2=630,T3=138,T4=40)	T3	4.2766	TCGA-AR-A2LQ-01
BRCA(T1=280,T2=630,T3=138,T4=40)	T1	4.2661	TCGA-A2-A0EP-01
BRCA(T1=280,T2=630,T3=138,T4=40)	T1	4.6764	TCGA-BH-A0H3-01
BRCA(T1=280,T2=630,T3=138,T4=40)	T3	4.9805	TCGA-BH-A1FJ-01
BRCA(T1=280,T2=630,T3=138,T4=40)	T3	4.8223	TCGA-B6-A40C-01
BRCA(T1=280,T2=630,T3=138,T4=40)	T1	4.7819	TCGA-E2-A1IF-01
BRCA(T1=280,T2=630,T3=138,T4=40)	T2	4.5934	TCGA-AO-A0JE-01
BRCA(T1=280,T2=630,T3=138,T4=40)	T2	4.1153	TCGA-S3-AA11-01
BRCA(T1=280,T2=630,T3=138,T4=40)	T1	4.8304	TCGA-D8-A27I-01
BRCA(T1=280,T2=630,T3=138,T4=40)	T3	4.1376	TCGA-AC-A3W6-01
BRCA(T1=280,T2=630,T3=138,T4=40)	T1	3.927	TCGA-AR-A0TX-01
BRCA(T1=280,T2=630,T3=138,T4=40)	T2	5.1252	TCGA-AO-A0JG-01
BRCA(T1=280,T2=630,T3=138,T4=40)	T3	4.8007	TCGA-A8-A07L-01
BRCA(T1=280,T2=630,T3=138,T4=40)	T2	4.8842	TCGA-A2-A0SV-01
BRCA(T1=280,T2=630,T3=138,T4=40)	T1	4.2488	TCGA-XX-A899-01
BRCA(T1=280,T2=630,T3=138,T4=40)	T1	4.6543	TCGA-A7-A5ZW-01
BRCA(T1=280,T2=630,T3=138,T4=40)	T2	4.5632	TCGA-E9-A1NE-01
BRCA(T1=280,T2=630,T3=138,T4=40)	T1	3.5694	TCGA-BH-A0BR-01
BRCA(T1=280,T2=630,T3=138,T4=40)	T1	4.5772	TCGA-Z7-A8R6-01
BRCA(T1=280,T2=630,T3=138,T4=40)	T3	4.0645	TCGA-OL-A5D8-01
BRCA(T1=280,T2=630,T3=138,T4=40)	T3	2.828	TCGA-B6-A0IJ-01
BRCA(T1=280,T2=630,T3=138,T4=40)	T2	4.2297	TCGA-OL-A5D7-01
BRCA(T1=280,T2=630,T3=138,T4=40)	T3	3.9403	TCGA-A2-A1FW-01
BRCA(T1=280,T2=630,T3=138,T4=40)	T2	4.4142	TCGA-A7-A13H-01
BRCA(T1=280,T2=630,T3=138,T4=40)	T1	4.2862	TCGA-A2-A0EO-01
BRCA(T1=280,T2=630,T3=138,T4=40)	T2	4.232	TCGA-BH-A0BF-01
BRCA(T1=280,T2=630,T3=138,T4=40)	T2	4.2914	TCGA-AR-A5QN-01
BRCA(T1=280,T2=630,T3=138,T4=40)	T2	3.4451	TCGA-AQ-A54N-01
BRCA(T1=280,T2=630,T3=138,T4=40)	T2	4.4977	TCGA-A2-A04V-01
BRCA(T1=280,T2=630,T3=138,T4=40)	T2	4.9672	TCGA-E2-A14T-01
BRCA(T1=280,T2=630,T3=138,T4=40)	T2	4.4423	TCGA-E9-A295-01
BRCA(T1=280,T2=630,T3=138,T4=40)	T2	3.8501	TCGA-EW-A1P4-01
BRCA(T1=280,T2=630,T3=138,T4=40)	T2	4.8202	TCGA-A2-A0T4-01
BRCA(T1=280,T2=630,T3=138,T4=40)	T1	5.3699	TCGA-BH-A0W3-01
BRCA(T1=280,T2=630,T3=138,T4=40)	T2	3.928	TCGA-BH-A42U-01
BRCA(T1=280,T2=630,T3=138,T4=40)	T2	5.1835	TCGA-A8-A08G-01
BRCA(T1=280,T2=630,T3=138,T4=40)	T1	4.7066	TCGA-BH-A0BQ-01
BRCA(T1=280,T2=630,T3=138,T4=40)	T1	4.8545	TCGA-EW-A1IX-01
BRCA(T1=280,T2=630,T3=138,T4=40)	T2	4.8355	TCGA-GM-A5PV-01
BRCA(T1=280,T2=630,T3=138,T4=40)	T1	4.4906	TCGA-B6-A401-01
BRCA(T1=280,T2=630,T3=138,T4=40)	T2	4.4027	TCGA-C8-A1HG-01
BRCA(T1=280,T2=630,T3=138,T4=40)	T1	4.686	TCGA-E2-A10E-01
BRCA(T1=280,T2=630,T3=138,T4=40)	T2	3.8441	TCGA-A7-A0CG-01
BRCA(T1=280,T2=630,T3=138,T4=40)	T4	5.0357	TCGA-A2-A0CS-01
BRCA(T1=280,T2=630,T3=138,T4=40)	T2	4.9141	TCGA-A1-A0SG-01
BRCA(T1=280,T2=630,T3=138,T4=40)	T2	4.918	TCGA-E2-A1BD-01
BRCA(T1=280,T2=630,T3=138,T4=40)	T1	5.3834	TCGA-E2-A14Z-01
BRCA(T1=280,T2=630,T3=138,T4=40)	T1	5.2107	TCGA-A2-A04R-01
BRCA(T1=280,T2=630,T3=138,T4=40)	T3	4.4842	TCGA-A7-A425-01
BRCA(T1=280,T2=630,T3=138,T4=40)	T2	4.0884	TCGA-E9-A1RF-01
BRCA(T1=280,T2=630,T3=138,T4=40)	T2	4.449	TCGA-B6-A408-01
BRCA(T1=280,T2=630,T3=138,T4=40)	T2	3.5803	TCGA-AN-A0AM-01
BRCA(T1=280,T2=630,T3=138,T4=40)	T1	4.673	TCGA-D8-A1JU-01
BRCA(T1=280,T2=630,T3=138,T4=40)	T2	3.8876	TCGA-AR-A1AH-01
BRCA(T1=280,T2=630,T3=138,T4=40)	T2	3.1701	TCGA-BH-A1EN-01
BRCA(T1=280,T2=630,T3=138,T4=40)	T2	3.0568	TCGA-E9-A3QA-01
BRCA(T1=280,T2=630,T3=138,T4=40)	T1	4.4503	TCGA-BH-A0EB-01
BRCA(T1=280,T2=630,T3=138,T4=40)	T2	4.3896	TCGA-BH-A1EY-01
BRCA(T1=280,T2=630,T3=138,T4=40)	T2	3.1701	TCGA-E2-A574-01
BRCA(T1=280,T2=630,T3=138,T4=40)	T2	4.9612	TCGA-D8-A1JB-01
BRCA(T1=280,T2=630,T3=138,T4=40)	T1	4.7814	TCGA-D8-A27P-01
BRCA(T1=280,T2=630,T3=138,T4=40)	T3	3.8925	TCGA-E9-A5FL-01
BRCA(T1=280,T2=630,T3=138,T4=40)	T4	4.4771	TCGA-LL-A5YM-01
BRCA(T1=280,T2=630,T3=138,T4=40)	T1	4.4549	TCGA-BH-A1FC-01
BRCA(T1=280,T2=630,T3=138,T4=40)	T3	4.3758	TCGA-XX-A89A-01
BRCA(T1=280,T2=630,T3=138,T4=40)	T1	3.9156	TCGA-GM-A2DL-01
BRCA(T1=280,T2=630,T3=138,T4=40)	T3	4.7176	TCGA-AO-A12E-01
BRCA(T1=280,T2=630,T3=138,T4=40)	T1	3.958	TCGA-AR-A24S-01
BRCA(T1=280,T2=630,T3=138,T4=40)	T2	4.5417	TCGA-E2-A15K-01
BRCA(T1=280,T2=630,T3=138,T4=40)	T2	4.0884	TCGA-AO-A12G-01
BRCA(T1=280,T2=630,T3=138,T4=40)	T1	5.073	TCGA-BH-A0HA-01
BRCA(T1=280,T2=630,T3=138,T4=40)	T2	4.3786	TCGA-W8-A86G-01
BRCA(T1=280,T2=630,T3=138,T4=40)	T2	4.7437	TCGA-E2-A153-01
BRCA(T1=280,T2=630,T3=138,T4=40)	T2	4.3883	TCGA-AR-A24W-01
BRCA(T1=280,T2=630,T3=138,T4=40)	T2	3.9412	TCGA-D8-A1JJ-01
BRCA(T1=280,T2=630,T3=138,T4=40)	T2	4.1636	TCGA-AO-A03P-01
BRCA(T1=280,T2=630,T3=138,T4=40)	T1	3.4143	TCGA-E2-A158-01
BRCA(T1=280,T2=630,T3=138,T4=40)	T4	3.7762	TCGA-A8-A079-01
BRCA(T1=280,T2=630,T3=138,T4=40)	T2	3.8023	TCGA-BH-A204-01
BRCA(T1=280,T2=630,T3=138,T4=40)	T2	4.1756	TCGA-BH-A0B4-01
BRCA(T1=280,T2=630,T3=138,T4=40)	T2	4.0782	TCGA-AO-A03T-01
BRCA(T1=280,T2=630,T3=138,T4=40)	T2	5.682	TCGA-E9-A1N6-01
BRCA(T1=280,T2=630,T3=138,T4=40)	T2	4.8238	TCGA-GM-A2DM-01
BRCA(T1=280,T2=630,T3=138,T4=40)	T2	3.2722	TCGA-A2-A4RX-01
BRCA(T1=280,T2=630,T3=138,T4=40)	T2	3.345	TCGA-D8-A27H-01
BRCA(T1=280,T2=630,T3=138,T4=40)	T2	3.325	TCGA-E9-A1NC-01
BRCA(T1=280,T2=630,T3=138,T4=40)	T1	3.5086	TCGA-A2-A3XS-01
BRCA(T1=280,T2=630,T3=138,T4=40)	T2	5.2461	TCGA-AR-A0TZ-01
BRCA(T1=280,T2=630,T3=138,T4=40)	T2	4.2899	TCGA-AO-A0J7-01
BRCA(T1=280,T2=630,T3=138,T4=40)	T2	5.6471	TCGA-D8-A1XY-01
BRCA(T1=280,T2=630,T3=138,T4=40)	T3	4.5946	TCGA-A2-A0CK-01
BRCA(T1=280,T2=630,T3=138,T4=40)	T1	4.6821	TCGA-AC-A8OR-01
BRCA(T1=280,T2=630,T3=138,T4=40)	T2	5.1704	TCGA-A2-A0YH-01
BRCA(T1=280,T2=630,T3=138,T4=40)	T3	4.1899	TCGA-A2-A4S2-01
BRCA(T1=280,T2=630,T3=138,T4=40)	T2	4.6944	TCGA-AQ-A7U7-01
BRCA(T1=280,T2=630,T3=138,T4=40)	T3	4.9575	TCGA-E2-A10A-01
BRCA(T1=280,T2=630,T3=138,T4=40)	T2	4.0799	TCGA-C8-A12P-01
[truncated: 6,978 more rows]
